# Supplementary material for: Systematic analysis of membrane contact sites in Saccharomyces cerevisiae uncovers modulators of cellular lipid distribution
Source: eLife. 2022 Nov 10;11:e74602. doi: 10.7554/eLife.74602 (PMC9648973; doi:10.7554/eLife.74602)
Supplement: Figure 1—figure supplement 1—source data 1. [file elife-74602-fig1-figsupp1-data1.xlsx]

## Sheet: Sheet1
Fig.1 S1B
	Pex3	Ste13
Replicate 1	14.4998	7.96337
Replicate 2	14.5464	7.9308
Replicate 3	15.7015	9.19419
Fig.1 S1D I)
	Complete	AA Depletion
Replicate 1	9	16
Replicate 2	6	19
Replicate 3	6	19
Fig.1 S1D II)
	Complete	AA Depletion
Replicate 1	9.59716	12.5
Replicate 2	8.51461	14.8289
Replicate 3	8.55385	11.838
