# Supplementary material for: Systematic analysis of membrane contact sites in Saccharomyces cerevisiae uncovers modulators of cellular lipid distribution
Source: eLife. 2022 Nov 10;11:e74602. doi: 10.7554/eLife.74602 (PMC9648973; doi:10.7554/eLife.74602)
Supplement: Figure 1—source data 1. [file elife-74602-fig1-data1.xlsx]

## Sheet: Sheet1
Figure 1B -Number of newly suggested contact site residents and effectors (excluding known contact site residents), categorized based on co-localization with- and/or effect on contact site reporter.
	Localisation	Effect	Both
NVJ	2	8	5
LiDER	18	15	25
pCLIP	22	12	3
PerMit	34	14	13
PerVale	32	7	6
GoPo	28	2	8
