# Supplementary material for: Systematic analysis of membrane contact sites in Saccharomyces cerevisiae uncovers modulators of cellular lipid distribution
Source: eLife. 2022 Nov 10;11:e74602. doi: 10.7554/eLife.74602 (PMC9648973; doi:10.7554/eLife.74602)
Supplement: Figure 3—figure supplement 1—source data 1. [file elife-74602-fig3-figsupp1-data1.xlsx]

## Sheet: Quantification
≤ 1							1 > 2							2 > 3							> 3								cyto			puncta			bud/neck
Exp 1		Exp 2		Exp 3			Exp 1		Exp 2		Exp 3			Exp 1		Exp 2		Exp 3			Exp 1		Exp 2		Exp 3				Exp 1	Exp 2	Exp 3	Exp 1	Exp 2	Exp 3	Exp 1	Exp 2	Exp 3
Bud size	YPR loc	Bud size	YPR loc	Bud size	YPR loc		Bud size	YPR loc	Bud size	YPR loc	Bud size	YPR loc		Bud size	YPR loc	Bud size	YPR loc	Bud size	YPR loc		Bud size	YPR loc	Bud size	YPR loc	Bud size	YPR loc		≤ 1	48	50	53	19	14	22	8	4	6
0	cyto	0	cyto	0	bud/neck		1.02	cyto	1.03	cyto	1.03	cyto		2.06	cyto	2.23	cyto	2.3	cyto		3.06	cyto	3.15	cyto	3.02	cyto		1 > 2	32	30	29	7	8	4	10	10	7
0	puncta	0	cyto	0	puncta		1.07	bud/neck	1.07	cyto	1.07	cyto		2.14	cyto	2.25	cyto	2.38	cyto		3.08	cyto	3.23	bud/neck	3.04	cyto		2 > 3	29	34	20	3	3	7	7	5	8
0	puncta	0	puncta	0	cyto		1.15	cyto	1.08	bud/neck	1.13	bud/neck		2.33	cyto	2.4	cyto	2.42	cyto		3.12	cyto	3.28	bud/neck	3.08	cyto		> 3	9	18	21	7	3	1	21	21	22
0	cyto	0	cyto	0	cyto		1.21	bud/neck	1.15	cyto	1.32	cyto		2.38	cyto	2.45	cyto	2.47	bud/neck		3.13	puncta	3.29	bud/neck	3.22	bud/neck			118	132	123	36	28	34	46	40	43
0	cyto	0	cyto	0	puncta		1.26	cyto	1.3	cyto	1.32	puncta		2.39	puncta	2.53	cyto	2.53	cyto		3.19	bud/neck	3.32	bud/neck	3.29	bud/neck			600
0	cyto	0	cyto	0	puncta		1.3	cyto	1.3	cyto	1.36	cyto		2.44	cyto	2.64	cyto	2.54	bud/neck		3.25	bud/neck	3.36	bud/neck	3.3	cyto
0	puncta	0	puncta	0	puncta		1.32	cyto	1.36	cyto	1.37	puncta		2.49	cyto	2.71	bud/neck	2.62	cyto		3.25	cyto	3.37	cyto	3.31	cyto			cyto			puncta			bud/neck
0	puncta	0	cyto	0	cyto		1.37	puncta	1.37	cyto	1.41	cyto		2.5	cyto	2.74	cyto	2.81	puncta		3.26	bud/neck	3.39	bud/neck	3.34	bud/neck			Exp 1	Exp 2	Exp 3	Exp 1	Exp 2	Exp 3	Exp 1	Exp 2	Exp 3
0	puncta	0	cyto	0	cyto		1.4	cyto	1.39	bud/neck	1.45	cyto		2.54	cyto	2.77	bud/neck	2.82	bud/neck		3.32	cyto	3.44	cyto	3.35	cyto		≤ 1	24	25	26.5	9.5	7	11	4	2	3
0	cyto	0	cyto	0	puncta		1.51	bud/neck	1.41	cyto	1.47	puncta		2.58	cyto	2.79	cyto	2.89	puncta		3.37	cyto	3.46	bud/neck	3.36	cyto		1 > 2	16	15	14.5	3.5	4	2	5	5	3.5
0	cyto	0	cyto	0	puncta		1.51	puncta	1.41	bud/neck	1.55	cyto		2.6	cyto	2.84	cyto	2.92	cyto		3.42	bud/neck	3.47	cyto	3.4	cyto		2 > 3	14.5	17	10	1.5	1.5	3.5	3.5	2.5	4
0	cyto	0	puncta	0	cyto		1.52	bud/neck	1.41	cyto	1.66	bud/neck		2.61	bud/neck	2.92	cyto	2.02	cyto		3.54	cyto	3.53	cyto	3.4	cyto		> 3	4.5	9	10.5	3.5	1.5	0.5	10.5	10.5	11
0	cyto	0	puncta	0	cyto		1.56	cyto	1.46	cyto	1.69	cyto		2.61	cyto	2.92	cyto	2.08	cyto		3.7	bud/neck	3.55	bud/neck	3.44	bud/neck			100
0	cyto	0	cyto	0	cyto		1.61	cyto	1.52	cyto	1.7	cyto		2.68	bud/neck	2.94	cyto	2.21	cyto		3.84	bud/neck	3.57	cyto	3.52	cyto			100
0	cyto	0	cyto	0	cyto		1.61	cyto	1.55	cyto	1.72	cyto		2.76	bud/neck	2.95	cyto	2.26	cyto		3.91	puncta	3.58	bud/neck	3.52	cyto			100
0	cyto	0	cyto	0	puncta		1.65	bud/neck	1.55	cyto	1.75	cyto		2.88	cyto	2.98	cyto	2.29	cyto		4	bud/neck	3.59	bud/neck	3.55	bud/neck
0	cyto	0	cyto	0	cyto		1.66	cyto	1.62	bud/neck	1.76	cyto		2.91	cyto	2.04	cyto	2.3	bud/neck		4.07	bud/neck	3.64	bud/neck	3.55	bud/neck
0	cyto	0	cyto	0	puncta		1.71	cyto	1.64	puncta	1.76	cyto		2.91	cyto	2.07	cyto	2.32	cyto		4.18	bud/neck	3.73	cyto	3.6	cyto
0	cyto	0	cyto	0	cyto		1.71	puncta	1.65	puncta	1.84	bud/neck		2.98	cyto	2.09	cyto	2.39	bud/neck		4.23	bud/neck	3.87	bud/neck	3.6	bud/neck
0	puncta	0	puncta	0	cyto		1.79	bud/neck	1.72	cyto	1.84	bud/neck		2.99	cyto	2.09	cyto	2.41	cyto		3.01	bud/neck	3.88	cyto	3.7	bud/neck
0.1	bud/neck	0	cyto	0	cyto		1.84	cyto	1.79	cyto	1.89	bud/neck		2.02	bud/neck	2.1	puncta	2.44	puncta		3.01	puncta	3.9	cyto	3.74	bud/neck
0.1	bud/neck	0	puncta	0	puncta		1.84	puncta	1.79	cyto	1.92	cyto		2.19	bud/neck	2.13	bud/neck	2.47	bud/neck		3.1	cyto	3.92	cyto	3.76	cyto
0.2	bud/neck	0	cyto	0	puncta		1.95	cyto	1.95	puncta	1.17	cyto		2.22	cyto	2.14	cyto	2.5	cyto		3.1	bud/neck	4.05	bud/neck	3.77	bud/neck
0.3	bud/neck	0	cyto	0	cyto		2	cyto	1.07	cyto	1.23	cyto		2.25	puncta	2.17	puncta	2.51	cyto		3.16	puncta	3.04	cyto	3.78	bud/neck
0.4	cyto	0	puncta	0	puncta		1.08	bud/neck	1.08	puncta	1.24	cyto		2.3	cyto	2.17	cyto	2.62	puncta		3.23	bud/neck	3.05	bud/neck	3.8	bud/neck
0.4	bud/neck	0	cyto	0	puncta		1.1	cyto	1.1	bud/neck	1.26	cyto		2.32	cyto	2.25	cyto	2.62	puncta		3.26	bud/neck	3.07	cyto	4.13	bud/neck
0.5	cyto	0	cyto	0	cyto		1.19	cyto	1.21	puncta	1.37	cyto		2.33	cyto	2.38	puncta	2.64	bud/neck		3.55	bud/neck	3.1	bud/neck	4.22	bud/neck
0.7	cyto	0	cyto	0	cyto		1.19	puncta	1.24	cyto	1.45	cyto		2.38	cyto	2.41	cyto	2.66	cyto		3.71	puncta	3.12	cyto	3.19	puncta
0.7	cyto	0	cyto	0	cyto		1.21	cyto	1.31	puncta	1.52	cyto		2.39	bud/neck	2.44	cyto	2.71	cyto		3.74	bud/neck	3.15	puncta	3.22	cyto
0.7	cyto	0	cyto	0	puncta		1.26	cyto	1.31	bud/neck	1.64	puncta		2.44	cyto	2.45	cyto	2.74	cyto		3.8	bud/neck	3.16	cyto	3.26	bud/neck
0.7	cyto	0.3	cyto	0	cyto		1.26	cyto	1.32	cyto	1.65	cyto		2.47	cyto	2.47	cyto	2.74	cyto		3.87	bud/neck	3.26	cyto	3.26	bud/neck
0.85	bud/neck	0.48	puncta	0.58	bud/neck		1.39	bud/neck	1.37	cyto	1.79	bud/neck		2.49	cyto	2.51	cyto	2.76	cyto		3.88	bud/neck	3.37	bud/neck	3.32	cyto
0.97	bud/neck	0.6	puncta	0.58	bud/neck		1.41	bud/neck	1.37	bud/neck	1.79	cyto		2.53	cyto	2.6	cyto	2.77	puncta		3.89	cyto	3.45	bud/neck	3.35	cyto
0.98	puncta	0.69	puncta	0.63	cyto		1.46	cyto	1.41	bud/neck	1.86	cyto		2.58	cyto	2.6	cyto	2.81	bud/neck		3.93	puncta	3.54	bud/neck	3.35	bud/neck
0.98	cyto	0.79	cyto	0.69	cyto		1.47	puncta	1.42	bud/neck	1.89	bud/neck		2.61	cyto	2.71	bud/neck	2.96	puncta		3.98	bud/neck	3.59	bud/neck	3.59	bud/neck
1	cyto	0.79	cyto	0.69	cyto		1.63	cyto	1.45	cyto	1.89	cyto		2.64	bud/neck	2.76	bud/neck				4	puncta	3.69	puncta	3.59	bud/neck
1	cyto	0.87	cyto	0.85	cyto		1.63	cyto	1.51	cyto	1.93	cyto		2.78	puncta	2.82	cyto				4.02	bud/neck	3.73	cyto	3.6	cyto
0	cyto	0.89	cyto	0.85	bud/neck		1.64	cyto	1.54	puncta	1.95	cyto		2.82	cyto	2.82	cyto						3.77	cyto	3.67	bud/neck
0	cyto	0	puncta	0.87	cyto		1.69	bud/neck	1.55	cyto	1.95	cyto		2.98	cyto	2.88	cyto						3.83	bud/neck	3.7	cyto
0	puncta	0	cyto	0.93	cyto		1.75	cyto	1.55	cyto	1.99	cyto				2.95	cyto						3.91	cyto	3.78	cyto
0	puncta	0	cyto	0	puncta		1.79	cyto	1.58	bud/neck						2.95	cyto						3.93	bud/neck	3.79	cyto
0	cyto	0	cyto	0	cyto		1.79	cyto	1.62	cyto						3	cyto						3.99	puncta	3.9	bud/neck
0	puncta	0	cyto	0	puncta		1.79	cyto	1.68	cyto															3.9	cyto
0	cyto	0	cyto	0	cyto		1.85	cyto	1.76	cyto															4.24	bud/neck
0	puncta	0	cyto	0	cyto		1.89	cyto	1.79	cyto
0	cyto	0	cyto	0	cyto		1.95	cyto	1.85	cyto
0	puncta	0	cyto	0	cyto		1.95	cyto	1.93	puncta
0	puncta	0	cyto	0	cyto		1.99	puncta	1.95	cyto
0	cyto	0	cyto	0	cyto		2	cyto
0	cyto	0	cyto	0	cyto
0	cyto	0	puncta	0	cyto
0	cyto	0	cyto	0	puncta
0	puncta	0	cyto	0	cyto
0	cyto	0	puncta	0	cyto
0	cyto	0	cyto	0	cyto
0	cyto	0	cyto	0	cyto
0	cyto	0	cyto	0	cyto
0	puncta	0	cyto	0	cyto
0	puncta	0	cyto	0	cyto
0	cyto	0	cyto	0	cyto
0	cyto	0.58	puncta	0	cyto
0	puncta	0.65	cyto	0	cyto
0	puncta	0.69	bud/neck	0	cyto
0	cyto	0.78	bud/neck	0	puncta
0	cyto	0.78	bud/neck	0	puncta
0	cyto	0.87	bud/neck	0	puncta
0	cyto	0.97	cyto	0	cyto
0	cyto	1	cyto	0	cyto
0.67	puncta			0	cyto
0.7	bud/neck			0	cyto
0.77	cyto			0	cyto
0.77	cyto			0	puncta
0.83	cyto			0	puncta
0.85	cyto			0	cyto
1	cyto			0.45	cyto
				0.65	bud/neck
				0.66	cyto
				0.66	puncta
				0.76	cyto
				0.89	cyto
				0.89	bud/neck
Cyto	48		50		53			32		30		29			29		34		20			9		18		21
Puncta	19		14		22			7		8		4			3		3		7			7		3		1
Bud/neck	8		4		6			10		10		7			7		5		8			21		21		22
