# Supplementary material for: Systematic analysis of membrane contact sites in Saccharomyces cerevisiae uncovers modulators of cellular lipid distribution
Source: eLife. 2022 Nov 10;11:e74602. doi: 10.7554/eLife.74602 (PMC9648973; doi:10.7554/eLife.74602)
Supplement: Figure 3—source data 1. [file elife-74602-fig3-data1.xlsx]

## Sheet: Sheet1
Figure 3C - Cellular localization of ADH1pr-GFP-YPR097W during mid-logarithmic growth
	Bud / Bud neck	Puncta	Cytosol
Biological replicate 1	56	28	116
Biological replicate 1	51	40	109
Biological replicate 1	56	48	96
