# Supplementary material for: Systematic analysis of membrane contact sites in Saccharomyces cerevisiae uncovers modulators of cellular lipid distribution
Source: eLife. 2022 Nov 10;11:e74602. doi: 10.7554/eLife.74602 (PMC9648973; doi:10.7554/eLife.74602)
Supplement: Figure 3—source data 2. [file elife-74602-fig3-data2.xlsx]

## Sheet: Sheet1
	Lec1-Envy Puncta Per Cell
	Replicate 1	Replicate 2	Replicate 3	Mean	SEM
FLD1	0.0296247	0.09941	0.0958169	0.0749505	0.0226867
fld1𝛥	0.700268	0.743472	0.779316	0.741019	0.022852
