# Supplementary material for: Systematic analysis of membrane contact sites in Saccharomyces cerevisiae uncovers modulators of cellular lipid distribution
Source: eLife. 2022 Nov 10;11:e74602. doi: 10.7554/eLife.74602 (PMC9648973; doi:10.7554/eLife.74602)
Supplement: Figure 3—source data 3. [file elife-74602-fig3-data3.xlsx]

## Sheet: Noise-filtered DHFR Z-Score 
Proteins that are in proximity to Ypr097w by DHFR protein fragment complementation assay
Orf	Name	Noise-filtered DHFR Z-Score	Brief Description
YKR046C	PLN1	18.1563	Perilipin, involved in formation and stability of lipid droplets
YDR276C	PMP3	11.7134	Small plasma membrane protein
YBR041W	FAT1	9.13289	Very long chain fatty acyl-CoA synthetase and fatty acid transporter
YJL151C	SNA3	7.94163	Protein involved in efficient MVB sorting of proteins to the vacuole
YIL124W	AYR1	7.80405	Bifunctional triacylglycerol lipase and 1-acyl DHAP reductase
YMR246W	FAA4	7.80405	Long chain fatty acyl-CoA synthetase
YML008C	ERG6	6.73359	Delta(24)-sterol C-methyltransferase
YER178W	PDA1	6.4685	E1 alpha subunit of the pyruvate dehydrogenase (PDH) complex
YPR108W	RPN7	6.37454	Essential non-ATPase regulatory subunit of the 26S proteasome
YBR002C	RER2	5.56918	Forms the dehydrodolichyl diphosphate synthase (DDS) complex with NUS1
YKL094W	YJU3	5.47186	Monoglyceride lipase (MGL) that hydrolyzes fatty acid ethyl esters
YBR177C	EHT1	5.13294	Acyl-coenzymeA:ethanol O-acyltransferase
YPR133W-A	TOM5	4.54906	Component of the TOM (translocase of outer membrane) complex
YJL024C	APS3	4.53563	Small subunit of the clathrin-associated adaptor complex AP-3
YLL012W	YEH1	4.49201	Steryl ester hydrolase
YHR072W	ERG7	4.38798	Lanosterol synthase
YKL140W	TGL1	4.33765	Steryl ester hydrolase
YNL231C	PDR16	4.23698	Phosphatidylinositol transfer protein (PITP)
YBL028C	YBL028C	3.96517	Protein of unknown function that may interact with ribosomes
YNL336W	COS1	3.95175	Endosomal protein involved in turnover of plasma membrane proteins
YIL041W	GVP36	3.64638	BAR domain protein that localizes to early and late Golgi vesicles
YGL054C	ERV14	3.61954	COPII-coated vesicle protein
YGL195W	GCN1	3.5692	Positive regulator of the Gcn2p kinase activity
YBR204C	LDH1	3.3578	Serine hydrolase
YPR048W	TAH18	3.1531	Conserved NAPDH-dependent diflavin reductase
YGR233C	PHO81	3.0927	Cyclin-dependent kinase (CDK) inhibitor
YBR188C	NTC20	2.98867	Member of the NineTeen Complex (NTC)
YLR063W	BMT6	2.91485	Methyltransferase required for m3U2843 methylation of the 25S rRNA
YBR011C	IPP1	2.90478	Cytoplasmic inorganic pyrophosphatase (PPase)
YPR028W	YOP1	2.89136	Reticulon-interacting protein
YLR326W	YLR326W	2.89136	Putative protein of unknown function
YMR064W	AEP1	2.86787	Protein required for expression of the mitochondrial OLI1 gene
YNL331C	AAD14	2.84102	Putative aryl-alcohol dehydrogenase
YML109W	ZDS2	2.78733	Protein with a role in regulating Swe1p-dependent polarized growth
YOR113W	AZF1	2.74371	Zinc-finger transcription factor
YJL127C	SPT10	2.68666	Histone H3 acetylase with a role in transcriptional regulation
YGR159C	NSR1	2.65982	Nucleolar protein that binds nuclear localization sequences
YMR152W	YIM1	2.62962	Aldehyde reductase involved in detoxification of lignocellulose-derive
YER058W	PET117	2.6229	Assembly factor that couples heme a synthesis to complex IV assembly
YGR263C	SAY1	2.61955	Sterol deacetylase
YLR162W-A	RRT15	2.61284	Putative protein of unknown function
YHR162W	MPC2	2.5927	Highly conserved subunit of the mitochondrial pyruvate carrier (MPC)
YLR250W	SSP120	2.58264	Protein packaged into COPII vesicles for trafficking between ER and Go
YJR034W	PET191	2.57928	Protein required for assembly of cytochrome c oxidase
YDL194W	SNF3	2.57593	Plasma membrane low glucose sensor, regulates glucose transport
YDR233C	RTN1	2.5625	Reticulon protein
YHR213W	YHR213W	2.5625	Pseudogenic fragment with similarity to flocculins
YLL067C	YLL067C	2.54572	Putative Y' element ATP-dependent helicase
YOR165W	SEY1	2.54237	Dynamin-like GTPase that mediates homotypic ER fusion
YLR274W	MCM5	2.52895	Component of the Mcm2-7 hexameric helicase complex
YIL121W	QDR2	2.50546	Plasma membrane transporter of the major facilitator superfamily
YOR279C	RFM1	2.46519	Component of the Sum1p-Rfm1p-Hst1p complex
YIL148W	RPL40A	2.45177	Ubiquitin-ribosomal 60S subunit protein L40A fusion protein
YGR093W	YGR093W	2.43499	Splicing factor that modulates turnover of branched RNAs by Dbr1p
YDR490C	PKH1	2.42828	Serine/threonine protein kinase
YOR183W	FYV12	2.3813	Protein of unknown function
YOL094C	RFC4	2.37123	Subunit of heteropentameric Replication factor C (RF-C)
YKR018C	YKR018C	2.36452	Protein of unknown function
YFR015C	GSY1	2.33432	Glycogen synthase
YBR058C	UBP14	2.33096	Ubiquitin-specific protease
YBR264C	YPT10	2.31754	Rab family GTP-binding protein
YNL248C	RPA49	2.31418	RNA polymerase I subunit A49
YBR152W	SPP381	2.30747	mRNA splicing factor, component of U4/U6.U5 tri-snRNP
YLR189C	ATG26	2.29405	UDP-glucose:sterol glucosyltransferase
YNR051C	BRE5	2.29069	Ubiquitin protease cofactor
YIL055C	YIL055C	2.28734	Putative protein of unknown function
YLR162W	YLR162W	2.28734	Protein of unknown function
YKL161C	YKL161C	2.2672	Protein kinase
YPR160W	GPH1	2.23365	Glycogen phosphorylase required for the mobilization of glycogen
YDL159W	STE7	2.23029	Signal transducing MAP kinase kinase
YMR068W	AVO2	2.22358	Component of a complex containing the Tor2p kinase and other proteins
YMR145C	NDE1	2.21687	Mitochondrial external NADH dehydrogenase
YKL134C	44105	2.21687	Mitochondrial intermediate peptidase
YML041C	VPS71	2.2068	Nucleosome-binding component of the SWR1 complex
YOR065W	CYT1	2.20009	Cytochrome c1
YMR189W	GCV2	2.19002	P subunit of the mitochondrial glycine decarboxylase complex
YHL013C	YHL013C	2.18331	Protein of unknown function
YHR213W-B	YHR213W-B	2.16653	Pseudogenic fragment with similarity to flocculins
YGL215W	CLG1	2.13969	Cyclin-like protein that interacts with Pho85p
YLR394W	CST9	2.12291	SUMO E3 ligase
YKL164C	PIR1	2.12291	O-glycosylated protein required for cell wall stability
YDL232W	OST4	2.11284	Subunit of the oligosaccharyltransferase complex of the ER lumen
YCR086W	CSM1	2.10613	Nucleolar protein that mediates homolog segregation during meiosis I
YNL265C	IST1	2.09942	Protein with positive role in the multivesicular body sorting pathway
YDR293C	SSD1	2.09607	Translational repressor with a role in polar growth and wall integrity
YGR268C	HUA1	2.086	Cytoplasmic protein containing a zinc finger domain
YJR096W	YJR096W	2.06922	Xylose and arabinose reductase
YLR370C	ARC18	2.04909	Subunit of the ARP2/3 complex
YKR017C	YKR017C	2.04573	RING finger ubiquitin ligase (E3)
YJR148W	BAT2	2.04237	Cytosolic branched-chain amino acid (BCAA) aminotransferase
YLR295C	ATP14	2.03231	Subunit h of the F0 sector of mitochondrial F1F0 ATP synthase
YNL272C	SEC2	2.03231	Guanyl-nucleotide exchange factor for the small G-protein Sec4p
YOL056W	GPM3	1.9954	Nonfunctional homolog of Gpm1p phosphoglycerate mutase
YBL093C	ROX3	1.99204	Subunit of the RNA polymerase II mediator complex
YCR004C	YCP4	1.98868	Protein of unknown function
YGR036C	CAX4	1.98533	Dolichyl pyrophosphate (Dol-P-P) phosphatase
YPR066W	UBA3	1.98197	Protein that activates Rub1p (NEDD8) before neddylation
YJL047C-A	YJL047C-A	1.97862	Putative protein of unknown function
YJR130C	STR2	1.96855	Cystathionine gamma-synthase, converts cysteine into cystathionine
YLR053C	YLR053C	1.93835	Putative protein of unknown function
YDR184C	ATC1	1.93499	Nuclear protein
YLR452C	SST2	1.92493	GTPase-activating protein for Gpa1p
YBR215W	HPC2	1.9115	Subunit of the HIR complex
YOR382W	FIT2	1.9115	Mannoprotein that is incorporated into the cell wall
YLR233C	EST1	1.89473	TLC1 RNA-associated factor involved in telomere length regulation
YBR283C	SSH1	1.89473	Subunit of the Ssh1 translocon complex
YPL220W	RPL1A	1.88466	Ribosomal 60S subunit protein L1A
YER100W	UBC6	1.8813	Ubiquitin-conjugating enzyme involved in ERAD
YLR403W	SFP1	1.87795	Regulates transcription of ribosomal protein and biogenesis genes
YDL148C	NOP14	1.87124	Nucleolar protein
YOL078W	AVO1	1.87124	Component of a membrane-bound complex containing the Tor2p kinase
YOL054W	PSH1	1.86452	E3 ubiquitin ligase targeting centromere-binding protein Cse4p
YLR220W	CCC1	1.86452	Vacuolar Fe2+/Mn2+ transporter
YIL043C	CBR1	1.85781	Cytochrome b reductase and NADH-dependent reductase for Dph3p
YKL181W	PRS1	1.83768	5-phospho-ribosyl-1(alpha)-pyrophosphate synthetase
YLR257W	YLR257W	1.83432	Protein of unknown function
YOR284W	HUA2	1.83097	Cytoplasmic protein of unknown function
YBR184W	YBR184W	1.83097	Putative protein of unknown function
YEL007W	YEL007W	1.82761	Transcriptional regulator of pseudohyphal growth
YER186C	YER186C	1.81755	Putative protein of unknown function
YDR016C	DAD1	1.81419	Essential subunit of the Dam1 complex (aka DASH complex)
YJR159W	SOR1	1.80748	Sorbitol dehydrogenase
YER176W	ECM32	1.80748	DNA dependent ATPase/DNA helicase
YOR341W	RPA190	1.79741	RNA polymerase I largest subunit A190
YML087C	YML087C	1.79406	Protein of unknown function, highly conserved across species
YLR100W	ERG27	1.78734	3-keto sterol reductase
YNL061W	NOP2	1.77728	rRNA m5C methyltransferase
YFR024C-A	LSB3	1.77728	Protein containing a C-terminal SH3 domain
YBR033W	EDS1	1.76385	Putative zinc cluster protein, predicted to be a transcription factor
YBR239C	YBR239C	1.7605	Transcriptional regulator
YBR035C	PDX3	1.75379	Pyridoxine (pyridoxamine) phosphate oxidase
YDR245W	MNN10	1.7303	Subunit of a Golgi mannosyltransferase complex
YDL107W	MSS2	1.72359	Peripherally bound inner membrane protein of the mitochondrial matrix
YGR194C	XKS1	1.71688	Xylulokinase
YOR213C	SAS5	1.71688	Subunit of the SAS complex (Sas2p, Sas4p, Sas5p)
YMR319C	FET4	1.71352	Low-affinity Fe(II) transporter of the plasma membrane
YJL011C	RPC17	1.70681	RNA polymerase III subunit C17
YHR111W	UBA4	1.70681	E1-like protein that activates Urm1p before urmylation
YGR274C	TAF1	1.70345	TFIID subunit, involved in RNA pol II transcription initiation
YJR091C	JSN1	1.69339	Member of the Puf family of RNA-binding proteins
YMR037C	MSN2	1.68667	Stress-responsive transcriptional activator
YEL031W	SPF1	1.67996	P-type ATPase, ion transporter of the ER membrane
YPL069C	BTS1	1.67661	Geranylgeranyl diphosphate synthase (GGPPS)
YPL219W	PCL8	1.67661	Cyclin
YMR107W	SPG4	1.67661	Protein required for high temperature survival during stationary phase
YHR074W	QNS1	1.6699	Glutamine-dependent NAD(+) synthetase
YML064C	TEM1	1.66654	GTPase involved in initiation of Mitotic Exit Network (MEN)
YIL164C	NIT1	1.66654	Nitrilase
YBR196C-B	YBR196C-B	1.64641	Putative protein of unknown function
YOR316C	COT1	1.64305	Vacuolar transporter that mediates zinc transport into the vacuole
YFL052W	YFL052W	1.6397	Zinc cluster transcription factor that regulates respiratory growth
YBL090W	MRP21	1.63634	Mitochondrial ribosomal protein of the small subunit
YGL083W	SCY1	1.63634	Putative kinase
YEL017C-A	PMP2	1.62963	Proteolipid associated with plasma membrane H(+)-ATPase (Pma1p)
YLR196W	PWP1	1.62627	Protein with WD-40 repeats involved in rRNA processing
YCR082W	YCR082W	1.62627	Component of the ADA histone acetyltransferase complex
YGL172W	NUP49	1.61956	FG-nucleoporin component of central core of the nuclear pore complex
YOR272W	YTM1	1.61621	Ribosomal assembly factor and 66S pre-ribosomal particle constituent
YFR032C	YFR032C	1.61621	Putative protein of unknown function
YJR139C	HOM6	1.61285	Homoserine dehydrogenase (L-homoserine:NADP oxidoreductase)
YLR028C	ADE16	1.60949	Enzyme of 'de novo' purine biosynthesis
YDR385W	EFT2	1.60949	Elongation factor 2 (EF-2), also encoded by EFT1
YNR015W	SMM1	1.60614	Dihydrouridine synthase
YCR068W	ATG15	1.59607	Phospholipase
YNL014W	HEF3	1.59607	Translational elongation factor EF-3
YPR186C	PZF1	1.58936	Transcription factor IIIA (TFIIIA)
YJL020C	BBC1	1.586	Protein possibly involved in assembly of actin patches
YDR093W	DNF2	1.586	Aminophospholipid translocase (flippase)
YBR058C-A	TSC3	1.58265	Protein that stimulates the activity of serine palmitoyltransferase
YMR126C	DLT1	1.57594	Protein of unknown function
YDL029W	ARP2	1.57258	Essential component of the Arp2/3 complex
YIL062C	ARC15	1.56923	Subunit of the ARP2/3 complex
YDR389W	SAC7	1.56587	GTPase activating protein (GAP) for Rho1p
YCR075W-A	YCR075W-A	1.56587	Subunit of the EGO/GSE complex
YLR024C	UBR2	1.56251	Cytoplasmic ubiquitin-protein ligase (E3)
YBR169C	SSE2	1.5558	Member of Hsp110 subclass of the heat shock protein 70 (HSP70) family
YGR133W	PEX4	1.55245	Peroxisomal ubiquitin conjugating enzyme
YER008C	SEC3	1.55245	Subunit of the exocyst complex
YIL015W	BAR1	1.54238	Aspartyl protease secreted to periplasmic space of mating type a cell
YOL152W	FRE7	1.54238	Putative ferric reductase with similarity to Fre2p
YDR504C	SPG3	1.54238	Protein required for high temperature survival during stationary phase
YAL007C	ERP2	1.53903	Member of the p24 family involved in ER to Golgi transport
YDL059C	RAD59	1.53567	Protein involved DNA double-strand break repair
YCR030C	SYP1	1.53231	Negative regulator of WASP-Arp23 complex
YHR138C	YHR138C	1.52896	Protein of unknown function
YBR165W	UBS1	1.52896	Ubiquitin-conjugating enzyme suppressor that regulates Cdc34p
YJR119C	YJR119C	1.52896	JmjC domain family histone demethylase
YLR319C	BUD6	1.5256	Actin- and formin-interacting protein
YML096W	YML096W	1.5256	Putative protein with similarity to asparagine synthetases
YBR161W	CSH1	1.51889	Mannosylinositol phosphorylceramide (MIPC) synthase catalytic subunit
YOL148C	SPT20	1.51218	Subunit of the SAGA transcriptional regulatory complex
YDL208W	NHP2	1.50882	Protein related to mammalian high mobility group (HMG) proteins
YDL018C	ERP3	1.50882	Protein with similarity to Emp24p and Erv25p
YHR205W	SCH9	1.50882	AGC family protein kinase
YML012W	ERV25	1.50882	Member of the p24 family involved in ER to Golgi transport
YER078C	YER078C	1.50882	Mitochondrial aminopeptidase
YKL209C	STE6	1.50547	Plasma membrane ATP-binding cassette (ABC) transporter
YHR039C-A	VMA10	1.50211	Subunit G of the V1 peripheral membrane domain of V-ATPase
YBR263W	SHM1	1.48869	Mitochondrial serine hydroxymethyltransferase
YKL069W	YKL069W	1.48869	Methionine-R-sulfoxide reductase
YPR040W	TIP41	1.48533	Protein that interacts with Tap42p, which regulates PP2A
YNL029C	KTR5	1.47862	Putative mannosyltransferase involved in protein glycosylation
YCR024C-A	PMP1	1.47862	Regulatory subunit for the plasma membrane H(+)-ATPase Pma1p
YCR043C	YCR043C	1.47191	Putative protein of unknown function
YOR260W	GCD1	1.46856	Gamma subunit of the translation initiation factor eIF2B
YLR429W	CRN1	1.4652	Coronin
YMR191W	SPG5	1.4652	Protein required for proteasome assembly during quiescence
YDR197W	CBS2	1.46185	Mitochondrial translational activator of the COB mRNA
YDL233W	YDL233W	1.46185	Regulator of filamentous growth
YLR284C	ECI1	1.45849	Peroxisomal delta3,delta2-enoyl-CoA isomerase
YKR084C	HBS1	1.45849	GTPase with similarity to translation release factors
YJR134C	SGM1	1.45849	Protein of unknown function
YLL051C	FRE6	1.45513	Putative ferric reductase with similarity to Fre2p
YKR028W	SAP190	1.44842	Protein that forms a complex with the Sit4p protein phosphatase
YBR228W	SLX1	1.44171	Endonuclease involved in DNA recombination and repair
YPL203W	TPK2	1.435	cAMP-dependent protein kinase catalytic subunit
YGL012W	ERG4	1.43164	C-24(28) sterol reductase
YKR059W	TIF1	1.43164	Translation initiation factor eIF4A
YCR071C	IMG2	1.42493	Mitochondrial ribosomal protein of the large subunit
YHR110W	ERP5	1.42493	Protein with similarity to Emp24p and Erv25p
YDR235W	PRP42	1.41822	U1 snRNP protein involved in splicing
YKR016W	FMP13	1.41487	Component of the MICOS complex
YLR166C	SEC10	1.41151	Essential 100kDa subunit of the exocyst complex
YMR297W	PRC1	1.41151	Vacuolar carboxypeptidase Y (proteinase C, CPY)
YBR235W	YBR235W	1.41151	Vacuolar membrane cation-chloride cotransporter (CCC)
YCR075C	ERS1	1.4048	Protein involved in cystine transport
YAR042W	SWH1	1.4048	Protein similar to mammalian oxysterol-binding protein
YPL209C	IPL1	1.40144	Aurora kinase of chromosomal passenger complex
YPR036W-A	YPR036W-A	1.39473	Small (67 amino acids) protein involved in sporulation
YML036W	YML036W	1.39473	Component of the EKC/KEOPS complex
YER073W	ALD5	1.39138	Mitochondrial aldehyde dehydrogenase
YLL007C	YLL007C	1.39138	Homolog of mammalian ELMO (Engulfment and celL MOtility)
YDR104C	SPO71	1.38802	Meiosis-specific protein required for prospore membrane morphogenesis
YER163C	YER163C	1.38802	Gamma-glutamyl cyclotransferase
YDR103W	STE5	1.38466	Pheromone-responsive MAPK scaffold protein
YLR413W	YLR413W	1.38466	Protein of unknown function
YHR056C	RSC30	1.38131	Component of the RSC chromatin remodeling complex
YMR077C	VPS20	1.37795	Myristoylated subunit of the ESCRT-III complex
YNL241C	ZWF1	1.37124	Glucose-6-phosphate dehydrogenase (G6PD)
YBL111C	YBL111C	1.37124	Helicase-like protein encoded within the telomeric Y' element
YOR281C	PLP2	1.36789	Protein that interacts with the CCT complex to stimulate actin folding
YKL166C	TPK3	1.36118	cAMP-dependent protein kinase catalytic subunit
YLR262C-A	YLR262C-A	1.36118	Protein of unknown that associates with ribosomes
YMR267W	PPA2	1.35111	Mitochondrial inorganic pyrophosphatase
YHR197W	RIX1	1.35111	Component of the Rix1 complex and possibly pre-replicative complexes
YDL079C	MRK1	1.34775	Glycogen synthase kinase 3 (GSK-3) homolog
YNL213C	YNL213C	1.34775	Protein of unknown function
YBL015W	ACH1	1.34775	Protein with CoA transferase activity
YER060W-A	FCY22	1.34775	Putative purine-cytosine permease
YPR111W	DBF20	1.3444	Ser/Thr kinase involved in late nuclear division
YML120C	NDI1	1.3444	NADH:ubiquinone oxidoreductase
YLR389C	STE23	1.33433	Metalloprotease
YJL042W	MHP1	1.33097	Microtubule-associated protein involved in microtubule organization
YLR312W-A	MRPL15	1.33097	Mitochondrial ribosomal protein of the large subunit
YPL045W	VPS16	1.33097	Subunit of the HOPS and the CORVET complexes
YOR115C	TRS33	1.33097	Core component of TRAPP complexes I, II and IV
YNL258C	DSL1	1.33097	Peripheral membrane protein needed for Golgi-to-ER retrograde traffic
YHR012W	VPS29	1.32426	Subunit of the membrane-associated retromer complex
YER023W	PRO3	1.32091	Delta 1-pyrroline-5-carboxylate reductase
YER042W	MXR1	1.31755	Methionine-S-sulfoxide reductase
YOR158W	PET123	1.31755	Mitochondrial ribosomal protein of the small subunit
YCR014C	POL4	1.3142	DNA polymerase IV
YHR103W	SBE22	1.3142	Protein involved in bud growth
YIL108W	YIL108W	1.3142	Putative metalloendopeptidase
YPL170W	DAP1	1.31084	Heme-binding protein
YGR144W	THI4	1.30748	Thiazole synthase
YLR085C	ARP6	1.30413	Actin-related protein that binds nucleosomes
YOR377W	ATF1	1.30077	Alcohol acetyltransferase
YOR084W	YOR084W	1.30077	Peroxisomal matrix-localized lipase
YOR155C	ISN1	1.30077	Inosine 5'-monophosphate (IMP)-specific 5'-nucleotidase
YHL015W-A	YHL015W-A	1.30077	Putative protein of unknown function
YHR155W	YHR155W	1.29742	Putative sterol transfer protein
YER056C	FCY2	1.29406	Purine-cytosine permease
YJL054W	TIM54	1.28399	Component of the mitochondrial TIM22 complex
YNL041C	COG6	1.28399	Component of the conserved oligomeric Golgi complex
YBR302C	COS2	1.28399	Endosomal protein involved in turnover of plasma membrane proteins
YGR081C	SLX9	1.27393	Protein required for pre-rRNA processing
YLR159W	YLR159W	1.27393	Putative protein of unknown function
YKL133C	YKL133C	1.27057	Mitochondrial protein of unknown function
YBR282W	MRPL27	1.26722	Mitochondrial ribosomal protein of the large subunit
YKL193C	SDS22	1.26386	Regulatory subunit of the type 1 protein phosphatase (PP1) Glc7p
YMR202W	ERG2	1.25715	C-8 sterol isomerase
YJR117W	STE24	1.25715	Highly conserved zinc metalloprotease
YOR273C	TPO4	1.25715	Polyamine transporter of the major facilitator superfamily
YDR484W	VPS52	1.25379	Component of the GARP (Golgi-associated retrograde protein) complex
YLR381W	CTF3	1.24708	Outer kinetochore protein that forms a complex with Mcm16p and Mcm22p
YJR076C	CDC11	1.24037	Component of the septin ring that is required for cytokinesis
YBR122C	MRPL36	1.24037	Mitochondrial ribosomal protein of the large subunit
YDR038C	ENA5	1.24037	Protein with similarity to P-type ATPase sodium pumps
YGR280C	PXR1	1.23702	Essential protein involved in rRNA and snoRNA maturation
YLR020C	YLR020C	1.23366	Steryl ester hydrolase
YAL036C	FUN11	1.23366	Member of the DRG family of GTP-binding proteins
YAL032C	PRP45	1.2303	Protein required for pre-mRNA splicing
YLR363C	NMD4	1.2303	Protein that may be involved in nonsense-mediated mRNA decay
YGR169C	PUS6	1.2303	tRNA:pseudouridine synthase
YOR196C	LIP5	1.22024	Protein involved in biosynthesis of the coenzyme lipoic acid
YAL011W	SWC1	1.21688	Protein of unknown function
YMR274C	RCE1	1.21688	Type II CAAX prenyl protease
YLR066W	SPC3	1.21353	Subunit of signal peptidase complex
YMR222C	FSH2	1.21017	Putative serine hydrolase that localizes to the cytoplasm
YAL048C	GON1	1.20681	Outer mitochondrial membrane GTPase, subunit of the ERMES complex
YOR129C	YOR129C	1.20346	Arf3p polarization-specific docking factor
YDR279W	RNH202	1.2001	Ribonuclease H2 subunit
YDR473C	PRP3	1.2001	Splicing factor
YDR160W	SSY1	1.2001	Component of the SPS plasma membrane amino acid sensor system
YNR007C	ATG3	1.19675	E2-like enzyme
YFL014W	HSP12	1.19675	Plasma membrane protein involved in maintaining membrane organization
YOR329C	SCD5	1.19339	Protein required for normal actin organization and endocytosis
YEL011W	GLC3	1.19004	Glycogen branching enzyme, involved in glycogen accumulation
YBR078W	ECM33	1.18668	GPI-anchored protein involved in efficient glucose uptake
YAL023C	PMT2	1.18332	Protein O-mannosyltransferase of the ER membrane
YKL061W	YKL061W	1.18332	Subunit of the BLOC-1 complex involved in endosomal maturation
YMR234W	RNH1	1.17997	Ribonuclease H1
YAL053W	YAL053W	1.17997	Putative calcium channel involved in calcium release under hypotonic
YHR212W-A	YHR212W-A	1.17997	Pseudogenic fragment with similarity to flocculins
YDR258C	HSP78	1.17661	Oligomeric mitochondrial matrix chaperone
YGR128C	UTP8	1.17661	Nucleolar protein required for export of tRNAs from the nucleus
YOR037W	CYC2	1.17661	Mitochondrial peripheral inner membrane protein
YJR010C-A	SPC1	1.17661	Subunit of the signal peptidase complex (SPC)
YNL038W	GPI15	1.17661	Protein involved in the synthesis of GlcNAc-PI
YLR065C	YLR065C	1.17661	Protein involved in SRP-independent targeting of substrates to the ER
YBR200W-A	YBR200W-A	1.1699	Putative protein of unknown function
YBR217W	ATG12	1.16655	Ubiquitin-like modifier involved in autophagy and the Cvt pathway
YHR058C	MED6	1.16655	Subunit of the RNA polymerase II mediator complex
YMR170C	ALD2	1.16319	Cytoplasmic aldehyde dehydrogenase
YER060W	FCY21	1.16319	Putative purine-cytosine permease
YPL008W	CHL1	1.15984	Probable DNA helicase
YLL013C	PUF3	1.15984	Protein of the mitochondrial outer surface
YPL118W	MRP51	1.15648	Mitochondrial ribosomal protein of the small subunit
YGL095C	VPS45	1.14641	Protein of the Sec1p/Munc-18 family
YJL001W	PRE3	1.1397	Beta 1 subunit of the 20S proteasome
YDR289C	RTT103	1.1397	Protein involved in transcription termination by RNA polymerase II
YBR289W	SNF5	1.1397	Subunit of the SWI/SNF chromatin remodeling complex
YGL246C	RAI1	1.13635	Nuclear protein with decapping endonuclease activity
YGR253C	PUP2	1.13299	Alpha 5 subunit of the 20S proteasome
YNL252C	MRPL17	1.13299	Mitochondrial ribosomal protein of the large subunit
YPL172C	COX10	1.12963	Heme A:farnesyltransferase
YCL001W-A	YCL001W-A	1.12628	Putative protein of unknown function
YDR302W	GPI11	1.11621	ER membrane protein involved in a late step of GPI anchor assembly
YLR032W	RAD5	1.11286	DNA helicase/Ubiquitin ligase
YPL123C	RNY1	1.11286	Vacuolar RNase of the T(2) family
YGR266W	YGR266W	1.11286	Protein of unknown function
YIL077C	YIL077C	1.11286	Protein that associates with the large mitoribosomal subunit
YML083C	YML083C	1.11286	Protein of unknown function
YLR164W	YLR164W	1.11286	Putative alternate subunit of succinate dehydrogenase (SDH)
YIL117C	PRM5	1.1095	Pheromone-regulated protein, predicted to have 1 transmembrane segment
YMR276W	DSK2	1.10614	Nuclear-enriched ubiquitin-like polyubiquitin-binding protein
YNR052C	POP2	1.10279	RNase of the DEDD superfamily
YHL003C	LAG1	1.10279	Ceramide synthase component
YML067C	ERV41	1.10279	Protein localized to COPII-coated vesicles
YBR166C	TYR1	1.10279	Prephenate dehydrogenase involved in tyrosine biosynthesis
YJR042W	NUP85	1.09943	Subunit of the Nup84p subcomplex of the nuclear pore complex (NPC)
YMR306W	FKS3	1.09943	Protein involved in spore wall assembly
YGR195W	SKI6	1.09608	Exosome non-catalytic core component
YKR105C	YKR105C	1.09608	Plasma membrane protein of the Major Facilitator Superfamily (MFS)
YKL220C	FRE2	1.09272	Ferric reductase and cupric reductase
YCR076C	YCR076C	1.09272	Proteasome-binding protein
YNL023C	FAP1	1.08937	Protein that binds to Fpr1p
YLR150W	STM1	1.08601	Protein required for optimal translation under nutrient stress
YKR064W	YKR064W	1.08601	Putative transcriptional repressor with Zn(2)-Cys(6) finger
YPL111W	CAR1	1.0793	Arginase, catabolizes arginine to ornithine and urea
YPL047W	SGF11	1.0793	Integral subunit of SAGA histone acetyltransferase complex
YPR191W	QCR2	1.07594	Subunit 2 of ubiquinol cytochrome-c reductase (Complex III)
YBR296C-A	YBR296C-A	1.07259	Inhibitor of the Anaphase-Promoting Complex/Cyclosome (APC/C)
YER184C	YER184C	1.07259	Transcriptional activator of oleate genes
YOR191W	RIS1	1.06923	Swi2/Snf2-related translocase, SUMO-Targeted Ubiquitin Ligase (STUbL)
YDR472W	TRS31	1.06923	Core component of transport protein particle (TRAPP) complexes I-III
YBR220C	YBR220C	1.06923	Putative protein of unknown function
YIL146C	ECM37	1.06588	Mitochondrial outer membrane protein required to initiate mitophagy
YBR221C	PDB1	1.06588	E1 beta subunit of the pyruvate dehydrogenase (PDH) complex
YHR059W	FYV4	1.06588	Protein of unknown function
YLR064W	YLR064W	1.06588	Protein that localizes to the endoplasmic reticulum
YEL055C	POL5	1.06252	Protein involved in 60S assembly and pre-40S AFs recycling
YLR237W	THI7	1.06252	Plasma membrane transporter responsible for the uptake of thiamine
YPL138C	SPP1	1.05581	Subunit of COMPASS (Set1C)
YBL022C	PIM1	1.05245	ATP-dependent Lon protease
YPR036W	VMA13	1.05245	Subunit H of the V1 peripheral membrane domain of V-ATPase
YGL038C	OCH1	1.05245	Mannosyltransferase of the cis-Golgi apparatus
YKL010C	UFD4	1.05245	Ubiquitin-protein ligase (E3)
YCR007C	YCR007C	1.05245	Putative integral membrane protein
YDR204W	COQ4	1.0491	Protein with a role in ubiquinone (Coenzyme Q) biosynthesis
YGR262C	BUD32	1.0491	Protein kinase
YCL029C	BIK1	1.04574	Microtubule-associated protein
YPR193C	HPA2	1.04239	Tetrameric histone acetyltransferase
YNL309W	STB1	1.03903	Protein with role in regulation of MBF-specific transcription at Start
YPL152W	RRD2	1.03903	Peptidyl-prolyl cis/trans-isomerase
YFR038W	YFR038W	1.03903	Putative ATPase containing the DEAD/H helicase-related sequence motif
YER078W-A	YER078W-A	1.03568	Putative protein of unknown function
YBR086C	IST2	1.02896	Cortical ER protein involved in ER-plasma membrane tethering
YIL090W	YIL090W	1.02896	Integral ER membrane protein with type-III transmembrane domains
YBR262C	FMP51	1.02561	Component of the MICOS complex
YLR240W	VPS34	1.0189	Phosphatidylinositol (PI) 3-kinase that synthesizes PI-3-phosphate
YHR077C	NMD2	1.0189	Protein involved in the nonsense-mediated mRNA decay (NMD) pathway
YBR066C	NRG2	1.0189	Transcriptional repressor
YIR036C	YIR036C	1.0189	Putative benzil reductase
YNL277W	MET2	1.01554	L-homoserine-O-acetyltransferase
YEL012W	UBC8	1.01554	Ubiquitin-conjugating enzyme that regulates gluconeogenesis
YCL032W	STE50	1.01219	Adaptor protein for various signaling pathways
YNL147W	LSM7	1.00883	Lsm (Like Sm) protein
YHL008C	YHL008C	1.00883	Putative protein of unknown function
YHL010C	YHL010C	1.00883	Protein of unknown function required for growth on ethanol
YER185W	YER185W	1.00883	Plasma membrane protein involved in protoprophyrin and heme transport
YMR003W	YMR003W	1.00883	Protein of unknown function
YLL014W	YLL014W	1.00883	Member of conserved ER transmembrane complex
YOL010W	RCL1	1.00547	Endonuclease that cleaves pre-rRNA at site A2 for 18S rRNA biogenesis
YCL057W	PRD1	1.00547	Zinc metalloendopeptidase
YHR094C	HXT1	1.00547	Low-affinity glucose transporter of the major facilitator superfamily
YKL121W	YKL121W	1.00547	Protein of unknown function
YDL085W	NDE2	1.00212	Mitochondrial external NADH dehydrogenase
YDR322C-A	TIM11	1.00212	Subunit e of mitochondrial F1F0-ATPase
YOR092W	ECM3	0.995408	Non-essential protein of unknown function
YJL073W	JEM1	0.995408	DnaJ-like chaperone required for nuclear membrane fusion during mating
YOR206W	NOC2	0.995408	Protein involved in ribosome biogenesis
YPL188W	POS5	0.992052	Mitochondrial NADH kinase
YDR159W	SAC3	0.988696	mRNA export factor
YJL081C	ARP4	0.988696	Nuclear actin-related protein involved in chromatin remodeling
YKR080W	MTD1	0.988696	NAD-dependent 5,10-methylenetetrahydrafolate dehydrogenase
YBR295W	PCA1	0.985341	Cadmium transporting P-type ATPase
YHR028C	DAP2	0.985341	Dipeptidyl aminopeptidase
YOR132W	VPS17	0.981985	Subunit of the membrane-associated retromer complex
YGR250C	YGR250C	0.975274	Putative RNA binding protein
YKR101W	SIR1	0.971918	Protein involved in silencing at mating-type loci HML and HMR
YDL146W	YDL146W	0.971918	Protein involved in the regulation of endocytosis
YIL087C	YIL087C	0.971918	Protein of unknown function
YBR164C	ARL1	0.968562	Soluble GTPase with a role in regulation of membrane traffic
YFR040W	SAP155	0.968562	Protein required for function of the Sit4p protein phosphatase
YOR266W	PNT1	0.968562	Mitochondrial integral inner membrane protein
YNL048W	ALG11	0.968562	Alpha-1,2-mannosyltransferase
YNR060W	FRE4	0.968562	Ferric reductase
YDR068W	DOS2	0.965207	Protein of unknown function
YBR155W	CNS1	0.961851	TPR-containing co-chaperone
YKR085C	MRPL20	0.961851	Mitochondrial ribosomal protein of the large subunit
YNL253W	TEX1	0.961851	Protein involved in mRNA export
YCR096C	HMRA2	0.961851	Silenced copy of a2 at HMR
YJL087C	TRL1	0.958495	tRNA ligase
YAL059W	ECM1	0.958495	Pre-ribosomal factor involved in 60S ribosomal protein subunit export
YGR076C	MRPL25	0.958495	Mitochondrial ribosomal protein of the large subunit
YPL154C	PEP4	0.958495	Vacuolar aspartyl protease (proteinase A)
YMR013C	SEC59	0.958495	Dolichol kinase
YGL001C	ERG26	0.95514	C-3 sterol dehydrogenase
YGR244C	LSC2	0.95514	Beta subunit of succinyl-CoA ligase
YIL102C	YIL102C	0.95514	Putative protein of unknown function
YPL106C	SSE1	0.951784	ATPase component of heat shock protein Hsp90 chaperone complex
YHR022C	YHR022C	0.951784	Putative protein of unknown function
YEL023C	YEL023C	0.951784	Putative protein of unknown function
YML050W	YML050W	0.951784	Protein of unknown function
YNL186W	UBP10	0.948428	Ubiquitin-specific protease, deubiquitinates Ub-protein moieties
YBR298C-A	YBR298C-A	0.948428	Putative protein of unknown function
YOR156C	NFI1	0.945073	SUMO E3 ligase
YOR150W	MRPL23	0.945073	Mitochondrial ribosomal protein of the large subunit
YHR131C	YHR131C	0.945073	Putative protein of unknown function
YLR330W	CHS5	0.941717	Component of the exomer complex
YDR206W	EBS1	0.941717	Protein involved in translation inhibition and nonsense-mediated decay
YFR031C-A	RPL2A	0.941717	Ribosomal 60S subunit protein L2A
YDR348C	YDR348C	0.941717	Protein of unknown function thought to be involved in endocytosis
YLR438C-A	LSM3	0.938361	Lsm (Like Sm) protein
YLR449W	FPR4	0.938361	Peptidyl-prolyl cis-trans isomerase (PPIase)
YLR135W	SLX4	0.935006	Endonuclease involved in processing DNA
YDL047W	SIT4	0.935006	Ceramide-activated, type 2A-related serine-threonine phosphatase
YKL150W	MCR1	0.935006	Mitochondrial NADH-cytochrome b5 reductase
YLR165C	PUS5	0.93165	Pseudouridine synthase
YGR287C	YGR287C	0.93165	Major isomaltase (alpha-1,6-glucosidase/alpha-methylglucosidase)
YIR005W	IST3	0.928294	Component of the U2 snRNP
YDR176W	NGG1	0.928294	Subunit of chromatin modifying histone acetyltransferase complexes
YAR066W	YAR066W	0.928294	Putative GPI protein
YPL246C	RBD2	0.928294	Possible rhomboid protease
YFR021W	ATG18	0.924939	Phosphoinositide binding protein
YIL091C	YIL091C	0.924939	Nucleolar protein
YKL067W	YNK1	0.921583	Nucleoside diphosphate kinase
YDR254W	CHL4	0.918227	Outer kinetochore protein required for chromosome stability
YLR383W	RHC18	0.918227	Subunit of the SMC5-SMC6 complex
YPL175W	SPT14	0.918227	UDP-glycosyltransferase subunit of the GPI-GnT complex
YER016W	BIM1	0.914872	Microtubule plus end-tracking protein
YMR127C	SAS2	0.914872	Histone acetyltransferase (HAT) catalytic subunit of the SAS complex
YDR040C	ENA1	0.914872	P-type ATPase sodium pump
YMR096W	SNZ1	0.914872	Subunit of a two-component pyridoxal-5‚Äô-phosphate synthase
YJL100W	LSB6	0.90816	Type II phosphatidylinositol 4-kinase
YDL224C	WHI4	0.90816	Putative RNA binding protein
YDL204W	RTN2	0.90816	Reticulon protein
YGR106C	YGR106C	0.90816	ER protein that functions in assembly of the V0 sector of V-ATPase
YOL072W	THP1	0.904805	Nuclear pore-associated protein
YKR058W	GLG1	0.904805	Glycogenin glucosyltransferase
YGL064C	MRH4	0.904805	Mitochondrial ATP-dependent RNA helicase of the DEAD-box family
YKL090W	CUE2	0.904805	Ubiquitin-binding endonuclease involved in mRNA decay
YMR002W	YMR002W	0.904805	Mitochondrial intermembrane space protein
YDR181C	SAS4	0.901449	Subunit of the SAS complex (Sas2p, Sas4p, Sas5p)
YLR436C	ECM30	0.901449	Protein of unknown function
YIL089W	YIL089W	0.901449	Protein of unknown function found in the ER and vacuole lumen
YOR217W	RFC1	0.898093	Subunit of heteropentameric Replication factor C (RF-C)
YMR039C	SUB1	0.898093	Transcriptional regulator
YGR155W	CYS4	0.898093	Cystathionine beta-synthase
YLL041C	SDH2	0.894738	Iron-sulfur protein subunit of succinate dehydrogenase
YBR055C	PRP6	0.894738	Splicing factor
YJL141C	YAK1	0.894738	Serine-threonine protein kinase
YPR051W	MAK3	0.894738	Catalytic subunit of the NatC type N-terminal acetyltransferase (NAT)
YKR061W	KTR2	0.891382	Mannosyltransferase involved in N-linked protein glycosylation
YKR023W	YKR023W	0.891382	Subunit of ribosome-associated quality control trigger complex (RQT)
YOL002C	YOL002C	0.888026	Plasma membrane receptor for plant antifungal osmotin
YGL063W	PUS2	0.884671	Mitochondrial tRNA:pseudouridine synthase
YLR093C	NYV1	0.884671	v-SNARE component of the vacuolar SNARE complex
YGR149W	YGR149W	0.884671	Glycerophosphocholine acyltransferase (GPCAT)
YHR209W	YHR209W	0.884671	S-AdoMet-dependent methyltransferase involved in lipid homeostasis
YPL043W	NOP4	0.881315	Nucleolar protein
YMR138W	CIN4	0.877959	GTP-binding protein involved in beta-tubulin (Tub2p) folding
YGL040C	HEM2	0.877959	Aminolevulinate dehydratase
YER113C	YER113C	0.877959	Protein with a role in cellular adhesion and filamentous growth
YLR210W	CLB4	0.874604	B-type cyclin involved in cell cycle progression
YMR300C	ADE4	0.874604	Phosphoribosylpyrophosphate amidotransferase (PRPPAT)
YGL179C	TOS3	0.874604	Protein kinase
YDR368W	YPR1	0.874604	NADPH-dependent aldo-keto reductase
YFR030W	MET10	0.874604	Subunit alpha of assimilatory sulfite reductase
YGR236C	SPG1	0.874604	Protein required for high temperature survival during stationary phase
YHR142W	CHS7	0.871248	Protein of unknown function
YAR071W	PHO11	0.867892	One of three repressible acid phosphatases
YPR005C	HAL1	0.864537	Cytoplasmic protein involved in halotolerance
YHR159W	YHR159W	0.864537	Putative protein of unknown function
YIL096C	YIL096C	0.864537	Methyltransferase required for m3U2634 methylation of the 25S rRNA
YDL207W	GLE1	0.861181	Cytoplasmic nucleoporin required for polyadenylated mRNA export
YLR021W	YLR021W	0.861181	Component of a heterodimeric Poc4p-Irc25p chaperone
YIR008C	PRI1	0.857825	Subunit of DNA primase
YGL043W	DST1	0.857825	General transcription elongation factor TFIIS
YER034W	YER034W	0.857825	Protein of unknown function
YLR154C-G	YLR154C-G	0.857825	Putative protein of unknown function
YDR452W	PPN1	0.851114	Dual endo- and exopolyphosphatase with a role in phosphate metabolism
YER145C	FTR1	0.847758	High affinity iron permease
YBR040W	FIG1	0.847758	Integral membrane protein required for efficient mating
YMR292W	GOT1	0.847758	Homodimeric protein that is packaged into COPII vesicles
YPL281C	ERR2	0.847758	Enolase, a phosphopyruvate hydratase
YBR231C	AOR1	0.844403	Component of the SWR1 complex
YGR221C	TOS2	0.844403	Protein involved in localization of Cdc24p to the site of bud growth
YPR190C	RPC82	0.841047	RNA polymerase III subunit C82
YNL293W	MSB3	0.841047	Rab GTPase-activating protein
YBR219C	YBR219C	0.841047	Putative protein of unknown function
YKL091C	YKL091C	0.841047	Putative phosphatidylinositol/phosphatidylcholine transfer protein
YIL159W	BNR1	0.837691	Formin
YLR080W	EMP46	0.837691	Integral membrane component of ER-derived COPII-coated vesicles
YPL010W	RET3	0.837691	Zeta subunit of the coatomer complex (COPI)
YNL206C	RTT106	0.834336	Histone chaperone
YDL202W	MRPL11	0.834336	Mitochondrial ribosomal protein of the large subunit
YLR023C	YLR023C	0.834336	Membrane protein involved in zinc ion homeostasis
YLR069C	MEF1	0.834336	Mitochondrial elongation factor involved in translational elongation
YDR501W	PLM2	0.83098	Putative transcription factor, contains Forkhead Associated domain
YMR266W	RSN1	0.83098	Membrane protein of unknown function
YML119W	YML119W	0.83098	Putative protein of unknown function
YIR033W	MGA2	0.827625	ER membrane protein involved in regulation of OLE1 transcription
YML133C	YML133C	0.827625	Putative Y' element ATP-dependent helicase
YNL262W	POL2	0.824269	Catalytic subunit of DNA polymerase (II) epsilon
YGL119W	ABC1	0.824269	ATPase required for ubiquinone biosynthesis and respiratory growth
YBR021W	FUR4	0.824269	Plasma membrane localized uracil permease
YML030W	YML030W	0.820913	Cytochrome c oxidase subunit
YMR030W-A	YMR030W-A	0.820913	Putative protein of unknown function
YNL128W	TEP1	0.817558	PTEN homolog with no demonstrated inositol lipid phosphatase activity
YDR089W	YDR089W	0.817558	Novel subunit of the vacuolar transporter chaperone complex
YDL025C	YDL025C	0.817558	Putative protein kinase, potentially phosphorylated by Cdc28p
YDL043C	PRP11	0.814202	Subunit of the SF3a splicing factor complex
YNL286W	CUS2	0.814202	Putative checkpoint factor in transcription
YMR232W	FUS2	0.814202	Cell fusion regulator
YDR231C	COX20	0.810846	Mitochondrial inner membrane protein
YDR494W	RSM28	0.810846	Mitochondrial ribosomal protein of the small subunit
YER147C	SCC4	0.807491	Subunit of cohesin loading factor (Scc2p-Scc4p)
YER155C	BEM2	0.807491	Rho GTPase activating protein (RhoGAP)
YJL196C	ELO1	0.807491	Elongase I, medium-chain acyl elongase
YMR033W	ARP9	0.807491	Component of both the SWI/SNF and RSC chromatin remodeling complexes
YER103W	SSA4	0.804135	Heat shock protein that is highly induced upon stress
YLR266C	PDR8	0.804135	Transcription factor
YLR306W	UBC12	0.804135	Enzyme that mediates the conjugation of Rub1p
YLL040C	VPS13	0.804135	Protein involved in prospore membrane morphogenesis
YML037C	YML037C	0.804135	Putative protein of unknown function
YDL076C	RXT3	0.800779	Component of the Rpd3L histone deacetylase complex
YER053C-A	YER053C-A	0.800779	Protein of unknown function
YGR153W	YGR153W	0.800779	Putative protein of unknown function
YJL033W	HCA4	0.797424	DEAD box RNA helicase
YGL002W	ERP6	0.797424	Member of the p24 family involved in ER to Golgi transport
YLR332W	MID2	0.794068	O-glycosylated plasma membrane protein
YGR170W	PSD2	0.794068	Phosphatidylserine decarboxylase of the Golgi and vacuolar membranes
YJL071W	ARG2	0.794068	Acetylglutamate synthase (glutamate N-acetyltransferase)
YLR328W	NMA1	0.794068	Nicotinic acid mononucleotide adenylyltransferase
YML091C	RPM2	0.790712	Protein subunit of mitochondrial RNase P
YER066W	YER066W	0.790712	Putative protein of unknown function
YCR072C	YCR072C	0.787357	Ribosomal large subunit (60S) assembly factor
YJR054W	YJR054W	0.787357	Potassium transporter that mediates K+ influx
YDL226C	GCS1	0.784001	ADP-ribosylation factor GTPase activating protein (ARF GAP)
YOR201C	PET56	0.784001	Ribose methyltransferase
YJL098W	SAP185	0.784001	Protein that forms a complex with the Sit4p protein phosphatase
YBR168W	PEX32	0.784001	Peroxisomal integral membrane protein
YPL099C	FMP14	0.784001	F1F0 ATPase synthase peripheral stalk assembly factor
YKL137W	YKL137W	0.784001	Copper-binding protein of the mitochondrial intermembrane space
YGL025C	PGD1	0.780645	Subunit of the RNA polymerase II mediator complex
YPR128C	ANT1	0.780645	Peroxisomal adenine nucleotide transporter
YGR165W	MRPS35	0.780645	Mitochondrial ribosomal protein of the small subunit
YHL047C	ARN2	0.780645	Transporter
YDR237W	MRPL7	0.77729	Mitochondrial ribosomal protein of the large subunit
YKL038W	RGT1	0.773934	Glucose-responsive transcription factor
YIL092W	YIL092W	0.773934	Putative protein of unknown function
YIL132C	CSM2	0.770578	Subunit of the Shu complex (aka PCSS complex)
YPR161C	SGV1	0.767223	Cyclin (Bur2p)-dependent protein kinase
YBL087C	RPL23A	0.767223	Ribosomal 60S subunit protein L23A
YHR210C	YHR210C	0.767223	Putative aldose 1-epimerase superfamily protein
YOL101C	YOL101C	0.763867	Membrane protein involved in zinc ion homeostasis
YGR037C	ACB1	0.763867	Acyl-CoA-binding protein
YJR106W	ECM27	0.760511	Protein involved in calcium homeostasis and exit from quiescence
YNL055C	POR1	0.760511	Mitochondrial porin (voltage-dependent anion channel)
YGR184C	UBR1	0.760511	E3 ubiquitin ligase (N-recognin)
YLR154W-B	YLR154W-B	0.760511	Dubious open reading frame
YPL181W	CTI6	0.757156	Component of the Rpd3L histone deacetylase complex
YMR235C	RNA1	0.757156	GTPase activating protein (GAP) for Gsp1p
YCL052C	PBN1	0.757156	Component of glycosylphosphatidylinositol-mannosyltransferase I
YDL127W	PCL2	0.7538	Cyclin, interacts with cyclin-dependent kinase Pho85p
YDL223C	HBT1	0.7538	Shmoo tip protein, substrate of Hub1p ubiquitin-like protein
YPL213W	LEA1	0.750444	Component of U2 snRNP complex
YIL078W	THS1	0.750444	Threonyl-tRNA synthetase
YOR302W	YOR302W	0.750444	CPA1 uORF
YGL111W	NSA1	0.750444	Constituent of 66S pre-ribosomal particles
YLR183C	TOS4	0.750444	Putative transcription factor, contains Forkhead Associated domain
YMR182C	RGM1	0.747089	Putative zinc finger DNA binding transcription factor
YGR255C	COQ6	0.747089	Flavin-dependent monooxygenase involved in ubiquinone biosynthesis
YGR111W	YGR111W	0.747089	Putative protein of unknown function
YDR392W	SPT3	0.743733	Subunit of the SAGA and SAGA-like transcriptional regulatory complexes
YBR008C	FLR1	0.743733	Plasma membrane transporter of the major facilitator superfamily
YHR178W	STB5	0.743733	Transcription factor
YDR464W	SPP41	0.740377	Protein of unknown function
YDL245C	HXT15	0.740377	Putative transmembrane polyol transporter
YGL096W	TOS8	0.740377	Homeodomain-containing protein and putative transcription factor
YOR298C-A	MBF1	0.737022	Transcriptional coactivator
YML058W	SML1	0.737022	Ribonucleotide reductase inhibitor
YDR139C	RUB1	0.737022	Ubiquitin-like protein with similarity to mammalian NEDD8
YHL016C	DUR3	0.737022	Plasma membrane transporter for both urea and polyamines
YOL158C	ENB1	0.737022	Ferric enterobactin transmembrane transporter
YHR201C	PPX1	0.737022	Exopolyphosphatase
YCL056C	YCL056C	0.737022	Protein that regulates peroxisome populations
YBR258C	SHG1	0.733666	Subunit of the COMPASS (Set1C) complex
YPR016C	TIF6	0.733666	Constituent of 66S pre-ribosomal particles
YOR380W	RDR1	0.733666	Transcriptional repressor involved in regulating multidrug resistance
YBR175W	SWD3	0.73031	Essential subunit of the COMPASS (Set1C) complex
YER090W	TRP2	0.723599	Anthranilate synthase
YOL088C	MPD2	0.723599	Member of the protein disulfide isomerase (PDI) family
YNL257C	SIP3	0.720243	Putative sterol transfer protein
YDR081C	PDC2	0.716888	Transcription factor for thiamine-regulated genes
YER026C	CHO1	0.716888	Phosphatidylserine synthase
YBR048W	RPS11B	0.713532	Protein component of the small (40S) ribosomal subunit
YPR198W	SGE1	0.713532	Plasma membrane multidrug transporter
YPL120W	VPS30	0.713532	Subunit of phosphatidylinositol (PtdIns) 3-kinase complexes I and II
YLR417W	VPS36	0.713532	Component of the ESCRT-II complex
YPL103C	FMP30	0.713532	Protein with a role in maintaining mitochondrial morphology
YCL030C	HIS4	0.710176	Multifunctional enzyme containing phosphoribosyl-ATP pyrophosphatase
YPR049C	ATG11	0.710176	Adapter protein for pexophagy and the Cvt targeting pathway
YKL167C	MRP49	0.710176	Mitochondrial ribosomal protein of the large subunit
YHR184W	SSP1	0.710176	Protein involved in the control of meiotic nuclear division
YIL103W	YIL103W	0.710176	Protein required for synthesis of diphthamide
YOR177C	MPC54	0.706821	Component of the meiotic outer plaque
YFR019W	FAB1	0.703465	1-phosphatidylinositol-3-phosphate 5-kinase
YLR228C	ECM22	0.703465	Sterol regulatory element binding protein
YPL241C	CIN2	0.700109	GTPase-activating protein (GAP) for Cin4p
YJL099W	CHS6	0.700109	Member of the ChAPs (Chs5p-Arf1p-binding proteins) family
YBR182C-A	YBR182C-A	0.700109	Putative protein of unknown function
YOR027W	STI1	0.700109	Evolutionarily-conserved Hsp90 cochaperone
YMR220W	ERG8	0.696754	Phosphomevalonate kinase
YLR353W	BUD8	0.693398	Protein involved in bud-site selection
YER039C-A	YER039C-A	0.693398	Putative protein of unknown function
YBR274W	CHK1	0.690042	Serine/threonine kinase and DNA damage checkpoint effector
YDR108W	GSG1	0.690042	Component of transport protein particle (TRAPP) complex III
YER117W	RPL23B	0.690042	Ribosomal 60S subunit protein L23B
YJR014W	YJR014W	0.690042	Protein of unknown function
YER030W	YER030W	0.690042	Histone chaperone for Htz1p/H2A-H2B dimer
YGR150C	YGR150C	0.690042	Mitochondrial 15S rRNA-binding protein
YKR031C	SPO14	0.686687	Phospholipase D
YGR117C	YGR117C	0.686687	Putative protein of unknown function
YLR281C	YLR281C	0.686687	Mitochondrial protein of unknown function
YIL020C	HIS6	0.683331	Enzyme that catalyzes the fourth step in the histidine pathway
YFR029W	PTR3	0.683331	Component of the SPS plasma membrane amino acid sensor system
YKL119C	VPH2	0.679975	Integral membrane protein required for V-ATPase function
YGL154C	LYS5	0.679975	Phosphopantetheinyl transferase involved in lysine biosynthesis
YDR135C	YCF1	0.679975	Vacuolar glutathione S-conjugate transporter
YJL161W	FMP33	0.679975	Putative protein of unknown function
YKL207W	YKL207W	0.679975	Member of conserved ER transmembrane complex
YLR059C	REX2	0.67662	3'-5' RNA exonuclease
YGL212W	VAM7	0.67662	Vacuolar SNARE protein
YMR134W	YMR134W	0.673264	Protein of unknown function involved in ergosterol biosynthesis
YAL061W	YAL061W	0.673264	Putative medium-chain alcohol dehydrogenase with similarity to BDH1
YML125C	YML125C	0.673264	Putative cytochrome b5 reductase, localized to the plasma membrane
YNL192W	CHS1	0.669908	Chitin synthase I
YCR051W	YCR051W	0.669908	Putative protein of unknown function
YOR117W	RPT5	0.666553	ATPase of the 19S regulatory particle of the 26S proteasome
YJR150C	DAN1	0.666553	Cell wall mannoprotein
YOR353C	SOG2	0.666553	Key component of the RAM signaling network
YER137C	YER137C	0.666553	Putative protein of unknown function
YGR294W	YGR294W	0.666553	Protein of unknown function
YLR406C-A	YLR406C-A	0.666553	Putative protein of unknown function
YJR137C	ECM17	0.663197	Sulfite reductase beta subunit
YGL213C	SKI8	0.663197	Ski complex component and WD-repeat protein
YNL197C	WHI3	0.663197	RNA binding protein that sequesters CLN3 mRNA in cytoplasmic foci
YGL120C	PRP43	0.659841	RNA helicase in the DEAH-box family
YOR219C	STE13	0.659841	Dipeptidyl aminopeptidase
YHR151C	YHR151C	0.659841	Protein of unknown function
YJR060W	CBF1	0.656486	Basic helix-loop-helix (bHLH) protein
YHR113W	YHR113W	0.656486	Cytoplasmic aspartyl aminopeptidase with possible vacuole function
YJL110C	GZF3	0.65313	GATA zinc finger protein
YCL001W-B	YCL001W-B	0.65313	Putative protein of unknown function
YGR227W	DIE2	0.649774	Dolichyl-phosphoglucose-dependent alpha-1,2-glucosyltransferase
YER050C	RSM18	0.649774	Mitochondrial ribosomal protein of the small subunit
YKL195W	FMP15	0.649774	Import and assembly protein in mitochondrial intermembrane space
YNL138W	SRV2	0.646419	CAP (cyclase-associated protein)
YOR349W	CIN1	0.646419	Tubulin folding factor D involved in beta-tubulin (Tub2p) folding
YCR065W	HCM1	0.646419	Forkhead transcription factor
YCR003W	MRPL32	0.646419	Mitochondrial ribosomal protein of the large subunit
YOR381W	FRE3	0.646419	Ferric reductase
YIL009C-A	EST3	0.643063	Component of the telomerase holoenzyme
YLR357W	RSC2	0.643063	Component of the RSC chromatin remodeling complex
YJL036W	SNX4	0.639707	Sorting nexin
YCL011C	GBP2	0.639707	Poly(A+) RNA-binding protein
YML002W	YML002W	0.639707	Putative protein of unknown function
YKR054C	DYN1	0.636352	Cytoplasmic heavy chain dynein
YMR231W	PEP5	0.636352	Histone E3 ligase, component of CORVET membrane tethering complex
YIL135C	VHS2	0.632996	Regulator of septin dynamics
YLR438W	CAR2	0.632996	L-ornithine transaminase (OTAse)
YHR024C	MAS2	0.62964	Alpha subunit of the mitochondrial processing protease (MPP)
YNL287W	SEC21	0.62964	Gamma subunit of coatomer
YNL318C	HXT14	0.62964	Protein with similarity to hexose transporter family members
YDR161W	YDR161W	0.62964	Specific assembly chaperone for ribosomal protein Rpl4a/Rpl4b
YMR173W	DDR48	0.626285	DNA damage-responsive protein
YLR147C	SMD3	0.626285	Core Sm protein Sm D3
YHR214C-E	YHR214C-E	0.626285	Putative protein of unknown function
YJL201W	ECM25	0.622929	Non-essential protein of unknown function
YPL094C	SEC62	0.622929	Essential subunit of Sec63 complex
YKR003W	OSH6	0.619573	Oxysterol-binding phosphatidylserine transferase
YHR108W	GGA2	0.619573	Protein that regulates Arf1p, Arf2p to facilitate Golgi trafficking
YDR512C	EMI1	0.619573	Non-essential protein of unknown function
YBR254C	TRS20	0.619573	Core component of transport protein particle (TRAPP) complexes I-III
YKL073W	LHS1	0.616218	Molecular chaperone of the endoplasmic reticulum lumen
YGR209C	TRX2	0.616218	Cytoplasmic thioredoxin isoenzyme
YML080W	DUS1	0.616218	Dihydrouridine synthase
YGR247W	CPD1	0.616218	Cyclic nucleotide phosphodiesterase
YMR053C	STB2	0.616218	Protein that interacts with Sin3p in a two-hybrid assay
YIL067C	YIL067C	0.616218	Uncharacterized protein of unknown function
YLR153C	ACS2	0.612862	Acetyl-coA synthetase isoform
YDR287W	YDR287W	0.612862	Inositol monophosphatase
YCR018C	SRD1	0.612862	Protein involved in the processing of pre-rRNA to mature rRNA
YIL084C	SDS3	0.612862	Component of the Rpd3L histone deacetylase complex
YPL061W	ALD6	0.612862	Cytosolic aldehyde dehydrogenase
YJR116W	YJR116W	0.612862	Protein with distant similarity to ceramide synthase paralogs Lag1p an
YMR251W-A	HOR7	0.609506	Protein of unknown function
YNR003C	RPC34	0.609506	RNA polymerase III subunit C34
YKL040C	NFU1	0.609506	Protein involved in Fe-S cluster transfer to mitochondrial clients
YDR405W	MRP20	0.609506	Mitochondrial ribosomal protein of the large subunit
YJL221C	FSP2	0.609506	Alpha-glucosidase
YFR023W	PES4	0.609506	Poly(A) binding protein, suppressor of DNA polymerase epsilon mutation
YJR057W	CDC8	0.606151	Nucleoside monophosphate and nucleoside diphosphate kinase
YPR035W	GLN1	0.606151	Glutamine synthetase (GS)
YCR033W	SNT1	0.606151	Subunit of the Set3C deacetylase complex
YCR035C	RRP43	0.606151	Exosome non-catalytic core component
YLR145W	YLR145W	0.606151	Subunit of RNase MRP
YHL028W	WSC4	0.606151	Endoplasmic reticulum (ER) membrane protein
YBR158W	AMN1	0.602795	Modulator of cell separation and mitotic exit
YGR183C	QCR9	0.602795	Subunit 9 of ubiquinol cytochrome-c reductase (Complex III)
YDL055C	PSA1	0.602795	GDP-mannose pyrophosphorylase (mannose-1-phosphate guanyltransferase)
YKR004C	ECM9	0.602795	Non-essential protein of unknown function
YGL023C	PIB2	0.602795	PhosphatidylInositol(3)-phosphate binding protein
YJR082C	EAF6	0.602795	Subunit of the NuA4 acetyltransferase complex
YMR240C	CUS1	0.599439	Protein required for assembly of U2 snRNP into the spliceosome
YLR335W	NUP2	0.599439	Nucleoporin involved in nucleocytoplasmic transport
YER098W	UBP9	0.599439	Ubiquitin-specific protease that cleaves ubiquitin-protein fusions
YLR119W	SRN2	0.599439	Component of the ESCRT-I complex
YEL018W	EAF5	0.599439	Non-essential subunit of the NuA4 acetyltransferase complex
YPR112C	MRD1	0.592728	Essential conserved small ribosomal subunit (40s) synthesis factor
YMR200W	ROT1	0.592728	Molecular chaperone involved in protein folding in ER
YBR095C	RXT2	0.592728	Component of the histone deacetylase Rpd3L complex
YKL006W	RPL14A	0.592728	Ribosomal 60S subunit protein L14A
YER144C	UBP5	0.592728	Putative ubiquitin-specific protease
YER083C	RMD7	0.589372	Subunit of the GET complex
YHR001W	OSH7	0.589372	Oxysterol-binding phosphatidylserine transferase
YDL141W	BPL1	0.589372	Biotin:apoprotein ligase
YKR013W	PRY2	0.589372	Sterol binding protein involved in the export of acetylated sterols
YJR110W	YJR110W	0.586017	Phosphatidylinositol 3-phosphate (PI3P) phosphatase
YLR175W	CBF5	0.582661	Pseudouridine synthase catalytic subunit of box H/ACA snoRNPs
YNL283C	WSC2	0.582661	Sensor-transducer of the stress-activated PKC1-MPK1 signaling pathway
YPR163C	TIF3	0.582661	Translation initiation factor eIF-4B
YBR238C	YBR238C	0.582661	Mitochondrial membrane protein
YNL032W	SIW14	0.579305	Inositol phosphatase involved in inositol pyrophosphate metabolism
YLR133W	CKI1	0.579305	Choline kinase
YER151C	UBP3	0.579305	Ubiquitin-specific protease that cleaves Ub-protein fusions
YKR069W	MET1	0.579305	S-adenosyl-L-methionine uroporphyrinogen III transmethylase
YKR021W	YKR021W	0.579305	Alpha arrestin, substrate of calcineurin
YPR102C	RPL11A	0.57595	Ribosomal 60S subunit protein L11A
YKL125W	RRN3	0.57595	Protein required for transcription of rDNA by RNA polymerase I
YIL022W	TIM44	0.57595	Essential component of the TIM23 complex
YKR043C	YKR043C	0.569238	Sedoheptulose bisphosphatase involved in riboneogenesis
YAR018C	KIN3	0.565883	Nonessential serine/threonine protein kinase
YNL290W	RFC3	0.565883	Subunit of heteropentameric Replication factor C (RF-C)
YKL145W	RPT1	0.565883	ATPase of the 19S regulatory particle of the 26S proteasome
YLL043W	FPS1	0.565883	Aquaglyceroporin, plasma membrane channel
YIL069C	RPS24B	0.562527	Protein component of the small (40S) ribosomal subunit
YMR250W	GAD1	0.562527	Glutamate decarboxylase
YGR006W	PRP18	0.559171	Splicing factor and component of snRNP U5
YNL279W	PRM1	0.559171	Pheromone-regulated multispanning membrane protein
YPR124W	CTR1	0.555816	High-affinity copper transporter of plasma membrane
YIR001C	SGN1	0.55246	Cytoplasmic RNA-binding protein
YCL042W	YCL042W	0.55246	Putative protein of unknown function
YGR283C	YGR283C	0.55246	Putative methyltransferase
YKL050C	YKL050C	0.55246	Protein of unknown function
YIL042C	YIL042C	0.55246	Mitochondrial protein kinase
YLR312C	YLR312C	0.55246	Autophagy receptor with a role in degradation of the ER and nucleus
YKL110C	KTI12	0.549104	Protein that plays a role in modification of tRNA wobble nucleosides
YML046W	PRP39	0.545749	U1 snRNP protein involved in splicing
YER055C	HIS1	0.545749	ATP phosphoribosyltransferase
YOR075W	UFE1	0.545749	t-SNARE protein required for retrograde vesicular traffic
YDR346C	SVF1	0.545749	Protein with a potential role in cell survival pathways
YGR146C-A	YGR146C-A	0.542393	Putative protein of unknown function
YLR312C-B	YLR312C-B	0.542393	Merged open reading frame
YJL103C	YJL103C	0.539037	Putative zinc cluster protein of unknown function
YHR102W	KIC1	0.535682	Protein kinase of the PAK/Ste20 family, required for cell integrity
YNR067C	DSE4	0.535682	Daughter cell-specific secreted protein with similarity to glucanases
YPL179W	PPQ1	0.535682	Protein phosphatase that regulates the mating response
YGR224W	AZR1	0.535682	Plasma membrane transporter of the major facilitator superfamily
YDR305C	HNT2	0.535682	Dinucleoside triphosphate hydrolase
YGR015C	YGR015C	0.535682	Ethanol acetyltransferase
YLR040C	YLR040C	0.535682	MATalpha-specific a-factor blocker
YPL015C	HST2	0.532326	Cytoplasmic NAD(+)-dependent protein deacetylase
YPL116W	HOS3	0.532326	Trichostatin A-insensitive homodimeric histone deacetylase (HDAC)
YJL163C	YJL163C	0.532326	Putative protein of unknown function
YHR106W	TRR2	0.525615	Mitochondrial thioredoxin reductase
YHL020C	OPI1	0.525615	Transcriptional regulator of a variety of genes
YGL142C	GPI10	0.525615	Integral membrane protein involved in GPI anchor synthesis
YEL029C	BUD16	0.522259	Putative pyridoxal kinase
YAL039C	CYC3	0.522259	Cytochrome c heme lyase (holocytochrome c synthase)
YLR437C	YLR437C	0.522259	Protein that regulates nuclear localization of Rnr2p and Rnr4p
YOR265W	RBL2	0.518903	Protein involved in microtubule morphogenesis
YMR211W	DML1	0.518903	Essential protein involved in mtDNA inheritance
YOL005C	RPB11	0.518903	RNA polymerase II subunit B12.5
YLR087C	CSF1	0.518903	Protein required for fermentation at low temperature
YLL005C	SPO75	0.518903	Meiosis-specific protein of unknown function
YHR149C	YHR149C	0.518903	Integral membrane protein
YJL092W	HPR5	0.515548	DNA helicase and DNA-dependent ATPase
YDR039C	ENA2	0.515548	P-type ATPase sodium pump
YML013W	SEL1	0.515548	Bridging factor involved in ER-associated protein degradation (ERAD)
YJL212C	OPT1	0.515548	Proton-coupled oligopeptide transporter of the plasma membrane
YJR115W	YJR115W	0.515548	Putative protein of unknown function
YDR213W	UPC2	0.512192	Sterol regulatory element binding protein
YCR026C	YCR026C	0.512192	Nucleotide pyrophosphatase/phosphodiesterase
YPL151C	PRP46	0.508836	Member of the NineTeen Complex (NTC)
YJL153C	INO1	0.508836	Inositol-3-phosphate synthase
YER046W	SPO73	0.508836	Meiosis-specific protein required for prospore membrane morphogenesis
YDR261C	EXG2	0.505481	Exo-1,3-beta-glucanase
YLR410W	VIP1	0.505481	Bifunctional inositol pyrophosphate kinase and phosphatase
YMR115W	FMP24	0.505481	Subunit of the mitochondrial (mt) i-AAA protease supercomplex
YLR318W	EST2	0.502125	Reverse transcriptase subunit of the telomerase holoenzyme
YDR070C	FMP16	0.502125	Protein of unknown function
YDR404C	RPB7	0.502125	RNA polymerase II subunit B16
YDR218C	SPR28	0.502125	Sporulation-specific homolog of the CDC3/10/11/12 family of genes
YPR037C	ERV2	0.502125	Flavin-linked sulfhydryl oxidase localized to the ER lumen
YGR097W	ASK10	0.498769	Regulator of the Fps1p glycerol channel
YEL017W	GTT3	0.498769	Protein of unknown function may be involved in glutathione metabolism
YAL019W	FUN30	0.498769	Snf2p family member with ATP-dependent chromatin remodeling activity
YER182W	FMP10	0.498769	Putative protein of unknown function
YLR404W	YLR404W	0.498769	Seipin involved in lipid droplet (LD) assembly
YPR078C	YPR078C	0.495414	Putative protein of unknown function
YGL099W	LSG1	0.495414	Putative GTPase involved in 60S ribosomal subunit biogenesis
YOR001W	RRP6	0.495414	Nuclear exosome exonuclease component
YLR199C	YLR199C	0.495414	Protein involved in 20S proteasome assembly
YNL307C	MCK1	0.492058	Dual-specificity ser/thr and tyrosine protein kinase
YAL060W	BDH1	0.492058	NAD-dependent (R,R)-butanediol dehydrogenase
YDL120W	YFH1	0.492058	Mitochondrial matrix iron chaperone
YDL156W	YDL156W	0.492058	Nuclear protein with role in transcription, protein quality control
YCR061W	YCR061W	0.492058	Protein of unknown function
YJL149W	YJL149W	0.492058	Putative SCF ubiquitin ligase F-box protein
YBL018C	POP8	0.488702	Subunit of both RNase MRP and nuclear RNase P
YAL051W	OAF1	0.488702	Oleate-activated transcription factor
YIL071C	PCI8	0.488702	Possible shared subunit of Cop9 signalosome (CSN) and eIF3
YDR527W	RBA50	0.488702	Protein involved in transcription
YIR018C-A	YIR018C-A	0.488702	Putative protein of unknown function
YOR340C	RPA43	0.485347	RNA polymerase I subunit A43
YDR265W	PEX10	0.485347	Peroxisomal membrane E3 ubiquitin ligase
YGR249W	MGA1	0.485347	Protein similar to heat shock transcription factor
YFR036W	CDC26	0.481991	Subunit of the Anaphase-Promoting Complex/Cyclosome (APC/C)
YPL174C	NIP100	0.481991	Large subunit of the dynactin complex
YOR179C	SYC1	0.481991	Subunit of the APT subcomplex of cleavage and polyadenylation factor
YDR478W	SNM1	0.481991	Ribonuclease MRP complex subunit
YLR110C	CCW12	0.481991	Cell wall mannoprotein
YDL095W	PMT1	0.481991	Protein O-mannosyltransferase of the ER membrane
YBR097W	VPS15	0.481991	Serine/threonine protein kinase involved in vacuolar protein sorting
YER104W	RTT105	0.478635	Chaperone for Replication Protein A complex (RPA)
YGL163C	RAD54	0.478635	DNA-dependent ATPase that stimulates strand exchange
YMR218C	TRS130	0.478635	Component of transport protein particle (TRAPP) complex II
YOR280C	FSH3	0.478635	Putative serine hydrolase
YLR464W	YLR464W	0.478635	Putative protein of unknown function
YNL117W	MLS1	0.47528	Malate synthase, enzyme of the glyoxylate cycle
YAL067C	SEO1	0.47528	Putative permease
YOR255W	OSW1	0.47528	Protein involved in sporulation
YHR071W	PCL5	0.471924	Cyclin
YNL298W	CLA4	0.471924	Cdc42p-activated signal transducing kinase
YPR189W	SKI3	0.471924	Ski complex component and TPR protein
YJL061W	NUP82	0.471924	Linker nucleoporin component of the nuclear pore complex (NPC)
YGR103W	NOP7	0.471924	Component of several different pre-ribosomal particles
YHR118C	ORC6	0.468568	Subunit of the origin recognition complex (ORC)
YMR083W	ADH3	0.468568	Mitochondrial alcohol dehydrogenase isozyme III
YBL098W	BNA4	0.468568	Kynurenine 3-monooxygenase
YDL147W	RPN5	0.468568	Subunit of the CSN and 26S proteasome lid complexes
YPL057C	SUR1	0.465213	Mannosylinositol phosphorylceramide (MIPC) synthase catalytic subunit
YML112W	CTK3	0.465213	Gamma subunit of C-terminal domain kinase I
YJR147W	HMS2	0.465213	Protein with similarity to heat shock transcription factors
YJR133W	XPT1	0.465213	Xanthine-guanine phosphoribosyl transferase
YDR378C	LSM6	0.461857	Lsm (Like Sm) protein
YLR074C	BUD20	0.461857	C2H2-type zinc finger protein required for ribosome assembly
YFL018C	LPD1	0.458501	Dihydrolipoamide dehydrogenase
YBR294W	SUL1	0.458501	High affinity sulfate permease of the SulP anion transporter family
YDR414C	ERD1	0.458501	Predicted membrane protein required for lumenal ER protein retention
YHR084W	STE12	0.455146	Transcription factor that is activated by a MAPK signaling cascade
YIR026C	YVH1	0.455146	Dual specificity protein phosphatase
YOR337W	TEA1	0.455146	Ty1 enhancer activator involved in Ty enhancer-mediated transcription
YER122C	GLO3	0.455146	ADP-ribosylation factor GTPase activating protein (ARF GAP)
YKL034W	TUL1	0.455146	Subunit of the DSC ubiquitin ligase complex
YOR274W	MOD5	0.45179	Delta 2-isopentenyl pyrophosphate:tRNA isopentenyl transferase
YDR205W	MSC2	0.45179	Endoplasmic reticulum zinc transporter
YGR271C-A	YGR271C-A	0.45179	Ribosome biogenesis factor required for maturation of 18S rRNA
YDL218W	YDL218W	0.45179	Putative protein of unknown function
YIL056W	YIL056W	0.45179	Transcriptional activator
YFL026W	STE2	0.448434	Receptor for alpha-factor pheromone
YDR167W	TAF10	0.448434	Subunit (145 kDa) of TFIID and SAGA complexes
YGR002C	GOD1	0.448434	Component of the Swr1p complex that incorporates Htz1p into chromatin
YOR294W	RRS1	0.448434	Essential protein that binds ribosomal protein L11
YBR013C	YBR013C	0.448434	Putative protein of unknown function
YPR187W	RPO26	0.445079	RNA polymerase subunit ABC23
YDR190C	RVB1	0.445079	ATP-dependent DNA helicase, also known as pontin
YBR131W	CCZ1	0.445079	Subunit of a heterodimeric guanine nucleotide exchange factor (GEF)
YKR035W-A	DID2	0.445079	Class E protein of the vacuolar protein-sorting (Vps) pathway
YDR065W	YDR065W	0.445079	Protein of unknown function
YDL105W	QRI2	0.445079	Component of the SMC5-SMC6 complex
YER092W	IES5	0.445079	Non-essential INO80 chromatin remodeling complex subunit
YIL064W	YIL064W	0.445079	Lysine methyltransferase
YDR217C	RAD9	0.441723	DNA damage-dependent checkpoint protein
YJL002C	OST1	0.441723	Alpha subunit of the oligosaccharyltransferase complex of the ER lumen
YBR145W	ADH5	0.441723	Alcohol dehydrogenase isoenzyme V
YOR125C	CAT5	0.438367	Protein required for ubiquinone (Coenzyme Q) biosynthesis
YDL216C	RRI1	0.438367	Catalytic subunit of the COP9 signalosome (CSN) complex
YMR162C	DNF3	0.438367	Trans-golgi network aminophospholipid translocase (flippase)
YJR011C	YJR011C	0.438367	Putative protein of unknown function
YKL205W	LOS1	0.435012	Nuclear pore protein
YHR150W	PEX28	0.435012	Peroxisomal integral membrane peroxin
YML015C	TAF11	0.431656	TFIID subunit (40 kDa)
YCL031C	RRP7	0.431656	Essential protein involved in rRNA processing and ribosome biogenesis
YDR077W	SED1	0.431656	Major stress-induced structural GPI-cell wall glycoprotein
YOR016C	ERP4	0.4283	Member of the p24 family involved in ER to Golgi transport
YLR201C	FMP53	0.4283	Protein required for ubiquinone biosynthesis and respiratory growth
YLR258W	GSY2	0.424945	Glycogen synthase
YLR019W	PSR2	0.424945	Putative plasma membrane phosphatase
YOR099W	KTR1	0.424945	Alpha-1,2-mannosyltransferase
YIL088C	AVT7	0.424945	Vacuolar amino acid transporter
YLR011W	LOT6	0.424945	FMN-dependent NAD(P)H:quinone reductase
YDR267C	YDR267C	0.424945	Component of cytosolic iron-sulfur protein assembly (CIA) machinery
YLR412W	YLR412W	0.424945	Protein involved in microtubule-related processes
YIL046W-A	YIL046W-A	0.424945	Putative protein of unknown function
YJR140C	HIR3	0.421589	Subunit of the HIR complex
YLR137W	YLR137W	0.421589	Protein lysine methyltransferase
YGR044C	RME1	0.418233	Zinc finger protein involved in control of meiosis
YNR036C	YNR036C	0.418233	Mitochondrial protein
YOR307C	SLY41	0.418233	Protein involved in ER-to-Golgi transport
YER039C	HVG1	0.418233	Protein of unknown function
YLR099C	ICT1	0.418233	Lysophosphatidic acid acyltransferase
YBR193C	MED8	0.414878	Subunit of the RNA polymerase II mediator complex
YNL016W	PUB1	0.411522	Poly (A)+ RNA-binding protein
YGR004W	PEX31	0.411522	Peroxisomal integral membrane protein
YER017C	AFG3	0.411522	Mitochondrial inner membrane m-AAA protease component
YJL193W	YJL193W	0.411522	Putative protein of unknown function
YGL234W	ADE5,7	0.408166	Enzyme of the 'de novo' purine nucleotide biosynthetic pathway
YGL211W	YGL211W	0.408166	Protein required for uridine thiolation of Gln, Lys, and Glu tRNAs
YIL014C-A	YIL014C-A	0.408166	Putative protein of unknown function
YPL029W	SUV3	0.404811	ATP-dependent RNA helicase
YOL155C	YOL155C	0.404811	Haze-protective mannoprotein
YBR103W	SIF2	0.404811	WD40 repeat-containing subunit of Set3C histone deacetylase complex
YGR220C	MRPL9	0.404811	Mitochondrial ribosomal protein of the large subunit
YCL021W-A	YCL021W-A	0.404811	Putative protein of unknown function
YMR027W	YMR027W	0.404811	A metal-dependent phosphatase, part of the DUF89 protein family
YLR168C	YLR168C	0.404811	Mitochondrial intermembrane space protein
YDR419W	RAD30	0.401455	DNA polymerase eta
YDL130W-A	STF1	0.401455	Protein involved in regulation of the mitochondrial F1F0-ATP synthase
YOR106W	VAM3	0.401455	Syntaxin-like vacuolar t-SNARE
YIL060W	YIL060W	0.401455	Mitochondrial protein of unknown function
YBR023C	CHS3	0.398099	Chitin synthase III
YER115C	SPR6	0.398099	Protein of unknown function
YBR062C	YBR062C	0.398099	Protein of unknown function that interacts with Msb2p
YOR119C	RIO1	0.394744	Serine kinase involved in cell cycle regulation and rDNA integrity
YKL141W	SDH3	0.394744	Subunit of succinate dehydrogenase and of TIM22 translocase
YHL011C	PRS3	0.394744	5-phospho-ribosyl-1(alpha)-pyrophosphate synthetase
YHR082C	KSP1	0.394744	Serine/threonine protein kinase
YNL090W	RHO2	0.391388	Non-essential small GTPase of the Rho/Rac family of Ras-like proteins
YBL069W	AST1	0.391388	Lipid raft associated protein
YBR255C-A	YBR255C-A	0.391388	Mitochondrial inner membrane protein
YHR133C	NSG1	0.391388	Protein involved in regulation of sterol biosynthesis
YDR086C	SSS1	0.388033	Subunit of the Sec61p translocation complex (Sec61p-Sss1p-Sbh1p)
YDR420W	HKR1	0.388033	Mucin family member that functions as an osmosensor in the HOG pathway
YDR329C	PEX3	0.388033	Peroxisomal membrane protein (PMP)
YER005W	YND1	0.388033	Apyrase with wide substrate specificity
YCR021C	HSP30	0.384677	Negative regulator of the H(+)-ATPase Pma1p
YPR156C	TPO3	0.384677	Polyamine transporter of the major facilitator superfamily
YDL057W	YDL057W	0.384677	Putative protein of unknown function
YPR110C	RPC40	0.381321	RNA polymerase subunit AC40
YFR046C	CNN1	0.381321	Kinetochore protein
YLR239C	LIP2	0.381321	Lipoyl ligase
YGL148W	ARO2	0.381321	Bifunctional chorismate synthase and flavin reductase
YAL022C	FUN26	0.381321	High affinity, broad selectivity, nucleoside/nucleobase transporter
YMR018W	YMR018W	0.381321	Peroxisomal membrane signal receptor for peroxisomal matrix proteins
YKL074C	MUD2	0.377966	Protein involved in early pre-mRNA splicing
YKR055W	RHO4	0.377966	Non-essential small GTPase
YBR065C	ECM2	0.377966	Pre-mRNA splicing factor
YCR015C	YCR015C	0.377966	Protein required for cold tolerance
YKL071W	YKL071W	0.377966	NADH-dependent aldehyde reductase
YJL129C	TRK1	0.37461	Component of the Trk1p-Trk2p potassium transport system
YBR265W	TSC10	0.37461	3-ketosphinganine reductase
YPL186C	UIP4	0.37461	Protein that interacts with Ulp1p
YAR020C	PAU7	0.37461	Member of the seripauperin multigene family
YBR147W	YBR147W	0.37461	Putative vacuolar membrane transporter for cationic amino acids
YGL146C	YGL146C	0.37461	Putative protein of unknown function
YJR124C	YJR124C	0.37461	Putative protein of unknown function
YIL147C	SLN1	0.371254	Transmembrane histidine phosphotransfer kinase and osmosensor
YBR130C	SHE3	0.371254	Protein adaptor between Myo4p and the She2p-mRNA complex
YLL001W	DNM1	0.371254	Dynamin-related GTPase involved in mitochondrial organization
YBR270C	YBR270C	0.371254	Subunit of TORC2 membrane-associated complex
YMR164C	MSS11	0.367899	Transcription factor
YEL069C	HXT13	0.367899	Putative transmembrane polyol transporter
YKR007W	MEH1	0.367899	Subunit of the EGO/GSE complex
YIR007W	YIR007W	0.367899	Steryl-beta-glucosidase with broad specificity for aglycones
YPL112C	PEX25	0.364543	Peripheral peroxisomal membrane peroxin
YMR113W	FOL3	0.364543	Dihydrofolate synthetase, involved in folic acid biosynthesis
YBR171W	SEC66	0.364543	Non-essential subunit of Sec63 complex
YHL021C	FMP12	0.364543	Protein of unknown function
YMR066W	SOV1	0.364543	Mitochondrial protein of unknown function
YKR011C	YKR011C	0.364543	Protein of unknown function
YML094W	GIM5	0.361187	Subunit of the heterohexameric cochaperone prefoldin complex
YDR373W	FRQ1	0.361187	N-myristoylated calcium-binding protein
YDR156W	RPA14	0.361187	RNA polymerase I subunit A14
YOR181W	LAS17	0.361187	Actin assembly factor
YKL130C	SHE2	0.361187	RNA-binding protein that binds specific mRNAs and interacts with She3p
YDR371W	CTS2	0.361187	Putative chitinase
YPL089C	RLM1	0.357832	MADS-box transcription factor
YOR036W	PEP12	0.357832	Target membrane receptor (t-SNARE)
YBL024W	NCL1	0.357832	S-adenosyl-L-methionine-dependent tRNA: m5C-methyltransferase
YDR466W	PKH3	0.357832	Protein kinase with similarity to mammalian PDK1 and yeast Pkh1p/Phk2p
YAL029C	MYO4	0.357832	Type V myosin motor involved in actin-based transport of cargos
YMR313C	TGL3	0.357832	Bifunctional triacylglycerol lipase and LPE acyltransferase
YHR009C	YHR009C	0.357832	Putative oxidoreductase involved in late endosome to Golgi transport
YLR368W	MDM30	0.354476	F-box component of an SCF ubiquitin protein ligase complex
YKL003C	MRP17	0.354476	Mitochondrial ribosomal protein of the small subunit
YKL155C	RSM22	0.354476	Mitochondrial ribosomal protein of the small subunit
YIL093C	RSM25	0.354476	Mitochondrial ribosomal protein of the small subunit
YIL098C	FMC1	0.354476	Mitochondrial matrix protein
YML042W	CAT2	0.354476	Carnitine acetyl-CoA transferase
YOR189W	IES4	0.354476	Component of the INO80 chromatiin remodeling complex
YLL032C	YLL032C	0.354476	Protein of unknown function
YOL091W	SPO21	0.35112	Component of the meiotic outer plaque of the spindle pole body
YIL038C	NOT3	0.35112	Component of the CCR4-NOT core complex, involved in mRNA decapping
YML068W	ITT1	0.35112	Protein that modulates the efficiency of translation termination
YLR077W	FMP25	0.35112	Protein required for assembly of respiratory complex III
YKL068W-A	YKL068W-A	0.35112	Putative protein of unknown function
YLR412C-A	YLR412C-A	0.35112	Putative protein of unknown function
YCR039C	MATALPHA2	0.347765	Homeobox-domain protein
YIL037C	PRM2	0.347765	Pheromone-regulated protein
YDR075W	PPH3	0.347765	Catalytic subunit of protein phosphatase PP4 complex
YDR508C	GNP1	0.347765	Broad specificity amino acid permease
YOL025W	LAG2	0.347765	Protein that negatively regulates the SCF E3-ubiquitin ligase
YDL110C	YDL110C	0.347765	Regulatory gamma subunit of fatty acid synthase (FAS)
YCR045C	YCR045C	0.347765	Probable subtilisin-family protease
YKL194C	MST1	0.344409	Mitochondrial threonyl-tRNA synthetase
YJL060W	BNA3	0.344409	Kynurenine aminotransferase
YLR254C	YLR254C	0.344409	Homolog of nuclear distribution factor NudE
YGR113W	DAM1	0.341053	Essential subunit of the Dam1 complex (aka DASH complex)
YDL051W	LHP1	0.341053	RNA binding protein required for maturation of tRNA and U6 snRNA
YOR048C	RAT1	0.341053	Nuclear 5' to 3' single-stranded RNA exonuclease
YCL026C-A	FRM2	0.341053	Type II nitroreductase, using NADH as reductant
YOL110W	SHR5	0.341053	Palmitoyltransferase subunit
YBR022W	YBR022W	0.341053	Phosphatase that is highly specific for ADP-ribose 1''-phosphate
YPR070W	MED1	0.337698	Subunit of the RNA polymerase II mediator complex
YKL197C	PEX1	0.337698	AAA-peroxin
YPR103W	PRE2	0.337698	Beta 5 subunit of the 20S proteasome
YHR199C-A	YHR199C-A	0.337698	Subunit of the conserved chromosomal passenger complex (CPC)
YHR152W	SPO12	0.334342	Nucleolar protein of unknown function
YLR329W	REC102	0.334342	Protein involved in early stages of meiotic recombination
YDR236C	FMN1	0.334342	Riboflavin kinase, produces riboflavin monophosphate (FMN)
YOR023C	AHC1	0.334342	Subunit of the Ada histone acetyltransferase complex
YGL225W	VRG4	0.334342	Golgi GDP-mannose transporter
YHR025W	THR1	0.334342	Homoserine kinase
YBL036C	YBL036C	0.334342	Putative non-specific single-domain racemase
YPR009W	SUT2	0.334342	Zn2Cys6 family transcription factor
YDR238C	SEC26	0.334342	Essential beta-coat protein of the COPI coatomer
YDR475C	JIP4	0.334342	Protein of unknown function
YDR022C	CIS1	0.330986	Autophagy-specific protein required for autophagosome formation
YBR142W	MAK5	0.330986	Essential nucleolar protein
YOR116C	RPO31	0.330986	RNA polymerase III largest subunit C160
YBR213W	MET8	0.330986	Bifunctional dehydrogenase and ferrochelatase
YPL028W	ERG10	0.330986	Acetyl-CoA C-acetyltransferase (acetoacetyl-CoA thiolase)
YCL010C	SGF29	0.330986	Component of the HAT/Core module of the SAGA, SLIK, and ADA complexes
YNL270C	ALP1	0.330986	Arginine transporter
YHR218W	YHR218W	0.330986	Helicase-like protein encoded within the telomeric Y' element
YLL010C	PSR1	0.327631	Plasma membrane-associated protein phosphatase
YOL147C	PEX11	0.327631	Peroxisomal protein required for medium-chain fatty acid oxidation
YCR023C	YCR023C	0.327631	Vacuolar membrane protein of unknown function
YLR108C	YLR108C	0.327631	Protein of unknown function
YIL144W	TID3	0.324275	Component of the kinetochore-associated Ndc80 complex
YDR505C	PSP1	0.324275	Asn and gln rich protein of unknown function
YIR025W	MND2	0.320919	Subunit of the Anaphase-Promoting Complex/Cyclosome (APC/C)
YHR043C	DOG2	0.320919	2-deoxyglucose-6-phosphate phosphatase
YMR219W	ESC1	0.320919	Protein involved in telomeric silencing
YJL158C	CIS3	0.320919	Mannose-containing glycoprotein constituent of the cell wall
YER166W	DNF1	0.320919	Aminophospholipid translocase (flippase)
YLR204W	QRI5	0.320919	Mitochondrial inner membrane protein
YBL046W	YBL046W	0.320919	Regulatory subunit of protein phosphatase PP4
YKL084W	YKL084W	0.320919	Zinc-binding mitochondrial intermembrane space (IMS) protein
YOL067C	RTG1	0.317564	Transcription factor (bHLH) involved in interorganelle communication
YBR123C	TFC1	0.317564	Subunit of RNA polymerase III transcription initiation factor complex
YML049C	RSE1	0.317564	Protein involved in pre-mRNA splicing
YOR168W	GLN4	0.317564	Glutamine tRNA synthetase
YPL026C	SKS1	0.317564	Putative serine/threonine protein kinase
YBR222C	PCS60	0.317564	Oxalyl-CoA synthetase
YDR105C	TMS1	0.317564	Vacuolar membrane protein of unknown function
YLR219W	MSC3	0.314208	Protein of unknown function
YGL084C	GUP1	0.314208	Plasma membrane protein involved in remodeling GPI anchors
YDR177W	UBC1	0.310852	Ubiquitin-conjugating enzyme
YJL043W	YJL043W	0.310852	Putative protein of unknown function
YLL008W	DRS1	0.307497	Nucleolar DEAD-box protein required for ribosome assembly and function
YDL061C	RPS29B	0.307497	Protein component of the small (40S) ribosomal subunit
YOR145C	PNO1	0.307497	Essential nucleolar protein required for pre-18S rRNA processing
YLR188W	MDL1	0.307497	Mitochondrial inner membrane half-type ABC transporter
YAL008W	FUN14	0.307497	Integral mitochondrial outer membrane (MOM) protein
YJL185C	YJL185C	0.307497	Pex3p interacting protein, required for pexophagy
YHR081W	LRP1	0.304141	Nuclear exosome-associated nucleic acid binding protein
YMR150C	IMP1	0.304141	Catalytic subunit of mitochondrial inner membrane peptidase complex
YLR126C	YLR126C	0.304141	Putative glutamine amidotransferase
YIR042C	YIR042C	0.304141	Putative protein of unknown function
YJL207C	YJL207C	0.304141	AP-1 accessory protein
YER065C	ICL1	0.300785	Isocitrate lyase
YJL133W	MRS3	0.300785	Iron transporter, mediates Fe2+ transport across inner mito membrane
YNL310C	FMP28	0.300785	Protein co-chaperone with a zinc finger motif
YGR161C	RTS3	0.29743	Putative component of the protein phosphatase type 2A complex
YDR363W	ESC2	0.294074	Sumo-like domain protein
YNL207W	RIO2	0.294074	Essential serine kinase involved in the processing of 20S pre-rRNA
YNL015W	PBI2	0.294074	Cytosolic inhibitor of vacuolar proteinase B (PRB1)
YLR139C	SLS1	0.294074	Mitochondrial membrane protein
YNL182C	IPI3	0.294074	Component of the Rix1 complex and pre-replicative complexes (pre-RCs)
YJR016C	ILV3	0.294074	Dihydroxyacid dehydratase
YNL044W	YIP3	0.294074	Protein localized to COPII vesicles
YLR017W	MEU1	0.290718	Methylthioadenosine phosphorylase (MTAP)
YLR083C	EMP70	0.290718	Protein with a role in cellular adhesion and filamentous growth
YOR301W	RAX1	0.287363	Protein involved in establishing bud site selection
YMR226C	YMR226C	0.287363	NADP(+)-dependent serine dehydrogenase and carbonyl reductase
YCR019W	MAK32	0.287363	Protein necessary for stability of L-A dsRNA-containing particles
YAR003W	SWD1	0.284007	Subunit of the COMPASS (Set1C) complex
YLR247C	YLR247C	0.284007	E3 ubiquitin ligase and putative helicase
YER056C-A	RPL34A	0.280651	Ribosomal 60S subunit protein L34A
YMR140W	SIP5	0.280651	Protein of unknown function
YDR166C	SEC5	0.280651	Essential 107kDa subunit of the exocyst complex
YNL238W	KEX2	0.280651	Kexin, a subtilisin-like protease (proprotein convertase)
YMR153W	NUP53	0.280651	FG-nucleoporin component of central core of nuclear pore complex (NPC)
YDR300C	PRO1	0.280651	Gamma-glutamyl kinase
YIR004W	DJP1	0.280651	ER-associated chaperone involved in protein targeting
YFR026C	YFR026C	0.280651	Protein of unknown function
YER167W	BCK2	0.277296	Serine/threonine-rich protein involved in PKC1 signaling pathway
YBR170C	NPL4	0.277296	Substrate-recruiting cofactor of the Cdc48p-Npl4p-Ufd1p segregase
YNL154C	YCK2	0.277296	Palmitoylated plasma membrane-bound casein kinase I (CK1) isoform
YDR074W	TPS2	0.277296	Phosphatase subunit of the trehalose-6-P synthase/phosphatase complex
YDR446W	ECM11	0.277296	Meiosis-specific protein
YHR116W	YHR116W	0.277296	Protein that functions in mitochondrial copper homeostasis
YOL004W	SIN3	0.277296	Component of both the Rpd3S and Rpd3L histone deacetylase complexes
YPL271W	ATP15	0.277296	Epsilon subunit of the F1 sector of mitochondrial F1F0 ATP synthase
YER093C	TSC11	0.277296	Subunit of TORC2 (Tor2p-Lst8p-Avo1-Avo2-Tsc11p-Bit61p)
YDR427W	RPN9	0.277296	Non-ATPase regulatory subunit of the 26S proteasome
YKL190W	CNB1	0.27394	Calcineurin B
YNL292W	PUS4	0.27394	Pseudouridine synthase
YFL002C	SPB4	0.27394	Putative ATP-dependent RNA helicase
YOR215C	YOR215C	0.270584	Protein of unknown function
YJR006W	HYS2	0.270584	Subunit of DNA polymerase delta (polymerase III)
YPL253C	VIK1	0.270584	Protein that forms a kinesin-14 heterodimeric motor with Kar3p
YNL282W	POP3	0.270584	Subunit of both RNase MRP and nuclear RNase P
YLR426W	YLR426W	0.270584	Putative protein of unknown function
YML032C	RAD52	0.267229	Protein involved in homologous recombination
YPL177C	CUP9	0.267229	Homeodomain-containing transcriptional repressor
YGR171C	MSM1	0.267229	Mitochondrial methionyl-tRNA synthetase (MetRS)
YFL034C-A	RPL22B	0.267229	Ribosomal 60S subunit protein L22A
YPL254W	HFI1	0.267229	Adaptor protein required for structural integrity of the SAGA complex
YPL096W	PNG1	0.267229	Conserved peptide N-glycanase
YDR060W	MAK21	0.267229	Constituent of 66S pre-ribosomal particles
YBR052C	YBR052C	0.267229	Protein of unknown function
YIL152W	YIL152W	0.267229	Putative protein of unknown function
YGR240C-A	YGR240C-A	0.267229	Putative protein of unknown function
YLR263W	RED1	0.263873	Protein component of the synaptonemal complex axial elements
YGL136C	MRM2	0.263873	Mitochondrial 2' O-ribose methyltransferase
YMR158W	MRPS8	0.263873	Mitochondrial ribosomal protein of the small subunit
YDR492W	YDR492W	0.263873	Membrane protein involved in zinc ion homeostasis
YKL217W	JEN1	0.263873	Monocarboxylate/proton symporter of the plasma membrane
YMR076C	PDS5	0.260517	Cohesion maintenance factor
YIL145C	PAN6	0.260517	Pantothenate synthase
YLR084C	RAX2	0.260517	Protein required for the maintenance of bud site selection
YBL002W	HTB2	0.260517	Histone H2B
YGR271W	SLH1	0.260517	Subunit of ribosome-associated quality control trigger complex (RQT)
YLR036C	YLR036C	0.260517	Putative protein predicted to have transmembrane domains
YNR033W	ABZ1	0.257162	Para-aminobenzoate (PABA) synthase
YBR102C	EXO84	0.257162	Exocyst subunit with dual roles in exocytosis and spliceosome assembly
YMR069W	NAT4	0.257162	N alpha-acetyl-transferase
YML131W	YML131W	0.257162	Protein of unknown function
YPR129W	SCD6	0.253806	Repressor of translation initiation
YLR212C	TUB4	0.25045	Gamma-tubulin
YGR135W	PRE9	0.25045	Alpha 3 subunit of the 20S proteasome
YDR046C	BAP3	0.25045	Amino acid permease
YKL078W	DHR2	0.25045	Predominantly nucleolar DEAH-box ATP-dependent RNA helicase
YDR033W	MRH1	0.25045	Protein that localizes primarily to the plasma membrane
YDR496C	PUF6	0.25045	Pumilio-homology domain protein
YGR032W	GSC2	0.247095	Catalytic subunit of 1,3-beta-glucan synthase
YDR273W	DON1	0.247095	Meiosis-specific component of the spindle pole body
YOL077W-A	ATP19	0.247095	Subunit k of the mitochondrial F1F0 ATP synthase
YPR083W	MDM36	0.247095	Mitochondrial protein
YHL035C	VMR1	0.247095	Vacuolar membrane protein
YMR071C	TVP18	0.247095	Integral membrane protein
YML108W	YML108W	0.247095	Protein of unknown function
YOL123W	HRP1	0.243739	Subunit of cleavage factor I
YGR056W	RSC1	0.243739	Component of the RSC chromatin remodeling complex
YDR030C	RAD28	0.243739	Protein involved in DNA repair
YNR034W	SOL1	0.243739	Protein with a possible role in tRNA export
YNL329C	PEX6	0.243739	AAA-peroxin
YJL132W	YJL132W	0.243739	Putative protein of unknown function
YMR225C	MRPL44	0.240383	Mitochondrial ribosomal protein of the large subunit
YDR073W	SNF11	0.240383	Subunit of the SWI/SNF chromatin remodeling complex
YLR467W	YRF1-5	0.240383	Helicase encoded by the Y' element of subtelomeric regions
YIL016W	SNL1	0.240383	Ribosome-associated protein
YEL064C	AVT2	0.240383	Putative transporter
YJR031C	GEA1	0.240383	Guanine nucleotide exchange factor for ADP ribosylation factors (ARFs)
YDL116W	NUP84	0.237028	Subunit of the Nup84p subcomplex of the nuclear pore complex (NPC)
YBL032W	HEK2	0.237028	RNA binding protein involved in asymmetric localization of ASH1 mRNA
YER105C	NUP157	0.237028	Subunit of the inner ring of the nuclear pore complex (NPC)
YDR158W	HOM2	0.237028	Aspartic beta semi-aldehyde dehydrogenase
YJR142W	YJR142W	0.237028	8-oxo-dGTP diphosphatase of the Nudix hydrolase family
YBR019C	GAL10	0.233672	UDP-glucose-4-epimerase
YGL113W	SLD3	0.233672	Protein involved in the initiation of DNA replication
YPL157W	TGS1	0.233672	Trimethyl guanosine synthase, conserved nucleolar methyl transferase
YLR447C	VMA6	0.233672	Subunit d of the V0 integral membrane domain of V-ATPase
YOR242C	SSP2	0.233672	Sporulation specific protein that localizes to the spore wall
YLR092W	SUL2	0.233672	High affinity sulfate permease
YGL169W	SUA5	0.233672	Protein involved in threonylcarbamoyl adenosine biosynthesis
YGL232W	TAN1	0.230316	Putative tRNA acetyltransferase
YDR283C	GCN2	0.230316	Protein kinase
YEL042W	GDA1	0.230316	Guanosine diphosphatase located in the Golgi
YLR392C	YLR392C	0.230316	Protein of unknown function that contains 2 PY motifs
YGL171W	ROK1	0.226961	RNA-dependent ATPase
YOR368W	RAD17	0.223605	Checkpoint protein
YBR182C	SMP1	0.223605	MADS-box transcription factor involved in osmotic stress response
YDL166C	FAP7	0.223605	Essential NTPase required for small ribosome subunit synthesis
YIR021W	MRS1	0.223605	Splicing protein
YML043C	RRN11	0.223605	Component of the core factor (CF) rDNA transcription factor complex
YFL053W	DAK2	0.223605	Dihydroxyacetone kinase
YJR025C	BNA1	0.223605	3-hydroxyanthranilic acid dioxygenase
YLR056W	ERG3	0.223605	C-5 sterol desaturase
YDL185W	TFP1	0.223605	Subunit A of the V1 peripheral membrane domain of V-ATPase
YLR461W	PAU4	0.223605	Member of the seripauperin multigene family
YDR408C	ADE8	0.223605	Phosphoribosyl-glycinamide transformylase
YGL080W	FMP37	0.223605	Highly conserved subunit of mitochondrial pyruvate carrier (MPC)
YML018C	YML018C	0.223605	Protein of unknown function
YNL164C	IBD2	0.220249	Component of the BUB2-dependent spindle checkpoint pathway
YEL061C	CIN8	0.220249	Bipolar kinesin motor protein
YJR120W	YJR120W	0.220249	Protein of unknown function
YHR047C	AAP1'	0.220249	Arginine/alanine amino peptidase
YHR021C	RPS27B	0.220249	Protein component of the small (40S) ribosomal subunit
YDL049C	KNH1	0.216894	Protein with similarity to Kre9p
YGR156W	PTI1	0.216894	Essential component of CPF (cleavage and polyadenylation factor)
YGL055W	OLE1	0.216894	Delta(9) fatty acid desaturase
YDR277C	MTH1	0.213538	Negative regulator of the glucose-sensing signal transduction pathway
YML123C	PHO84	0.213538	High-affinity inorganic phosphate (Pi) transporter
YER171W	RAD3	0.213538	5' to 3' DNA helicase
YHL006C	SHU1	0.213538	Component of Shu complex (aka PCSS complex)
YHR007C-A	YHR007C-A	0.213538	Putative protein of unknown function
YLR422W	YLR422W	0.213538	Dock family protein (Dedicator Of CytoKinesis), homolog of human DOCK1
YIL177C	YIL177C	0.213538	Putative Y' element ATP-dependent helicase
YDL215C	GDH2	0.210182	NAD(+)-dependent glutamate dehydrogenase
YGL049C	TIF4632	0.210182	Translation initiation factor eIF4G and scaffold protein
YIL047C	SYG1	0.206827	Plasma membrane protein of unknown function
YER062C	HOR2	0.206827	DL-glycerol-3-phosphate phosphatase involved in glycerol biosynthesis
YPL070W	MUK1	0.206827	Guanine nucleotide exchange factor (GEF)
YBR082C	UBC4	0.206827	Ubiquitin-conjugating enzyme (E2)
YJR143C	PMT4	0.206827	Protein O-mannosyltransferase
YHR050W-A	YHR050W-A	0.206827	Protein of unknown function
YFL025C	BST1	0.203471	GPI inositol deacylase of the endoplasmic reticulum (ER)
YCR046C	IMG1	0.203471	Mitochondrial ribosomal protein of the large subunit
YNL302C	RPS19B	0.203471	Protein component of the small (40S) ribosomal subunit
YPL232W	SSO1	0.203471	Plasma membrane t-SNARE
YGR230W	BNS1	0.200115	Protein of unknown function
YGR296W	YRF1-3	0.200115	Helicase encoded by the Y' element of subtelomeric regions
YCR031C	RPS14A	0.200115	Protein component of the small (40S) ribosomal subunit
YBL042C	FUI1	0.200115	High affinity uridine permease, localizes to the plasma membrane
YLR004C	YLR004C	0.200115	Putative plasma membrane permease
YCR060W	TAH1	0.200115	Component of conserved R2TP complex (Rvb1-Rvb2-Tah1-Pih1)
YEL035C	UTR5	0.200115	Protein of unknown function
YHR054C	YHR054C	0.200115	Putative protein of unknown function
YKR036C	CAF4	0.19676	WD40 repeat-containing protein associated with the CCR4-NOT complex
YHR051W	COX6	0.19676	Subunit VI of cytochrome c oxidase (Complex IV)
YLL006W	MMM1	0.19676	ER integral membrane protein, ERMES complex subunit
YDR409W	SIZ1	0.19676	SUMO E3 ligase
YIR019C	MUC1	0.19676	GPI-anchored cell surface glycoprotein (flocculin)
YBL061C	SKT5	0.193404	Activator of Chs3p (chitin synthase III) during vegetative growth
YHR146W	CRP1	0.193404	Protein that binds to cruciform DNA structures
YKL106W	AAT1	0.193404	Mitochondrial aspartate aminotransferase
YER068W	MOT2	0.193404	Ubiquitin-protein ligase subunit of the CCR4-NOT complex
YBL082C	RHK1	0.193404	Dolichol-P-Man dependent alpha(1-3) mannosyltransferase
YER150W	SPI1	0.193404	GPI-anchored cell wall protein involved in weak acid resistance
YLR241W	YLR241W	0.193404	Calcium permeable gated cation channel
YKR072C	SIS2	0.190048	Negative regulatory subunit of protein phosphatase 1 (Ppz1p)
YIL119C	RPI1	0.190048	Transcription factor, allelic differences between S288C and Sigma1278b
YMR198W	CIK1	0.190048	Kinesin-associated protein
YNL166C	BNI5	0.190048	Linker protein responsible for recruitment of myosin to the bud neck
YDR469W	SDC1	0.190048	Subunit of the COMPASS (Set1C) complex
YLL015W	BPT1	0.190048	ABC type transmembrane transporter of MRP/CFTR family
YKL014C	URB1	0.190048	Protein required for the normal accumulation of 25S and 5.8S rRNAs
YER086W	ILV1	0.190048	Threonine deaminase, catalyzes first step in isoleucine biosynthesis
YER041W	YEN1	0.190048	Holliday junction resolvase
YJR024C	YJR024C	0.190048	5'-methylthioribulose-1-phosphate dehydratase
YJR035W	RAD26	0.186693	Protein involved in transcription-coupled nucleotide excision repair
YIL094C	LYS12	0.186693	Homo-isocitrate dehydrogenase
YBR267W	YBR267W	0.183337	Cytoplasmic pre-60S factor
YKL005C	BYE1	0.183337	Negative regulator of transcription elongation
YHR170W	NMD3	0.183337	Protein involved in nuclear export of the large ribosomal subunit
YGL066W	SGF73	0.183337	Subunit of DUBm module of SAGA and SLIK
YBR285W	YBR285W	0.183337	Putative protein of unknown function
YPL155C	KIP2	0.179981	Kinesin-related motor protein involved in mitotic spindle positioning
YBR278W	DPB3	0.179981	Third-largest subunit of DNA polymerase II (DNA polymerase epsilon)
YLR354C	TAL1	0.179981	Transaldolase, enzyme in the non-oxidative pentose phosphate pathway
YML115C	VAN1	0.179981	Component of the mannan polymerase I
YLR142W	PUT1	0.179981	Proline oxidase
YDR014W	RAD61	0.179981	Subunit of a complex that inhibits sister chromatid cohesion
YOR391C	HSP33	0.179981	Possible chaperone and cysteine protease
YBR111W-A	SUS1	0.176626	Component of both the SAGA histone acetylase and TREX-2 complexes
YKR010C	TOF2	0.176626	Protein required for rDNA silencing and mitotic rDNA condensation
YDR376W	ARH1	0.176626	Oxidoreductase of the mitochondrial inner membrane
YGR077C	PEX8	0.176626	Intraperoxisomal organizer of the peroxisomal import machinery
YPR033C	HTS1	0.176626	Cytoplasmic and mitochondrial histidine tRNA synthetase
YPR073C	LTP1	0.176626	Protein phosphotyrosine phosphatase of unknown cellular role
YHR207C	SET5	0.176626	Methyltransferase involved in methylation of histone H4 Lys5, -8, -12
YKL101W	HSL1	0.17327	Nim1p-related protein kinase
YDL077C	VAM6	0.17327	Guanine nucleotide exchange factor for the GTPase Gtr1p
YBR047W	FMP23	0.17327	Putative protein of unknown function
YPL113C	YPL113C	0.17327	Glyoxylate reductase
YOL081W	IRA2	0.169914	GTPase-activating protein
YGL014W	PUF4	0.169914	Member of the PUF protein family
YER029C	SMB1	0.169914	Core Sm protein Sm B
YPL104W	MSD1	0.169914	Mitochondrial aspartyl-tRNA synthetase
YKR070W	YKR070W	0.169914	Putative protein of unknown function
YLR107W	REX3	0.166559	RNA exonuclease
YOL065C	INP54	0.166559	Phosphatidylinositol 4,5-bisphosphate 5-phosphatase
YAR050W	FLO1	0.166559	Lectin-like protein involved in flocculation
YJL171C	YJL171C	0.166559	GPI-anchored cell wall protein of unknown function
YER088C	DOT6	0.163203	Protein involved in rRNA and ribosome biogenesis
YPL190C	NAB3	0.163203	RNA-binding protein, subunit of Nrd1 complex (Nrd1p-Nab3p-Sen1p)
YLR337C	VRP1	0.163203	Verprolin, proline-rich actin-associated protein
YNL136W	EAF7	0.159847	Subunit of the NuA4 histone acetyltransferase complex
YFL061W	YFL061W	0.159847	Cyanamide hydratase that detoxifies cyanamide
YPL194W	DDC1	0.156492	DNA damage checkpoint protein
YLL039C	UBI4	0.156492	Ubiquitin
YOR357C	GRD19	0.156492	Sorting nexin for late-Golgi enzymes
YCL005W	YCL005W	0.156492	Protein involved in lipid droplet (LD) assembly
YHR126C	YHR126C	0.153136	Putative GPI protein
YJR107W	YJR107W	0.153136	Putative lipase
YBL074C	AAR2	0.14978	Component of the U5 snRNP complex
YGR202C	PCT1	0.14978	Cholinephosphate cytidylyltransferase
YLR439W	MRPL4	0.14978	Mitochondrial ribosomal protein of the large subunit
YGR199W	PMT6	0.14978	Protein O-mannosyltransferase
YDR542W	YDR542W	0.14978	Protein of unknown function
YJL016W	YJL016W	0.14978	Putative protein of unknown function
YNL153C	GIM3	0.146425	Subunit of the heterohexameric cochaperone prefoldin complex
YNL118C	DCP2	0.146425	Catalytic subunit of Dcp1p-Dcp2p decapping enzyme complex
YOR354C	MSC6	0.146425	Multicopy suppressor of HER2 involved in mitochondrial translation
YBL102W	SFT2	0.146425	Tetra-spanning membrane protein found mostly in the late Golgi
YNL096C	RPS7B	0.143069	Protein component of the small (40S) ribosomal subunit
YPR068C	HOS1	0.143069	Class I histone deacetylase (HDAC) family member
YER157W	COG3	0.143069	Essential component of the conserved oligomeric Golgi complex
YJL084C	YJL084C	0.143069	Alpha arrestin, Ub-ligase adaptor for Rsp5p
YHL007C	STE20	0.139713	Cdc42p-activated signal transducing kinase
YNL314W	DAL82	0.139713	Positive regulator of allophanate inducible genes
YNL135C	FPR1	0.139713	Peptidyl-prolyl cis-trans isomerase (PPIase)
YPR056W	TFB4	0.139713	Subunit of TFIIH complex
YMR305C	SCW10	0.139713	Cell wall protein with similarity to glucanases
YMR192W	APP2	0.139713	Putative GTPase activating protein (GAP) with a role in exocytosis
YGL022W	STT3	0.139713	Catalytic subunit of the oligosaccharyltransferase complex of the ER l
YDR182W-A	YDR182W-A	0.139713	Putative protein of unknown function
YJR100C	YJR100C	0.139713	Mitochondria protein of unknown function
YJL046W	YJL046W	0.139713	Putative lipoate-protein ligase
YOR249C	APC5	0.136358	Subunit of the Anaphase-Promoting Complex/Cyclosome (APC/C)
YEL063C	CAN1	0.136358	Plasma membrane arginine permease
YNL328C	MDJ2	0.136358	Constituent of the mitochondrial import motor
YEL003W	GIM4	0.133002	Subunit of the heterohexameric cochaperone prefoldin complex
YBL023C	MCM2	0.133002	Protein involved in DNA replication
YPR184W	GDB1	0.133002	Glycogen debranching enzyme
YAL010C	MDM10	0.133002	Subunit of both the ERMES and the SAM complex
YNL066W	SUN4	0.133002	Cell wall protein related to glucanases localized in birth scars
YKL021C	MAK11	0.133002	Protein involved in an early step of 60S ribosomal subunit biogenesis
YLR146C	SPE4	0.129646	Spermine synthase
YDR313C	PIB1	0.129646	RING-type ubiquitin ligase of the endosomal and vacuolar membranes
YHR088W	RPF1	0.129646	Protein involved in assembly and export of the large ribosomal subunit
YHR195W	NVJ1	0.129646	Nuclear envelope protein
YDR307W	YDR307W	0.129646	Putative protein mannosyltransferase similar to Pmt1p
YJR097W	JJJ3	0.129646	Protein of unknown function
YJL077W-B	YJL077W-B	0.129646	Putative protein of unknown function
YHR167W	THP2	0.126291	Subunit of the THO and TREX complexes
YLR097C	HRT3	0.126291	Putative SCF-ubiquitin ligase F-box protein
YJR080C	FMP26	0.126291	Protein with a role in determining mitochondrial architecture
YBR225W	YBR225W	0.126291	Putative protein of unknown function
YHR164C	DNA2	0.122935	Tripartite DNA replication factor
YDR056C	YDR056C	0.122935	Putative protein of unknown function
YOR087W	YVC1	0.119579	Vacuolar cation channel
YGL194C	HOS2	0.119579	Histone deacetylase and subunit of Set3 and Rpd3L complexes
YHR175W	CTR2	0.119579	Low-affinity copper transporter of the vacuolar membrane
YML121W	GTR1	0.119579	Subunit of a TORC1-stimulating GTPase and the EGO/GSE complex
YIL151C	YIL151C	0.119579	hEST1A/B (SMG5/6)-like protein
YLL054C	YLL054C	0.119579	Putative protein of unknown function with similarity to Pip2p
YJR112W-A	YJR112W-A	0.119579	Putative protein of unknown function
YLR460C	YLR460C	0.119579	Member of the quinone oxidoreductase family
YHR202W	YHR202W	0.119579	Putative protein of unknown function
YEL015W	EDC3	0.116224	Non-essential conserved protein with a role in mRNA decapping
YDR320C-A	DAD4	0.116224	Essential subunit of the Dam1 complex (aka DASH complex)
YIL063C	YRB2	0.116224	Protein of unknown function
YPR011C	YPR011C	0.116224	Mitochondrial transporter
YDR407C	TRS120	0.116224	Component of transport protein particle (TRAPP) complex II
YGL071W	RCS1	0.112868	Transcription factor involved in iron utilization and homeostasis
YHR089C	GAR1	0.112868	Protein component of the H/ACA snoRNP pseudouridylase complex
YNL256W	FOL1	0.112868	Multifunctional enzyme of the folic acid biosynthesis pathway
YHR003C	YHR003C	0.112868	tRNA threonylcarbamoyladenosine dehydratase
YLR042C	YLR042C	0.112868	Cell wall protein of unknown function
YOR070C	GYP1	0.109512	Cis-golgi GTPase-activating protein (GAP) for yeast Rabs
YMR011W	HXT2	0.109512	High-affinity glucose transporter of the major facilitator superfamily
YBR135W	CKS1	0.106157	Cyclin-dependent protein kinase regulatory subunit and adaptor
YPL101W	ELP4	0.106157	Subunit of hexameric RecA-like ATPase Elp456 Elongator subcomplex
YJR160C	MPH3	0.106157	Alpha-glucoside permease
YJR061W	YJR061W	0.106157	Protein required for N-glycan mannosylphosphorylation
YKL062W	MSN4	0.102801	Stress-responsive transcriptional activator
YPL082C	MOT1	0.102801	Essential protein involved in regulation of transcription
YER161C	SPT2	0.102801	Protein involved in negative regulation of transcription
YNR023W	SNF12	0.102801	73 kDa subunit of the SWI/SNF chromatin remodeling complex
YJR118C	ILM1	0.102801	Protein of unknown function
YJL139C	YUR1	0.0994454	Mannosyltransferase involved in protein N-glycosylation
YLR272C	YCS4	0.0994454	Subunit of the condensin complex
YDR178W	SDH4	0.0994454	Membrane anchor subunit of succinate dehydrogenase (SDH)
YPL192C	PRM3	0.0994454	Protein required for nuclear envelope fusion during karyogamy
YMR104C	YPK2	0.0994454	Protein kinase similar to S/T protein kinase Ypk1p
YBR180W	DTR1	0.0994454	Putative dityrosine transporter of the major facilitator superfamily
YHR176W	FMO	0.0994454	Flavin-containing monooxygenase
YHR100C	YHR100C	0.0994454	Mitochondrial phosphatidylglycerophosphatase (PGP phosphatase)
YDR395W	SXM1	0.0960897	Nuclear transport factor (karyopherin)
YML113W	DAT1	0.0960897	DNA binding protein that recognizes oligo(dA).oligo(dT) tracts
YPR072W	NOT5	0.0960897	Component of the CCR4-NOT core complex, involved in mRNA decapping
YOR005C	DNL4	0.0960897	DNA ligase required for nonhomologous end-joining (NHEJ)
YJR049C	UTR1	0.0960897	ATP-NADH kinase
YPL115C	BEM3	0.0960897	Rho GTPase activating protein (RhoGAP)
YLL052C	AQY2	0.0960897	Water channel that mediates water transport across cell membranes
YGR260W	TNA1	0.0960897	High affinity nicotinic acid plasma membrane permease
YLR376C	PSY3	0.0960897	Component of Shu complex (aka PCSS complex)
YGR198W	YGR198W	0.0927341	Cargo-transport protein involved in endocytosis
YLR132C	YLR132C	0.0927341	Putative poly(U)-specific 3'-to-5' RNA exonuclease
YPL006W	NCR1	0.0927341	Vacuolar membrane protein involved with Npc2p in sterol trafficking
YHR119W	SET1	0.0927341	Histone methyltransferase, subunit of the COMPASS (Set1C) complex
YDL045W-A	MRP10	0.0927341	Mitochondrial ribosomal protein of the small subunit
YDR019C	GCV1	0.0927341	T subunit of the mitochondrial glycine decarboxylase complex
YPL063W	TIM50	0.0927341	Essential component of the TIM23 complex
YKL179C	COY1	0.0927341	Golgi membrane protein with similarity to mammalian CASP
YKR065C	FMP18	0.0927341	Constituent of the TIM23 complex
YMR293C	YMR293C	0.0893784	Subunit of the trimeric GatFAB AmidoTransferase(AdT) complex
YDR528W	HLR1	0.0893784	Protein involved in regulation of cell wall composition and integrity
YJL035C	TAD2	0.0893784	Subunit of tRNA-specific adenosine-34 deaminase
YKR029C	SET3	0.0893784	Defining member of the SET3 histone deacetylase complex
YIL116W	HIS5	0.0893784	Histidinol-phosphate aminotransferase
YOL140W	ARG8	0.0893784	Acetylornithine aminotransferase
YLR193C	YLR193C	0.0893784	Phosphatidic acid transfer protein
YNR031C	SSK2	0.0860227	MAP kinase kinase kinase of HOG1 mitogen-activated signaling pathway
YLR134W	PDC5	0.0860227	Minor isoform of pyruvate decarboxylase
YLR015W	BRE2	0.0860227	Subunit of COMPASS (Set1C) complex
YNL045W	YNL045W	0.0860227	Leucyl aminopeptidase yscIV with epoxide hydrolase activity
YER014W	HEM14	0.0860227	Protoporphyrinogen oxidase
YGR231C	PHB2	0.0860227	Subunit of the prohibitin complex (Phb1p-Phb2p)
YBR199W	KTR4	0.0860227	Glycosyltransferase involved in protein glycosylation
YHL036W	MUP3	0.0860227	Low affinity methionine permease
YMR048W	CSM3	0.0826671	Replication fork associated factor
YHR204W	MNL1	0.0826671	Alpha-1,2-specific exomannosidase of the endoplasmic reticulum
YJL039C	NUP192	0.0826671	Essential subunit of inner ring of nuclear pore complex (NPC)
YKL176C	LST4	0.0826671	Subunit of the Lst4p-Lst7p GTPase activating protein complex for Gtr2p
YDR067C	YDR067C	0.0826671	Cytoplasmic protein required for replication of Brome mosaic virus
YHR219W	YHR219W	0.0826671	Putative protein of unknown function with similarity to helicases
YDL236W	PHO13	0.0793114	Conserved phosphatase acting as a metabolite repair enzyme
YGR008C	STF2	0.0793114	Protein involved in resistance to desiccation stress
YJR127C	ZMS1	0.0793114	Zinc-finger protein
YBL019W	APN2	0.0793114	Class II abasic (AP) endonuclease involved in repair of DNA damage
YMR165C	SMP2	0.0793114	Mg2+-dependent phosphatidate (PA) phosphatase
YMR015C	ERG5	0.0793114	C-22 sterol desaturase
YDR503C	LPP1	0.0793114	Lipid phosphate phosphatase
YLR095C	IOC2	0.0793114	Subunit of the Isw1b complex
YLR431C	ATG23	0.0793114	Peripheral membrane protein required for autophagy and CVT
YBL017C	PEP1	0.0793114	Type I transmembrane sorting receptor for multiple vacuolar hydrolases
YDL056W	MBP1	0.0759557	Transcription factor
YLR102C	APC9	0.0759557	Subunit of the Anaphase-Promoting Complex/Cyclosome (APC/C)
YDL212W	SHR3	0.0759557	Endoplasmic reticulum packaging chaperone
YJL148W	RPA34	0.0759557	RNA polymerase I subunit A34.5
YGR256W	GND2	0.0759557	6-phosphogluconate dehydrogenase (decarboxylating)
YER129W	PAK1	0.0759557	Upstream serine/threonine kinase for the SNF1 complex
YDR202C	RAV2	0.0759557	Subunit of RAVE complex (Rav1p, Rav2p, Skp1p)
YDL104C	QRI7	0.0759557	Protein involved in threonylcarbamoyl adenosine biosynthesis
YOR054C	VHS3	0.0726001	Negative regulatory subunit of protein phosphatase 1 Ppz1p
YHR090C	YNG2	0.0726001	Subunit of NuA4, an essential histone acetyltransferase complex
YDR384C	ATO3	0.0726001	Plasma membrane protein, putative ammonium transporter
YML007C-A	YML007C-A	0.0726001	Mitochondrial protein of unknown function
YJL093C	TOK1	0.0692444	Outward-rectifier potassium channel of the plasma membrane
YDR296W	MHR1	0.0692444	Mitochondrial ribosomal protein of the large subunit
YPR138C	MEP3	0.0692444	Ammonium permease of high capacity and low affinity
YBR069C	TAT1	0.0692444	Amino acid transporter for valine, leucine, isoleucine, and tyrosine
YBR281C	YBR281C	0.0692444	Component of glutamine amidotransferase (GATase II)
YJR070C	LIA1	0.0658887	Deoxyhypusine hydroxylase
YDL098C	SNU23	0.0658887	Component of the U4/U6.U5 snRNP complex
YBL030C	PET9	0.0658887	Major ADP/ATP carrier of the mitochondrial inner membrane
YBR105C	VID24	0.0658887	GID Complex regulatory subunit
YGL027C	CWH41	0.0625331	Processing alpha glucosidase I
YNL232W	CSL4	0.0625331	Exosome non-catalytic core component
YDR480W	DIG2	0.0625331	MAP kinase-responsive inhibitor of the Ste12p transcription factor
YJL154C	VPS35	0.0625331	Endosomal subunit of membrane-associated retromer complex
YDR325W	YCG1	0.0591774	Subunit of the condensin complex
YPR175W	DPB2	0.0591774	Second largest subunit of DNA polymerase II (DNA polymerase epsilon)
YDR297W	SUR2	0.0591774	Sphinganine C4-hydroxylase
YOR143C	THI80	0.0591774	Thiamine pyrophosphokinase
YOL027C	MDM38	0.0591774	Membrane-associated mitochondrial ribosome receptor
YPL050C	MNN9	0.0591774	Subunit of Golgi mannosyltransferase complex
YDL040C	NAT1	0.0591774	Subunit of protein N-terminal acetyltransferase NatA
YAR064W	YAR064W	0.0591774	Pseudogenic fragment with similarity to flocculins
YBR229C	ROT2	0.0558218	Glucosidase II catalytic subunit
YML124C	TUB3	0.0558218	Alpha-tubulin
YDR259C	YAP6	0.0558218	Basic leucine zipper (bZIP) transcription factor
YHR006W	STP2	0.0558218	Transcription factor
YOR136W	IDH2	0.0558218	Subunit of mitochondrial NAD(+)-dependent isocitrate dehydrogenase
YML066C	SMA2	0.0558218	Meiosis-specific prospore membrane protein
YAL026C	DRS2	0.0558218	Trans-golgi network aminophospholipid translocase (flippase)
YCR040W	MATALPHA1	0.0524661	Transcriptional co-activator that regulates mating-type-specific genes
YLR226W	BUR2	0.0524661	Cyclin for the Sgv1p (Bur1p) protein kinase
YGR147C	NAT2	0.0524661	Protein of unknown function
YKR027W	FMP50	0.0524661	Member of the ChAPs (Chs5p-Arf1p-binding proteins) family
YDR055W	PST1	0.0524661	Cell wall protein that contains a putative GPI-attachment site
YER111C	SWI4	0.0491104	DNA binding component of the SBF complex (Swi4p-Swi6p)
YKL178C	STE3	0.0491104	Receptor for a factor pheromone
YLR342W	FKS1	0.0491104	Catalytic subunit of 1,3-beta-D-glucan synthase
YNL097C	PHO23	0.0491104	Component of the Rpd3L histone deacetylase complex
YOR304W	ISW2	0.0491104	ATP-dependent DNA translocase involved in chromatin remodeling
YGL051W	MST27	0.0491104	Putative integral membrane protein, involved in vesicle formation
YGL236C	MTO1	0.0491104	Mitochondrial protein
YOR046C	DBP5	0.0491104	Cytoplasmic ATP-dependent RNA helicase of the DEAD-box family
YML101C	CUE4	0.0491104	Protein of unknown function
YBR246W	YBR246W	0.0491104	Methylesterase performing penultimate step of diphthamide biosynthesis
YBR271W	YBR271W	0.0491104	S-adenosylmethionine-dependent methyltransferase
YDL144C	YDL144C	0.0491104	Protein of unknown function
YLR456W	YLR456W	0.0491104	Protein of unknown function
YGL240W	DOC1	0.0457548	Processivity factor
YMR287C	MSU1	0.0457548	3'-5' exoribonuclease
YBR117C	TKL2	0.0457548	Transketolase
YBR025C	YBR025C	0.0457548	P-loop ATPase with similarity to human OLA1 and bacterial YchF
YAL040C	CLN3	0.0423991	G1 cyclin involved in cell cycle progression
YOR101W	RAS1	0.0423991	GTPase involved in G-protein signaling in adenylate cyclase activation
YHR031C	RRM3	0.0423991	DNA helicase involved in rDNA replication and Ty1 transposition
YER169W	RPH1	0.0423991	JmjC domain-containing histone demethylase
YCL039W	GID7	0.0423991	Subunit of GID Complex that binds directly to central component Vid30p
YJL101C	GSH1	0.0423991	Gamma glutamylcysteine synthetase
YFR047C	BNA6	0.0423991	Quinolinate phosphoribosyl transferase
YJL160C	YJL160C	0.0423991	Putative protein of unknown function
YJL027C	YJL027C	0.0423991	Putative protein of unknown function
YPL269W	KAR9	0.0390434	Spindle positioning factor
YDR150W	NUM1	0.0390434	Protein required for nuclear migration
YER180C-A	SLO1	0.0390434	Protein interacting with Arl3p
YBR236C	ABD1	0.0390434	Methyltransferase
YLR242C	ARV1	0.0390434	Cortical ER protein
YJL197W	UBP12	0.0390434	Ubiquitin-specific protease
YLR054C	OSW2	0.0390434	Protein of unknown function reputedly involved in spore wall assembly
YIR035C	YIR035C	0.0390434	Putative cytoplasmic short-chain dehydrogenase/reductase
YKL112W	ABF1	0.0356878	DNA binding protein with possible chromatin-reorganizing activity
YIR018W	YAP5	0.0356878	Basic leucine zipper (bZIP) iron-sensing transcription factor
YHR114W	BZZ1	0.0356878	SH3 domain protein implicated in regulating actin polymerization
YIL129C	TAO3	0.0356878	Component of the RAM signaling network
YPL003W	ULA1	0.0356878	Protein that activates Rub1p (NEDD8) before neddylation
YPL024W	NCE4	0.0356878	Subunit of the RecQ (Sgs1p) - Topo III (Top3p) complex
YDR336W	YDR336W	0.0356878	Protein that associates with mitochondrial ribosome
YGR088W	CTT1	0.0323321	Cytosolic catalase T
YIL003W	CFD1	0.0323321	Highly conserved iron-sulfur cluster binding protein
YJL088W	ARG3	0.0323321	Ornithine carbamoyltransferase
YCL028W	RNQ1	0.0323321	[PIN(+)] prion
YAL063C-A	YAL063C-A	0.0323321	Putative protein of unknown function
YER124C	DSE1	0.0289764	Daughter cell-specific protein
YHR042W	NCP1	0.0289764	NADP-cytochrome P450 reductase
YLL061W	MMP1	0.0289764	High-affinity S-methylmethionine permease
YGL041C-B	YGL041C-B	0.0289764	Putative protein of unknown function
YJR129C	YJR129C	0.0289764	S-adenosylmethionine-dependent methyltransferase
YGR075C	PRP38	0.0256208	Unique component of the U4/U6.U5 tri-snRNP particle
YHL032C	GUT1	0.0256208	Glycerol kinase
YMR097C	MTG1	0.0256208	Putative GTPase peripheral to the mitochondrial inner membrane
YBR081C	SPT7	0.0256208	Subunit of the SAGA transcriptional regulatory complex
YIL158W	YIL158W	0.0256208	Protein of unknown function
YDR138W	HPR1	0.0222651	Subunit of THO/TREX complexes
YOL043C	NTG2	0.0222651	DNA N-glycosylase and apurinic/apyrimidinic (AP) lyase
YLR324W	PEX30	0.0222651	ER-resident protein involved in peroxisomal biogenesis
YLR291C	GCD7	0.0222651	Beta subunit of translation initiation factor eIF2B
YNR002C	FUN34	0.0222651	Putative transmembrane protein involved in export of ammonia
YDL070W	BDF2	0.0222651	Protein involved in transcription initiation
YNL071W	LAT1	0.0222651	Dihydrolipoamide acetyltransferase component (E2) of the PDC
YAR068W	YAR068W	0.0222651	Fungal-specific protein of unknown function
YJL123C	YJL123C	0.0222651	Protein of unknown function that may interact with ribosomes
YMR136W	GAT2	0.0189094	Protein containing GATA family zinc finger motifs
YDR002W	YRB1	0.0189094	Ran GTPase binding protein
YKR056W	TRM2	0.0189094	tRNA methyltransferase
YGL077C	HNM1	0.0189094	Plasma membrane transporter for choline, ethanolamine, and carnitine
YML072C	TCB3	0.0189094	Cortical ER protein involved in ER-plasma membrane tethering
YER032W	FIR1	0.0155538	Protein involved in 3' mRNA processing
YDR380W	ARO10	0.0155538	Phenylpyruvate decarboxylase
YOL077C	BRX1	0.0155538	Nucleolar protein
YNL274C	YNL274C	0.0155538	Glyoxylate reductase
YIL137C	YIL137C	0.0155538	Ribosome-associated, nascent chain binding factor
YJL164C	TPK1	0.0121981	cAMP-dependent protein kinase catalytic subunit
YCR020W-B	HTL1	0.0121981	Component of the RSC chromatin remodeling complex
YOR047C	STD1	0.0121981	Protein involved in control of glucose-regulated gene expression
YIR011C	STS1	0.0121981	Protein required for localizing proteasomes to the nucleus
YPL091W	GLR1	0.0121981	Cytosolic and mitochondrial glutathione oxidoreductase
YIR013C	GAT4	0.0121981	Protein containing GATA family zinc finger motifs
YLR055C	SPT8	0.0121981	Subunit of the SAGA transcriptional regulatory complex
YKR088C	TVP38	0.0121981	Integral membrane protein
YBL009W	YBL009W	0.00884246	Protein kinase
YLR451W	LEU3	0.00884246	Zinc-knuckle transcription factor, repressor and activator
YGR286C	BIO2	0.00884246	Biotin synthase
YIL115C	NUP159	0.00884246	FG-nucleoporin component of central core of the nuclear pore complex
YDR036C	EHD3	0.00884246	3-hydroxyisobutyryl-CoA hydrolase
YOR197W	MCA1	0.00884246	Ca2+-dependent cysteine protease
YGR237C	YGR237C	0.00884246	Putative protein of unknown function
YLL049W	YLL049W	0.00884246	Component of the dynactin complex
YJL013C	MAD3	0.00548679	Subunit of spindle-assembly checkpoint complex
YIL046W	MET30	0.00548679	F-box protein containing five copies of the WD40 motif
YLR007W	NSE1	0.00548679	Component of the SMC5-SMC6 complex
YGL200C	EMP24	0.00548679	Component of the p24 complex
YGL100W	SEH1	0.00548679	Subunit of the Nup84 nuclear pore and SEACAT subcomplexes
YPL210C	SRP72	0.00548679	Core component of the signal recognition particle (SRP)
YKR030W	GMH1	0.00548679	Golgi membrane protein of unknown function
YLR136C	TIS11	0.00548679	mRNA-binding protein expressed during iron starvation
YKL206C	YKL206C	0.00548679	Protein involved in 20S proteasome assembly
YDR477W	SNF1	0.00213113	AMP-activated S/T protein kinase
YMR277W	FCP1	0.00213113	Carboxy-terminal domain (CTD) phosphatase
YDR377W	ATP17	0.00213113	Subunit f of the F0 sector of mitochondrial F1F0 ATP synthase
YBR201W	DER1	0.00213113	ER membrane protein that promotes export of misfolded polypeptides
YPL027W	SMA1	0.00213113	Protein of unknown function involved in prospore membrane assembly
YOR127W	RGA1	0.00213113	GTPase-activating protein for polarity-regulator Cdc42p (RhoGAP)
YGR191W	HIP1	0.00213113	High-affinity histidine permease
YPL088W	YPL088W	0.00213113	Putative aryl alcohol dehydrogenase
YHR213W-A	YHR213W-A	0.00213113	Putative protein of unknown function
YLR425W	TUS1	-0.00122454	Guanine nucleotide exchange factor (GEF) that modulates Rho1p activity
YDR194C	MSS116	-0.00122454	Mitochondrial transcription elongation factor
YCR081W	SRB8	-0.00122454	Subunit of the RNA polymerase II mediator complex
YGL127C	SOH1	-0.00122454	Subunit of the RNA polymerase II mediator complex
YKR082W	NUP133	-0.00122454	Subunit of Nup84p subcomplex of nuclear pore complex (NPC)
YGR054W	YGR054W	-0.00122454	Eukaryotic initiation factor eIF2A
YDR456W	NHX1	-0.00122454	Na+/H+ and K+/H+ exchanger
YBR208C	DUR1,2	-0.00122454	Urea amidolyase
YDL179W	PCL9	-0.0045802	Cyclin
YFL036W	RPO41	-0.0045802	Mitochondrial RNA polymerase
YBR089C-A	NHP6B	-0.0045802	High-mobility group (HMG) protein
YML016C	PPZ1	-0.0045802	Serine/threonine protein phosphatase Z, isoform of Ppz2p
YOR258W	HNT3	-0.0045802	DNA 5' AMP hydrolase involved in DNA repair
YAL054C	ACS1	-0.00793586	Acetyl-coA synthetase isoform
YDR191W	HST4	-0.00793586	NAD(+)-dependent protein deacetylase
YHR038W	RRF1	-0.00793586	Mitochondrial ribosome recycling factor
YMR302C	PRP12	-0.00793586	Integral inner mitochondrial membrane protein
YNR047W	YNR047W	-0.00793586	Ser/Thr protein kinase
YIL035C	CKA1	-0.0112915	Alpha catalytic subunit of casein kinase 2 (CK2)
YJR046W	TAH11	-0.0112915	DNA replication licensing factor
YKL051W	SFK1	-0.0112915	Protein that regulates phospholipid asymmetry at plasma membrane
YFR003C	YPI1	-0.0112915	Regulatory subunit of the type I protein phosphatase (PP1) Glc7p
YCR059C	YIH1	-0.0112915	Negative regulator of eIF2 kinase Gcn2p
YOR241W	MET7	-0.0112915	Folylpolyglutamate synthetase
YBR250W	YBR250W	-0.0112915	Protein of unknown function
YCR024C-B	YCR024C-B	-0.0112915	Putative protein of unknown function
YLR094C	GIS3	-0.0146472	Protein of unknown function
YBR159W	YBR159W	-0.0146472	Microsomal beta-keto-reductase
YGR041W	BUD9	-0.0146472	Protein involved in bud-site selection
YKL053C-A	MDM35	-0.0146472	Mitochondrial intermembrane space protein
YBL080C	PET112	-0.0146472	Subunit of the trimeric GatFAB AmidoTransferase(AdT) complex
YER095W	RAD51	-0.0146472	Strand exchange protein
YNL185C	MRPL19	-0.0146472	Mitochondrial ribosomal protein of the large subunit
YNR056C	BIO5	-0.0146472	Putative transmembrane protein involved in the biotin biosynthesis
YGR185C	TYS1	-0.0146472	Cytoplasmic tyrosyl-tRNA synthetase
YDR372C	VPS74	-0.0146472	Golgi PI4K effector, PtdIns4P sensor, and retention receptor
YCL044C	YCL044C	-0.0146472	Subunit of the mitochondrial (mt) i-AAA protease supercomplex
YNL084C	END3	-0.0180029	EH domain-containing protein involved in endocytosis
YLL066C	YLL066C	-0.0180029	Putative Y' element ATP-dependent helicase
YJL096W	MRPL49	-0.0213585	Mitochondrial ribosomal protein of the large subunit
YBL089W	AVT5	-0.0213585	Putative transporter
YDR533C	HSP31	-0.0213585	Methylglyoxalase that converts methylglyoxal to D-lactate
YDR352W	YDR352W	-0.0213585	Putative vacuolar membrane transporter for cationic amino acids
YIL039W	YIL039W	-0.0213585	GPI-glycan remodelase
YJL178C	ATG27	-0.0247142	Type I membrane protein involved in autophagy and the Cvt pathway
YJL062W	LAS21	-0.0247142	Mannose-ethanolamine phosphotransferase
YNL167C	SKO1	-0.0247142	Basic leucine zipper transcription factor of the ATF/CREB family
YHL031C	GOS1	-0.0247142	v-SNARE protein involved in Golgi transport
YPL002C	SNF8	-0.0247142	Component of the ESCRT-II complex
YLR446W	YLR446W	-0.0247142	Putative hexokinase
YBR098W	MMS4	-0.0280698	Subunit of structure-specific Mms4p-Mus81p endonuclease
YER079W	YER079W	-0.0280698	Putative protein of unknown function
YBR179C	FZO1	-0.0280698	Mitofusin, protein involved in mitochondrial outer membrane fusion
YJR015W	YJR015W	-0.0280698	Putative protein of unknown function
YDR394W	RPT3	-0.0314255	ATPase of the 19S regulatory particle of the 26S proteasome
YDR316W	OMS1	-0.0314255	Protein integral to the mitochondrial membrane
YDR387C	YDR387C	-0.0314255	Putative transporter
YFL065C	YFL065C	-0.0314255	Putative protein of unknown function
YLR156W	YLR156W	-0.0314255	Putative protein of unknown function
YGL216W	KIP3	-0.0347812	Kinesin-related antiparallel sliding motor protein
YLR205C	HMX1	-0.0347812	ER localized heme oxygenase
YGL229C	SAP4	-0.0381368	Protein required for function of the Sit4p protein phosphatase
YKL025C	PAN3	-0.0381368	Essential subunit of the Pan2p-Pan3p poly(A)-ribonuclease complex
YMR133W	REC114	-0.0381368	Protein involved in early stages of meiotic recombination
YNR019W	ARE2	-0.0381368	Acyl-CoA:sterol acyltransferase
YMR024W	MRPL3	-0.0381368	Mitochondrial ribosomal protein of the large subunit
YGR295C	COS6	-0.0381368	Endosomal protein involved in turnover of plasma membrane proteins
YNL156C	NSG2	-0.0381368	Protein involved in regulation of sterol biosynthesis
YGL160W	YGL160W	-0.0381368	NADPH oxidase localized to the perinuclear ER
YOR326W	MYO2	-0.0414925	Type V myosin motor involved in actin-based transport of cargos
YDL090C	RAM1	-0.0414925	Beta subunit of the CAAX farnesyltransferase (FTase)
YPL126W	NAN1	-0.0414925	U3 snoRNP protein
YBL101C	ECM21	-0.0414925	Alpha-arrestin, ubiquitin ligase adaptor for Rsp5p
YDL210W	UGA4	-0.0414925	GABA (gamma-aminobutyrate) permease
YDL183C	YDL183C	-0.0414925	Protein that may form an active mitochondrial KHE system
YLR218C	YLR218C	-0.0414925	Twin Cx(9)C protein involved in cytochrome c oxidase organization
YIL045W	PIG2	-0.0448482	Putative type-1 protein phosphatase targeting subunit
YOL102C	TPT1	-0.0448482	tRNA 2'-phosphotransferase that catalyzes final step in tRNA splicing
YAR033W	MST28	-0.0448482	Putative integral membrane protein, involved in vesicle formation
YLR466W	YRF1-4	-0.0448482	Helicase encoded by the Y' element of subtelomeric regions
YLR148W	PEP3	-0.0448482	Component of CORVET membrane tethering complex
YIL161W	YIL161W	-0.0448482	Putative protein of unknown function
YLL064C	YLL064C	-0.0448482	Protein of unknown function
YGL159W	YGL159W	-0.0448482	Putative protein of unknown function
YKL162C	YKL162C	-0.0448482	Putative protein of unknown function
YGL166W	CUP2	-0.0482038	Copper-binding transcription factor
YKL149C	DBR1	-0.0482038	RNA lariat debranching enzyme
YGR112W	SHY1	-0.0482038	Mitochondrial inner membrane protein required for complex IV assembly
YMR065W	KAR5	-0.0482038	Protein required for nuclear membrane fusion during karyogamy
YGL170C	SPO74	-0.0482038	Component of the meiotic outer plaque of the spindle pole body
YGR033C	FMP17	-0.0482038	Nonessential component of the TIM23 complex
YGR173W	GIR1	-0.0482038	Protein with a role in translation
YGR105W	VMA21	-0.0515595	Integral membrane protein required for V-ATPase function
YDR221W	YDR221W	-0.0515595	Glucosidase II beta subunit, forms a complex with alpha subunit Rot2p
YDL182W	LYS20	-0.0549152	Homocitrate synthase isozyme and functions in DNA repair
YFR041C	ERJ5	-0.0549152	Type I membrane protein with a J domain
YOR308C	SNU66	-0.0582708	Component of the U4/U6.U5 snRNP complex
YOR147W	MDM32	-0.0582708	Mitochondrial inner membrane protein with similarity to Mdm31p
YMR001C	CDC5	-0.0582708	Polo-like kinase essential for mitotic cell cycle
YCR079W	YCR079W	-0.0582708	Mitochondrial type 2C protein phosphatase (PP2C)
YAL031C	FUN21	-0.0582708	Cytoplasmic protein that regulates protein phosphatase 1 Glc7p
YHR101C	BIG1	-0.0616265	Integral membrane protein of the endoplasmic reticulum
YOL095C	HMI1	-0.0616265	Mitochondrial inner membrane localized ATP-dependent DNA helicase
YDR041W	RSM10	-0.0616265	Mitochondrial ribosomal protein of the small subunit
YGL235W	YGL235W	-0.0616265	Putative protein of unknown function
YOL059W	GPD2	-0.0649822	NAD-dependent glycerol 3-phosphate dehydrogenase
YOR123C	LEO1	-0.0649822	Component of the Paf1 complex
YBR214W	SDS24	-0.0649822	Protein involved in cell separation during budding
YPL005W	AEP3	-0.0649822	Peripheral mitochondrial inner membrane protein
YOR180C	DCI1	-0.0649822	Peroxisomal protein
YPL283C	YRF1-7	-0.0649822	Helicase encoded by the Y' element of subtelomeric regions
YBL103C	RTG3	-0.0683378	bHLH/Zip transcription factor for retrograde (RTG) and TOR pathways
YGR143W	SKN1	-0.0683378	Protein involved in sphingolipid biosynthesis
YGR014W	MSB2	-0.0683378	Mucin family member involved in various signaling pathways
YJR075W	HOC1	-0.0683378	Alpha-1,6-mannosyltransferase
YFR049W	YMR31	-0.0683378	Subunit of the mitochondrial alpha-ketoglutarate dehydrogenase
YIL049W	DFG10	-0.0683378	Probable polyprenol reductase
YAL064W	YAL064W	-0.0683378	Protein of unknown function
YLR293C	GSP1	-0.0716935	Ran GTPase
YMR261C	TPS3	-0.0716935	Regulatory subunit of trehalose-6-phosphate synthase/phosphatase
YJR040W	GEF1	-0.0716935	Voltage-gated chloride channel
YLL062C	MHT1	-0.0716935	S-methylmethionine-homocysteine methyltransferase
YER031C	YPT31	-0.0716935	Rab family GTPase
YML034W	SRC1	-0.0750491	Inner nuclear membrane protein
YNL009W	IDP3	-0.0750491	Peroxisomal NADP-dependent isocitrate dehydrogenase
YLL011W	SOF1	-0.0750491	Protein required for biogenesis of 40S (small) ribosomal subunit
YIR028W	DAL4	-0.0750491	Allantoin permease
YJL023C	PET130	-0.0750491	Protein of unknown function
YPL163C	SVS1	-0.0784048	Cell wall and vacuolar protein
YJL194W	CDC6	-0.0817605	Essential ATP-binding protein required for DNA replication
YGL045W	RIM8	-0.0817605	Protein involved in proteolytic activation of Rim101p
YBR216C	YBP1	-0.0817605	Protein involved in cellular response to oxidative stress
YOL144W	NOP8	-0.0817605	Nucleolar protein required for 60S ribosomal subunit biogenesis
YKR095W	MLP1	-0.0817605	Myosin-like protein associated with the nuclear envelope
YBR127C	VMA2	-0.0817605	Subunit B of V1 peripheral membrane domain of vacuolar H+-ATPase
YDL088C	ASM4	-0.0851161	FG-nucleoporin component of central core of nuclear pore complex (NPC)
YLR003C	YLR003C	-0.0851161	Putative subunit of the 90S preribosome processome complex
YJL173C	RFA3	-0.0851161	Subunit of heterotrimeric Replication Protein A (RPA)
YKL020C	SPT23	-0.0851161	ER membrane protein involved in regulation of OLE1 transcription
YER087C-B	SBH1	-0.0851161	Beta subunit of Sec61p ER translocation complex (Sec61p-Sss1p-Sbh1p)
YKR039W	GAP1	-0.0851161	General amino acid permease
YOR269W	PAC1	-0.0884718	Regulator of dynein, involved in intracellular transport
YIL112W	HOS4	-0.0884718	Subunit of the Set3 complex
YMR175W	SIP18	-0.0884718	Phospholipid-binding hydrophilin
YGR277C	YGR277C	-0.0884718	Subunit of the CoA-Synthesizing Protein Complex (CoA-SPC)
YMR012W	CLU1	-0.0884718	Subunit of the eukaryotic translation initiation factor 3 (eIF3)
YOR083W	WHI5	-0.0884718	Repressor of G1 transcription
YLR009W	RLP24	-0.0884718	Essential protein required for ribosomal large subunit biogenesis
YDR087C	RRP1	-0.0884718	Essential evolutionarily conserved nucleolar protein
YML007W	YAP1	-0.0918275	Basic leucine zipper (bZIP) transcription factor
YHL009C	YAP3	-0.0918275	Basic leucine zipper (bZIP) transcription factor
YIL070C	MAM33	-0.0918275	Specific translational activator for the mitochondrial COX1 mRNA
YDR285W	ZIP1	-0.0918275	Transverse filament protein of the synaptonemal complex
YKL088W	YKL088W	-0.0918275	Subunit of PPCDC and CoA-SPC complexes involved in CoA biosynthesis
YGR123C	PPT1	-0.0918275	Protein serine/threonine phosphatase
YGL091C	NBP35	-0.0918275	Essential cytoplasmic iron-sulfur cluster binding protein
YBR244W	GPX2	-0.0951831	Phospholipid hydroperoxide glutathione peroxidase
YJL025W	RRN7	-0.0951831	Component of the core factor (CF) rDNA transcription factor complex
YML004C	GLO1	-0.0951831	Monomeric glyoxalase I
YMR316W	DIA1	-0.0951831	Protein of unknown function
YER132C	PMD1	-0.0951831	Protein with an N-terminal kelch-like domain
YLR288C	MEC3	-0.0985388	DNA damage and meiotic pachytene checkpoint protein
YHR132C	ECM14	-0.0985388	Putative metalloprotease with similarity to zinc carboxypeptidases
YMR101C	SRT1	-0.0985388	Forms the dehydrodolichyl diphosphate synthase (DDS) complex with NUS1
YBR280C	YBR280C	-0.0985388	F-Box protein involved in proteasome-dependent degradation of Aah1p
YLR039C	RIC1	-0.101894	Protein involved in retrograde transport to the cis-Golgi network
YDR412W	YDR412W	-0.101894	Component of the pre-60S pre-ribosomal particle
YCR094W	CDC50	-0.101894	Endosomal protein that interacts with phospholipid flippase Drs2p
YGR225W	AMA1	-0.101894	Activator of meiotic anaphase promoting complex (APC/C)
YOL045W	PSK2	-0.101894	PAS-domain containing serine/threonine protein kinase
YPR132W	RPS23B	-0.101894	Ribosomal protein 28 (rp28) of the small (40S) ribosomal subunit
YPR185W	ATG13	-0.101894	Regulatory subunit of the Atg1p signaling complex
YJR156C	THI11	-0.101894	Protein involved in synthesis of the thiamine precursor HMP
YLR454W	FMP27	-0.101894	Putative protein of unknown function
YLR315W	NKP2	-0.101894	Central kinetochore protein and subunit of the Ctf19 complex
YJR088C	YJR088C	-0.101894	Member of conserved ER transmembrane complex
YOR178C	GAC1	-0.10525	Regulatory subunit for Glc7p type-1 protein phosphatase (PP1)
YDR227W	SIR4	-0.10525	SIR protein involved in assembly of silent chromatin domains
YOR295W	UAF30	-0.10525	Subunit of UAF (upstream activation factor) complex
YMR228W	MTF1	-0.10525	Mitochondrial RNA polymerase specificity factor
YNR017W	MAS6	-0.10525	Essential component of the TIM23 complex
YLR378C	SEC61	-0.10525	Conserved ER protein translocation channel
YNR028W	CPR8	-0.10525	Peptidyl-prolyl cis-trans isomerase (cyclophilin)
YHR177W	GON3	-0.10525	Putative transcription factor containing a WOPR domain
YPR199C	ARR1	-0.108606	Transcriptional activator of the basic leucine zipper (bZIP) family
YOL052C	SPE2	-0.108606	S-adenosylmethionine decarboxylase
YOL009C	MDM12	-0.108606	Mitochondrial outer membrane protein, ERMES complex subunit
YPR176C	BET2	-0.108606	Beta subunit of Type II geranylgeranyltransferase
YLR221C	RSA3	-0.108606	Protein with a likely role in ribosomal maturation
YNL116W	YNL116W	-0.111961	Ubiquitin-protein ligase (E3)
YHR135C	YCK1	-0.111961	Palmitoylated plasma membrane-bound casein kinase I (CK1) isoform
YKL015W	PUT3	-0.111961	Transcriptional activator
YOR278W	HEM4	-0.111961	Uroporphyrinogen III synthase
YOR149C	SMP3	-0.111961	Alpha 1,2-mannosyltransferase
YBR050C	REG2	-0.115317	Regulatory subunit of the Glc7p type-1 protein phosphatase
YJR105W	ADO1	-0.115317	Adenosine kinase
YBR056W-A	YBR056W-A	-0.115317	Putative membrane protein upregulated in toxic manganese levels
YLL055W	YLL055W	-0.115317	High-affinity cysteine-specific transporter
YGL157W	YGL157W	-0.115317	NADPH-dependent aldehyde reductase
YCL061C	MRC1	-0.118673	S-phase checkpoint protein required for DNA replication
YIL072W	HOP1	-0.118673	Meiosis-specific protein required for chromosome synapsis
YIL104C	SHQ1	-0.118673	Chaperone protein
YDR312W	SSF2	-0.118673	Protein required for ribosomal large subunit maturation
YHR037W	PUT2	-0.118673	Delta-1-pyrroline-5-carboxylate dehydrogenase
YBL020W	RFT1	-0.118673	Membrane protein required for translocation of Man5GlcNac2-PP-Dol
YLR120C	YPS1	-0.118673	Aspartic protease
YJR112W	NNF1	-0.122028	Essential component of the outer kinetochore MIND complex
YHR123W	EPT1	-0.122028	sn-1,2-diacylglycerol ethanolamine- and cholinephosphotranferase
YAL055W	PEX22	-0.122028	Putative peroxisomal membrane protein
YGL110C	CUE3	-0.122028	Subunit of ribosome-associated quality control trigger complex (RQT)
YKL086W	SRX1	-0.125384	Sulfiredoxin
YMR273C	ZDS1	-0.125384	Protein with a role in regulating Swe1p-dependent polarized growth
YDL117W	CYK3	-0.125384	SH3-domain protein located in the bud neck and cytokinetic actin ring
YBL004W	UTP20	-0.125384	Component of the small-subunit (SSU) processome
YHL024W	RIM4	-0.125384	Putative RNA-binding protein
YAR015W	ADE1	-0.125384	N-succinyl-5-aminoimidazole-4-carboxamide ribotide synthetase
YDR540C	YDR540C	-0.125384	Protein similar to bacterial secreted DfsB proteins
YKL143W	LTV1	-0.125384	Subunit of the EGO/GSE complex
YGR026W	YGR026W	-0.125384	Putative protein of unknown function
YLR253W	YLR253W	-0.125384	Mitochondrial protein of unknown function involved in lipid homeostas
YHR187W	IKI1	-0.12874	Subunit of hexameric RecA-like ATPase Elp456 Elongator subcomplex
YOR017W	PET127	-0.12874	Protein with a role in 5'-end processing of mitochondrial RNAs
YNL151C	RPC31	-0.12874	RNA polymerase III subunit C31
YKL108W	SLD2	-0.12874	Single-stranded DNA origin-binding and annealing protein
YML062C	MFT1	-0.12874	Subunit of the THO complex
YNL052W	COX5A	-0.12874	Subunit Va of cytochrome c oxidase
YDR084C	TVP23	-0.12874	Integral membrane protein
YOR061W	CKA2	-0.132095	Alpha' catalytic subunit of casein kinase 2 (CK2)
YDR323C	PEP7	-0.132095	Adaptor protein involved in vesicle-mediated vacuolar protein sorting
YER172C	BRR2	-0.132095	RNA-dependent ATPase RNA helicase (DEIH box)
YGR080W	TWF1	-0.132095	Twinfilin
YDR044W	HEM13	-0.132095	Coproporphyrinogen III oxidase
YDR515W	SLF1	-0.132095	RNA binding protein that associates with polysomes
YCR011C	ADP1	-0.132095	Putative ATP-dependent permease of the ABC transporter family
YLR309C	IMH1	-0.132095	Protein involved in vesicular transport
YBR007C	YBR007C	-0.132095	Deletion suppressor of mpt5 mutation
YOR286W	FMP31	-0.132095	Protein with rhodanese activity
YCR073C	SSK22	-0.135451	MAP kinase kinase kinase of HOG1 mitogen-activated signaling pathway
YNL173C	MDG1	-0.135451	Plasma membrane protein
YGR092W	DBF2	-0.135451	Ser/Thr kinase involved in transcription and stress response
YIR029W	DAL2	-0.135451	Allantoicase
YBR269C	FMP21	-0.135451	Protein required for assembly of succinate dehydrogenase
YCR102C	YCR102C	-0.135451	Putative quinone oxidoreductase
YER112W	LSM4	-0.138807	Lsm (Like Sm) protein
YBR076W	ECM8	-0.138807	Non-essential protein of unknown function
YJR084W	CSN12	-0.138807	Protein that forms a complex with Thp3p
YML116W	ATR1	-0.138807	Multidrug efflux pump of the major facilitator superfamily
YFL050C	ALR2	-0.138807	Probable Mg(2+) transporter
YPL058C	PDR12	-0.138807	Plasma membrane ATP-binding cassette (ABC) transporter
YKL080W	VMA5	-0.138807	Subunit C of the V1 peripheral membrane domain of V-ATPase
YHR215W	PHO12	-0.138807	One of three repressible acid phosphatases
YDR532C	YDR532C	-0.138807	Subunit of a kinetochore-microtubule binding complex
YER158C	YER158C	-0.138807	Protein of unknown function
YKL106C-A	YKL106C-A	-0.138807	Putative protein of unknown function
YOR032C	HMS1	-0.142162	bHLH protein with similarity to myc-family transcription factors
YGL097W	SRM1	-0.142162	Nucleotide exchange factor for Gsp1p
YPR010C	RPA135	-0.142162	RNA polymerase I second largest subunit A135
YDL164C	CDC9	-0.142162	DNA ligase I found in nucleus and mitochondria
YGL174W	BUD13	-0.142162	Subunit of the RES complex
YDL036C	YDL036C	-0.142162	Mitochondrial tRNA:pseudouridine synthase
YML054C	CYB2	-0.145518	Cytochrome b2 (L-lactate cytochrome-c oxidoreductase)
YJR141W	YJR141W	-0.145518	Protein implicated in pre-mRNA processing and proteasomal degradation
YJL091C	GWT1	-0.145518	Protein involved in the inositol acylation of GlcN-PI
YPL148C	PPT2	-0.145518	Phosphopantetheine:protein transferase (PPTase)
YJL053W	PEP8	-0.145518	Vacuolar protein component of the retromer
YDR468C	TLG1	-0.145518	Essential t-SNARE that mediates fusion of vesicles with the late Golgi
YOL018C	TLG2	-0.145518	Syntaxin-like t-SNARE
YNL127W	FAR11	-0.148874	Protein involved in recovery from cell cycle arrest
YNL012W	SPO1	-0.148874	Meiosis-specific prospore protein
YMR125W	STO1	-0.148874	Large subunit of the nuclear mRNA cap-binding protein complex
YCL068C	YCL068C	-0.148874	Putative protein of unknown function
YDR476C	YDR476C	-0.148874	Putative protein of unknown function
YOL139C	CDC33	-0.152229	Translation initiation factor eIF4E
YKL096W-A	CWP2	-0.152229	Covalently linked cell wall mannoprotein
YKR104W	NFT1	-0.152229	Putative transporter of the MRP subfamily
YPL274W	SAM3	-0.152229	High-affinity S-adenosylmethionine permease
YNL294C	RIM21	-0.152229	pH sensor molecule, component of the RIM101 pathway
YFL064C	YFL064C	-0.152229	Putative protein of unknown function
YLL016W	SDC25	-0.155585	Non-essential Ras guanine nucleotide exchange factor (GEF)
YIL139C	REV7	-0.155585	Accessory subunit of DNA polymerase zeta
YOR363C	PIP2	-0.155585	Autoregulatory, oleate-activated transcription factor
YJL133C-A	YJL133C-A	-0.155585	Putative mitochondrial protein of unknown function
YJR111C	YJR111C	-0.155585	Peroxisomal matrix protein with naturally active promoter
YIL165C	YIL165C	-0.155585	Putative protein of unknown function
YHR027C	RPN1	-0.158941	Non-ATPase base subunit of the 19S RP of the 26S proteasome
YOR120W	GCY1	-0.162296	Glycerol dehydrogenase
YOR229W	WTM2	-0.162296	Transcriptional modulator
YOL121C	RPS19A	-0.162296	Protein component of the small (40S) ribosomal subunit
YDR007W	TRP1	-0.162296	Phosphoribosylanthranilate isomerase
YML001W	YPT7	-0.162296	Rab family GTPase
YIL029C	YIL029C	-0.162296	Protein involved in targeting mitochondrial membrane protein precursor
YDR174W	HMO1	-0.165652	Chromatin associated high mobility group (HMG) family member
YDR171W	HSP42	-0.165652	Small heat shock protein (sHSP) with chaperone activity
YOR176W	HEM15	-0.165652	Ferrochelatase
YKL184W	SPE1	-0.165652	Ornithine decarboxylase
YBR003W	COQ1	-0.165652	Hexaprenyl pyrophosphate synthetase
YMR193W	MRPL24	-0.165652	Mitochondrial ribosomal protein of the large subunit
YLR088W	GAA1	-0.165652	Subunit of the GPI:protein transamidase complex
YPL100W	ATG21	-0.165652	Phosphoinositide binding protein
YER123W	YCK3	-0.165652	Palmitoylated vacuolar membrane-localized casein kinase I isoform
YGR163W	GTR2	-0.165652	Subunit of a TORC1-stimulating GTPase and the EGO/GSE complex
YOL030W	GAS5	-0.165652	1,3-beta-glucanosyltransferase
YCR108C	YCR108C	-0.165652	Putative protein of unknown function
YJL097W	YJL097W	-0.165652	Essential 3-hydroxyacyl-CoA dehydratase of the ER membrane
YNL027W	CRZ1	-0.169008	Transcription factor, activates transcription of stress response genes
YPR008W	HAA1	-0.169008	Transcriptional activator involved in adaptation to weak acid stress
YML023C	YML023C	-0.169008	Component of the SMC5-SMC6 complex
YNR022C	MRPL50	-0.169008	Mitochondrial ribosomal protein of the large subunit
YOL013C	HRD1	-0.169008	Ubiquitin-protein ligase involved in ER-associated degradation (ERAD)
YNR055C	HOL1	-0.169008	Putative transporter in the major facilitator superfamily
YLR259C	HSP60	-0.169008	Tetradecameric mitochondrial chaperonin
YBR301W	DAN3	-0.169008	Cell wall mannoprotein
YDR328C	SKP1	-0.172363	Evolutionarily conserved kinetochore protein
YDR045C	RPC11	-0.172363	RNA polymerase III subunit C11
YGL191W	COX13	-0.172363	Subunit VIa of cytochrome c oxidase
YKR079C	YKR079C	-0.172363	tRNA 3'-end processing endonuclease tRNase Z
YEL027W	CUP5	-0.172363	Proteolipid subunit c of the V0 domain of vacuolar H(+)-ATPase
YDR035W	ARO3	-0.172363	3-deoxy-D-arabino-heptulosonate-7-phosphate (DAHP) synthase
YKL048C	ELM1	-0.172363	Serine/threonine protein kinase
YPL085W	SEC16	-0.172363	COPII vesicle coat protein required for ER transport vesicle budding
YHR016C	YSC84	-0.172363	Actin-binding protein
YFR044C	YFR044C	-0.172363	Cys-Gly metallo-di-peptidase
YFL067W	YFL067W	-0.172363	Protein of unknown function
YFL034C-B	MOB2	-0.175719	Activator of Cbk1p kinase
YGR074W	SMD1	-0.175719	Core Sm protein Sm D1
YDL168W	SFA1	-0.175719	Bifunctional alcohol dehydrogenase and formaldehyde dehydrogenase
YKL072W	STB6	-0.175719	Protein that binds Sin3p in a two-hybrid assay
YLR209C	PNP1	-0.175719	Purine nucleoside phosphorylase
YCR027C	RHB1	-0.179075	Putative Rheb-related GTPase
YMR143W	RPS16A	-0.179075	Protein component of the small (40S) ribosomal subunit
YEL046C	GLY1	-0.179075	Threonine aldolase
YOL031C	SIL1	-0.179075	Nucleotide exchange factor for the ER lumenal Hsp70 chaperone Kar2p
YHR199C	FMP34	-0.179075	Protein of unknown function
YJR043C	POL32	-0.18243	Third subunit of DNA polymerase delta
YNL288W	CAF40	-0.18243	Component of the CCR4-NOT transcriptional complex
YNR038W	DBP6	-0.18243	Essential protein involved in ribosome biogenesis
YOL021C	DIS3	-0.18243	Exosome core complex catalytic subunit
YNL202W	SPS19	-0.18243	Peroxisomal 2,4-dienoyl-CoA reductase
YCR032W	BPH1	-0.18243	Protein homologous to Chediak-Higashi syndrome and Beige proteins
YDR223W	YDR223W	-0.18243	Transcriptional corepressor
YBR093C	PHO5	-0.185786	Repressible acid phosphatase
YNL103W	MET4	-0.185786	Leucine-zipper transcriptional activator
YER063W	THO1	-0.185786	Conserved nuclear RNA-binding protein
YJL044C	GYP6	-0.185786	GTPase-activating protein (GAP) for yeast Rab family member Ypt6p
YHR092C	HXT4	-0.185786	High-affinity glucose transporter
YER188C-A	YER188C-A	-0.185786	Putative protein of unknown function
YBR284W	YBR284W	-0.185786	Putative metallo-dependent hydrolase superfamily protein
YLR419W	YLR419W	-0.185786	Putative helicase with limited sequence similarity to human Rb protein
YJL037W	YJL037W	-0.185786	Protein involved in outer spore wall assembly
YPR062W	FCY1	-0.189142	Cytosine deaminase
YNL339C	YRF1-6	-0.189142	Helicase encoded by the Y' element of subtelomeric regions
YPL040C	ISM1	-0.189142	Mitochondrial isoleucyl-tRNA synthetase
YDR192C	NUP42	-0.189142	FG-nucleoporin component of central core of the nuclear pore complex
YBR005W	YBR005W	-0.189142	Plasma membrane (PM) ubiquitin ligase-substrate adaptor
YPR104C	FHL1	-0.192497	Regulator of ribosomal protein (RP) transcription
YDR125C	ECM18	-0.192497	Protein of unknown function
YHR163W	SOL3	-0.192497	6-phosphogluconolactonase
[truncated: 1,696 more rows]

## Sheet: GO Terms and Significance
GO Terms and Significance (http://geneontology.org)
Ontological Class	GO Term	NegLog10(P)	Bonferroni-corrected P-value (Fisher's Exact Test)	Fold Enrichment
Molecular Function	Carboxylic Ester Hydrolase Activity (GO:0052689)	1.75449	0.0176	11.9
Molecular Function	Lipase Activity (GO:0016298)	2.66959	0.00214	17.7
Biological Process	Lipid Catabolic Process (GO:0016042)	1.52143	0.0301	12.1
Biological Process	Sterol Metabolic Process (GO:0016125)	2.08407	0.00824	15.44
Cellular Component	Lipid Droplet (GO:0005811)	10.7055	1.97e-11	28.23

## Sheet: GO Term
GO Term (http://geneontology.org)
Biological Process				Molecular Function				Cellular Component
Sterol Metabolic Process (GO:0016125)		Lipid Catabolic Process (GO:0016042)		Lipase Activity (GO:0016298)		Catabolic Ester Hydrolase Activity (GO:0052689)		Lipid Droplet (GO:0005811)
6 genes with DHFR Z>2.5 out of 0.39 expected		6 genes with DHFR Z>2.5 out of 0.5 expected		6 genes with DHFR Z>2.5 out of 0.34 expected		6 genes with DHFR Z>2.5 out of 0.5 expected		14 genes with DHFR Z>2.5 out of 0.5 expected
DHFR[3] Gene	Noise-filtered DHFR Z-Score	DHFR[3] Gene	Noise-filtered DHFR Z-Score	DHFR[3] Gene	Noise-filtered DHFR Z-Score	DHFR[3] Gene	Noise-filtered DHFR Z-Score	DHFR[3] Gene	Noise-filtered DHFR Z-Score
ERG6	6.73359	AYR1	7.80405	AYR1	7.80405	AYR1	7.80405	YEH1	4.49201
YEH1	4.49201	YJU3	5.47186	YJU3	5.47186	YJU3	5.47186	SAY1	2.61955
ERG7	4.38798	EHT1	5.13294	EHT1	5.13294	EHT1	5.13294	FAT1	9.13289
TGL1	4.33765	YEH1	4.49201	YEH1	4.49201	YEH1	4.49201	YIM1	2.62962
PDR16	4.23698	TGL1	4.33765	TGL1	4.33765	TGL1	4.33765	YJU3	5.47186
SAY1	2.61955	LDH1	3.3578	LDH1	3.3578	LDH1	3.3578	TGL1	4.33765
								LDH1	3.3578
								ERG6	6.73359
								ERG7	4.38798
								EHT1	5.13294
								AYR1	7.80405
								PDR16	4.23698
								FAA4	7.80405
								RER2	5.56918
