# Supplementary material for: Systematic analysis of membrane contact sites in Saccharomyces cerevisiae uncovers modulators of cellular lipid distribution
Source: eLife. 2022 Nov 10;11:e74602. doi: 10.7554/eLife.74602 (PMC9648973; doi:10.7554/eLife.74602)
Supplement: Figure 5—figure supplement 1—source data 1. [file elife-74602-fig5-figsupp1-data1.xlsx]

## Sheet: Raw data
	LD number
	WT			Δypr097w			TDH3pr-YPR097W
Cell	Exp 1	Exp 2	Exp 3	Exp 1	Exp 2	Exp 3	Exp 1	Exp 2	Exp 3
1	7	1	2	6	3	4	1	7	3
2	2	3	4	6	3	7	2	3	2
3	2	4	4	5	1	4	8	6	3
4	4	3	4	4	2	2	2	3	4
5	3	5	3	6	4	5	2	4	5
6	3	4	5	1	3	3	3	2	4
7	6	4	3	4	6	4	4	2	1
8	3	3	2	3	8	3	1	3	1
9	2	3	5	4	1	4	2	2	3
10	3	7	3	2	4	3	7	4	10
11	5	6	2	4	3	5	4	3	2
12	5	4	5	3	4	8	6	4	2
13	7	6	3	7	3	3	5	3	4
14	4	2	6	4	5	3	3	1	1
15	2	4	5	4	3	3	6	5	3
16	3	3	5	3	4	3	8	2	5
17	5	7	1	4	3	2	4	8	5
18	4	5	5	2	3	5	5	4	6
19	6	5	2	5	3	5	2	3	5
20	4	3	0	4	5	3	3	6	2
21	7	8	4	3	4	1	5	6	2
22	5	7	4	5	5	4	6	1	2
23	9	3	5	5	3	2	4	3	2
24	6	2	2	6	8	7	4	6	4
25	5	7	3	6	3	5	2	2	6
26	3	5	4	4	2	0	3	3	2
27	9	1	2	2	4	3	5	7	4
28	2	3	7	4	1	3	4	2	5
29	6	2	2	3	3	4	5	3	3
30	9	4	3	5	3	2	2	5	1
31	2	12	3	6	3	5	6	5	1
32	4	6	5	4	5	2	7	3	3
33	2	5	3	5	4	3	1	2	5
34	2	8	7	4	2	4	3	2	2
35	10	2	3	4	5	1	3	4	2
36	3	3	2	7	7	2	2	11	8
37	3	3	4	8	6	2	3	4	4
38	6	4	3	3	3	7	8	5	3
39	6	5	7	5	4	5	4	5	3
40	2	6	3	2	5	4	1	9	5
41	3	4	0	6	3	6	6	2	7
42	6	2	2	3	2	2	4	2	2
43	5	6	3	4	8	2	4	3	8
44	2	3	3	7	1	6	6	2	1
45	1	2	4	6	2	5	5	5	2
46	4	5	3	2	5	3	6	6	1
47	3	1	2	5	4	2	5	2	4
48	3	4	1	5	3	5	3	6	4
49	5	6	1	3	3	7	2	2	3
50	12	3	5	6	4	5	5	1	3
51	7	5	4	5	6	2	3	7	5
52	3	3	2	7	7	7	2	4	1
53	5	4	3	3	6	7	4	6	2
54	6	3	3	6	5	6	3	4	5
55	4	5	3	4	5	4	4	5	2
56	10	7	5	9	5	6	3	8	2
57	6	3	3	5	7	3	4	3	3
58	4	7	2	3	4	3	2	4	4
59	5	7	7	4	6	2	1	5	3
60	3	2	3	8	7	3	3	4	6
61	7	4	3	10	2	4	5	3	2
62	2	5	2	6	1	4	3	10	2
63	3	5	5	5	3	6	7	5	3
64	3	9	3	2	3	5	3	4	4
65	5	3	6	5	1	3	2	5	5
66	4	8	2	3	8	5	4	5	2
67	3	4	2	3	8	3	4	3	3
68	8	3	3	5	1	4	6	3	4
69	6	5	4	5	2	5	3	2	4
70	3	5	2	4	5	4	4	4	2
71	6	5	2	1	4	3	5	1	5
72	7	4	7	7	3	5	3	3	4
73	3	7	3	5	3	2	4	1	3
74	6	3	4	1	5	3	4	4	2
75	4	2	2	2	3	6	5	5	5
76	5	3	6	5	6	4	3	2	2
77	9	3	2	1	2	4	2	5	2
78	4	2	3	5	4	2	3	5	1
79	10	4	5	1	4	5	8	1	5
80	4	8	4	3	5	5	6	6	5
81	3	7	3	2	5	2	3	2	4
82	6	2	3	5	2	4	1	3	1
83	1	3	1	4	8	3	1	2	9
84	2	1	4	9	3	5	3	7	4
85	5	3	4	4	4	5	2	1	1
86	3	4	7	5	2	6	5	3	4
87	5	6	5	5	2	5	4	3	3
88	8	3	2	3	7	1	6	3	4
89	6	1	5	4	6	4	5	5	6
90	4	4	3	4	2	2	3	3	2
91	3	4	4	2	5	8	7	4	4
92	6	3	2	6	2	3	5	3	4
93	4	2	3	5	7	3	3	2	1
94	2	3	5	3	2	0	6	2	5
95	7	3	4	7	3	3	3	1	5
96	4	5	4	3	4	3	4	3	3
97	8	5	4	8	2	0	3	1	2
98	2	4	7	7	8	2	4	1	4
99	2	2	5	6	2	1	3	4	6
100	6	4	1	4	4	3	7	9	3

## Sheet: Statistical results
ANOVA summary
F	0.719		Brown-Forsythe test			ANOVA table	SS	DF	MS	F (DFn, DFd)	P value
P value	0.5249		F (DFn, DFd)	0.5423 (2, 6)		Treatment (between columns)	0.2616	2	0.1308	F (2, 6) = 0.7190	P=0.5249
P value summary	ns		P value	0.6074		Residual (within columns)	1.092	6	0.1819
Significant diff. among means (P < 0.05)?	No		P value summary	ns		Total	1.353	8
R squared	0.1933		Are SDs significantly different (P < 0.05)?	No
Dunnett's multiple comparisons test	Mean Diff.	95.00% CI of diff.	Below threshold?	Summary	Adjusted P Value	A-?
WT vs. Δypr097w	0.05667	-0.9405 to 1.054	No	ns	0.9808	B	Δypr097w
WT vs. TDH3pr-YPR097W	0.3867	-0.6105 to 1.384	No	ns	0.4769	C	TDH3pr-YPR097W
Test details	Mean 1	Mean 2	Mean Diff.	SE of diff.	n1	n2	q	DF
WT vs. Δypr097w	4.127	4.07	0.05667	0.3483	3	3	0.1627	6
WT vs. TDH3pr-YPR097W	4.127	3.74	0.3867	0.3483	3	3	1.11	6
