# Supplementary material for: Systematic analysis of membrane contact sites in Saccharomyces cerevisiae uncovers modulators of cellular lipid distribution
Source: eLife. 2022 Nov 10;11:e74602. doi: 10.7554/eLife.74602 (PMC9648973; doi:10.7554/eLife.74602)
Supplement: Figure 5—figure supplement 2—source data 1. [file elife-74602-fig5-figsupp2-data1.xlsx]

## Sheet: Sheet1
Control
Time	Cyto	Bud / Bud neck	Puncta
0h	56	21	23
	72	14	14
	68	15	17
3h	51	22	27
	60	15	25
	55	14	31
Fluconazole
Time	Cyto	Bud / Bud neck	Puncta
0h	61	17	22
	63	18	19
	63	21	16
3h	58	24	18
	64	32	4
	63	28	9
