# Supplementary material for: Systematic analysis of membrane contact sites in Saccharomyces cerevisiae uncovers modulators of cellular lipid distribution
Source: eLife. 2022 Nov 10;11:e74602. doi: 10.7554/eLife.74602 (PMC9648973; doi:10.7554/eLife.74602)
Supplement: Figure 5—source data 1. [file elife-74602-fig5-data1.xlsx]

## Sheet: Raw data
Figure 5D - Cellular localization of the free ergosterol marker mCherry-D4H in WT, Δypr097w and overexpression TDH3pr-YPR097W cells. Cells were categorized based on marker distribution (mother+daughter cells or daughter) and localization (membrane, puncta or both), as well as accumulation at the bud neck.
Distribution		Mother+daughter	Daughter
WT	Experiment 1	51	49
	Experiment 2	39	61
	Experiment 3	44	56
Δypr097w	Experiment 1	36	64
	Experiment 2	16	84
	Experiment 3	24	76
TDH3pr-YPR097W	Experiment 1	87	13
	Experiment 2	72	28
	Experiment 3	75	25
Localization		Membrane	Both	Punctate
WT	Experiment 1	71	20	9
	Experiment 2	78	21	1
	Experiment 3	74	24	2
Δypr097w	Experiment 1	52	30	18
	Experiment 2	67	26	7
	Experiment 3	63	23	14
TDH3pr-YPR097W	Experiment 1	36	58	6
	Experiment 2	43	52	5
	Experiment 3	40	55	7
Bud neck accumulation		Bud neck
WT	Experiment 1	1
	Experiment 2	0
	Experiment 3	0
Δypr097w	Experiment 1	21
	Experiment 2	11
	Experiment 3	18
TDH3pr-YPR097W	Experiment 1	0
	Experiment 2	0
	Experiment 3	0

## Sheet: Statistical results
ANOVA summary - Distribution (mother+daughter)
F	31.83		Brown-Forsythe test			ANOVA table	SS	DF	MS	F (DFn, DFd)	P value
P value	0.0006		F (DFn, DFd)	0.1828 (2, 6)		Treatment (between columns)	4259	2	2129	F (2, 6) = 31.83	P=0.0006
P value summary	***		P value	0.8374		Residual (within columns)	401.3	6	66.89
Significant diff. among means (P < 0.05)?	Yes		P value summary	ns		Total	4660	8
R squared	0.9139		Are SDs significantly different (P < 0.05)?	No
Dunnett's multiple comparisons test	Mean Diff.	95.00% CI of diff.	Below threshold?	Summary	Adjusted P Value	A-?
WT vs. Δypr097w	19.33	0.2145 to 38.45	Yes	*	0.048	B	Δypr097w
WT vs. TDH3pr-YPR097W	-33.33	-52.45 to -14.21	Yes	**	0.0044	C	TDH3pr-YPR097W
Test details	Mean 1	Mean 2	Mean Diff.	SE of diff.	n1	n2	q	DF
WT vs. Δypr097w	44.67	25.33	19.33	6.678	3	3	2.895	6
WT vs. TDH3pr-YPR097W	44.67	78	-33.33	6.678	3	3	4.992	6
ANOVA summary - Localization (Membrane)
F	32.29		Brown-Forsythe test			ANOVA table	SS	DF	MS	F (DFn, DFd)	P value
P value	0.0006		F (DFn, DFd)	0.5378 (2, 6)		Treatment (between columns)	1830	2	914.8	F (2, 6) = 32.29	P=0.0006
P value summary	***		P value	0.6098		Residual (within columns)	170	6	28.33
Significant diff. among means (P < 0.05)?	Yes		P value summary	ns		Total	2000	8
R squared	0.915		Are SDs significantly different (P < 0.05)?	No
Dunnett's multiple comparisons test	Mean Diff.	95.00% CI of diff.	Below threshold?	Summary	Adjusted P Value	A-?
WT vs. Δypr097w	13.67	1.223 to 26.11	Yes	*	0.035	B	Δypr097w
WT vs. TDH3pr-YPR097W	34.67	22.22 to 47.11	Yes	***	0.0004	C	TDH3pr-YPR097W
Test details	Mean 1	Mean 2	Mean Diff.	SE of diff.	n1	n2	q	DF
WT vs. Δypr097w	74.33	60.67	13.67	4.346	3	3	3.145	6
WT vs. TDH3pr-YPR097W	74.33	39.67	34.67	4.346	3	3	7.976	6
ANOVA summary - Localization (Both)
F	114.2		Brown-Forsythe test			ANOVA table	SS	DF	MS	F (DFn, DFd)	P value
P value	<0.0001		F (DFn, DFd)	0.2414 (2, 6)		Treatment (between columns)	1955	2	977.3	F (2, 6) = 114.2	P<0.0001
P value summary	****		P value	0.7928		Residual (within columns)	51.33	6	8.556
Significant diff. among means (P < 0.05)?	Yes		P value summary	ns		Total	2006	8
R squared	0.9744		Are SDs significantly different (P < 0.05)?	No
Dunnett's multiple comparisons test	Mean Diff.	95.00% CI of diff.	Below threshold?	Summary	Adjusted P Value	A-?
WT vs. Δypr097w	-4.667	-11.50 to 2.171	No	ns	0.1652	B	Δypr097w
WT vs. TDH3pr-YPR097W	-33.33	-40.17 to -26.50	Yes	****	<0.0001	C	TDH3pr-YPR097W
Test details	Mean 1	Mean 2	Mean Diff.	SE of diff.	n1	n2	q	DF
WT vs. Δypr097w	21.67	26.33	-4.667	2.388	3	3	1.954	6
WT vs. TDH3pr-YPR097W	21.67	55	-33.33	2.388	3	3	13.96	6
ANOVA summary - Localization (Punctate)
F	3.941		Brown-Forsythe test			ANOVA table	SS	DF	MS	F (DFn, DFd)	P value
P value	0.0807		F (DFn, DFd)	0.7778 (2, 6)		Treatment (between columns)	134	2	67	F (2, 6) = 3.941	P=0.0807
P value summary	ns		P value	0.5008		Residual (within columns)	102	6	17
Significant diff. among means (P < 0.05)?	No		P value summary	ns		Total	236	8
R squared	0.5678		Are SDs significantly different (P < 0.05)?	No
Dunnett's multiple comparisons test	Mean Diff.	95.00% CI of diff.	Below threshold?	Summary	Adjusted P Value	A-?
WT vs. Δypr097w	-9	-18.64 to 0.6385	No	ns	0.0639	B	Δypr097w
WT vs. TDH3pr-YPR097W	-2	-11.64 to 7.638	No	ns	0.7853	C	TDH3pr-YPR097W
Test details	Mean 1	Mean 2	Mean Diff.	SE of diff.	n1	n2	q	DF
WT vs. Δypr097w	4	13	-9	3.367	3	3	2.673	6
WT vs. TDH3pr-YPR097W	4	6	-2	3.367	3	3	0.5941	6
ANOVA summary - Bud neck accumulation
F	30.64		Brown-Forsythe test			ANOVA table	SS	DF	MS	F (DFn, DFd)	P value
P value	0.0007		F (DFn, DFd)	2.395 (2, 6)		Treatment (between columns)	544.7	2	272.3	F (2, 6) = 30.64	P=0.0007
P value summary	***		P value	0.172		Residual (within columns)	53.33	6	8.889
Significant diff. among means (P < 0.05)?	Yes		P value summary	ns		Total	598	8
R squared	0.9108		Are SDs significantly different (P < 0.05)?	No
Dunnett's multiple comparisons test	Mean Diff.	95.00% CI of diff.	Below threshold?	Summary	Adjusted P Value	A-?
WT vs. Δypr097w	-16.33	-23.30 to -9.364	Yes	***	0.001	B	Δypr097w
WT vs. TDH3pr-YPR097W	0.3333	-6.636 to 7.303	No	ns	0.9864	C	TDH3pr-YPR097W
Test details	Mean 1	Mean 2	Mean Diff.	SE of diff.	n1	n2	q	DF
WT vs. Δypr097w	0.3333	16.67	-16.33	2.434	3	3	6.71	6
WT vs. TDH3pr-YPR097W	0.3333	0	0.3333	2.434	3	3	0.1369	6
