# Supplementary material for: Systematic analysis of membrane contact sites in Saccharomyces cerevisiae uncovers modulators of cellular lipid distribution
Source: eLife. 2022 Nov 10;11:e74602. doi: 10.7554/eLife.74602 (PMC9648973; doi:10.7554/eLife.74602)
Supplement: Supplementary file 3. — List of noise-filtered Ypr097w DHFR interactors (Z-Score >2.5). Hits with reported lipid droplet localization (data from Huh et al., 2003; Weill et al., 2018) or membership in a validated LD proteome (data from Currie et al., 2014) are colored pink, while hits with reported ER localization that are not present in the validated LD proteome are colored blue. [file elife-74602-supp3.xlsx]

## Sheet: Noise-filtered DHFR hits
Proteins that are in proximity to Ypr097w by DHFR protein fragment complementation assay
ORF	Gene	Noise-filtered DHFR Z-Score	Brief Description					Currie et al., 2014 Lipid Droplet Proteome (PMID:24868093)	Huh et al., 2003 Localization (PMID:14562095)	Weill et al., 2018 Localization (PMID:29988094)
								Component of validated LD proteome? (Yes/No)	C-terminal -GFP	NOP1pr-GFP	TEF2pr-mCherry	NATIVEpr-GFP
YKR046C	PLN1	18.1563	Perilipin, involved in formation and stability of lipid droplets					Yes	lipid particle	punctate	punctate	punctate
YDR276C	PMP3	11.7134	Small plasma membrane protein					No	ambiguous	cell periphery	missing	cell periphery
YBR041W	FAT1	9.13289	Very long chain fatty acyl-CoA synthetase and fatty acid transporter					Yes	lipid particle	cell periphery,ER,punctate	ER,punctate	punctate
YJL151C	SNA3	7.94163	Protein involved in efficient MVB sorting of proteins to the vacuole					No	vacuole	N/A	N/A	N/A
YIL124W	AYR1	7.80405	Bifunctional triacylglycerol lipase and 1-acyl DHAP reductase					Yes	ER	ER,punctate	ER,punctate	below threshold
YMR246W	FAA4	7.4215	Long chain fatty acyl-CoA synthetase					Yes	lipid particle	punctate	punctate	punctate
YML008C	ERG6	6.73359	Delta(24)-sterol C-methyltransferase					Yes	lipid particle	punctate	ER,punctate	ER,punctate
YER178W	PDA1	6.4685	E1 alpha subunit of the pyruvate dehydrogenase (PDH) complex					No	mitochondrion	mitochondria	punctate,mitochondria	punctate
YPR108W	RPN7	6.37454	Essential non-ATPase regulatory subunit of the 26S proteasome					No	nucleus	cytosol,nucleolus	nucleus	nucleus
YBR002C	RER2	5.56918	Forms the dehydrodolichyl diphosphate synthase (DDS) complex with NUS1					Yes	ER	ER,punctate	ER,punctate	ER,punctate
YKL094W	YJU3	5.47186	Monoglyceride lipase (MGL) that hydrolyzes fatty acid ethyl esters					Yes	ER	cell periphery,ER	cell periphery,ER	ER
YBR177C	EHT1	5.13294	Acyl-coenzymeA:ethanol O-acyltransferase					Yes	ER	N/A	N/A	N/A
YPR133W-A	TOM5	4.54906	Component of the TOM (translocase of outer membrane) complex					No	N/A	mitochondria	mitochondria	below threshold
YJL024C	APS3	4.53563	Small subunit of the clathrin-associated adaptor complex AP-3					No	punctate composite,Golgi to ER	cytosol,punctate	cytosol,punctate	punctate
YLL012W	YEH1	4.49201	Steryl ester hydrolase					No	lipid particle	punctate	below threshold	below threshold
YHR072W	ERG7	4.38798	Lanosterol synthase					Yes	lipid particle	punctate	punctate	punctate
YKL140W	TGL1	4.33765	Steryl ester hydrolase					Yes	punctate composite	punctate	punctate	punctate
YNL231C	PDR16	4.23698	Phosphatidylinositol transfer protein (PITP)					No	lipid particle	cytosol	cytosol	cytosol,punctate
YBL028C	YBL028C	3.96517	Protein of unknown function that may interact with ribosomes					No	nucleolus,nucleus	nucleus	vacuole	nucleus
YNL336W	COS1	3.95175	Endosomal protein involved in turnover of plasma membrane proteins					No	vacuole	vacuole	vacuole	below threshold
YIL041W	GVP36	3.64638	BAR domain protein that localizes to early and late Golgi vesicles					No	cytoplasm	cytosol	cytosol	cytosol,punctate
YGL054C	ERV14	3.61954	COPII-coated vesicle protein					No	ER,vacuole	cell periphery,ER,punctate	ER,vacuole	ER,vacuole
YGL195W	GCN1	3.5692	Positive regulator of the Gcn2p kinase activity					No	cytoplasm	cytosol	cell periphery,bud neck	cytosol
YBR204C	LDH1	3.3578	Serine hydrolase					Yes	N/A	ER	ER	below threshold
YPR048W	TAH18	3.1531	Conserved NAPDH-dependent diflavin reductase					No	N/A	cytosol	cytosol	below threshold
YGR233C	PHO81	3.0927	Cyclin-dependent kinase (CDK) inhibitor					No	cytoplasm,nucleus	cytosol	cytosol,punctate	cytosol,nucleus
YBR188C	NTC20	2.98867	Member of the NineTeen Complex (NTC)					No	nucleus	cytosol	cytosol	nucleus
YLR063W	BMT6	2.91485	Methyltransferase required for m3U2843 methylation of the 25S rRNA					No	cytoplasm	mitochondria	mitochondria	mitochondria
YBR011C	IPP1	2.90478	Cytoplasmic inorganic pyrophosphatase (PPase)					No	cytoplasm,nucleus	cytosol	cytosol	missing
YPR028W	YOP1	2.89136	Reticulon-interacting protein					No	ER	cell periphery,ER,bud	cell periphery,ER,bud	cell periphery,ER,punctate
YLR326W	YLR326W	2.89136	Putative protein of unknown function					No	ambiguous	cell periphery	cell periphery,vacuole	cytosol
YMR064W	AEP1	2.86787	Protein required for expression of the mitochondrial OLI1 gene					No	mitochondrion	nucleus	nucleus	below threshold
YNL331C	AAD14	2.84102	Putative aryl-alcohol dehydrogenase					No	N/A	cytosol	cytosol	punctate
YML109W	ZDS2	2.78733	Protein with a role in regulating Swe1p-dependent polarized growth					No	cytoplasm	cytosol	cytosol	missing
YOR113W	AZF1	2.74371	Zinc-finger transcription factor					No	nucleus	nucleus	nucleus	nucleus
YJL127C	SPT10	2.68666	Histone H3 acetylase with a role in transcriptional regulation					No	cytoplasm,nucleus	nucleus	nucleus	nucleus
YGR159C	NSR1	2.65982	Nucleolar protein that binds nuclear localization sequences					No	nucleolus	nucleolus	nucleus,nucleolus	nucleus,nucleolus
YMR152W	YIM1	2.62962	Aldehyde reductase involved in detoxification of lignocellulose-derive					Yes	ER	ER	ER	ER
YER058W	PET117	2.6229	Assembly factor that couples heme a synthesis to complex IV assembly					No	N/A	N/A	N/A	N/A
YGR263C	SAY1	2.61955	Sterol deacetylase					Yes	ER	cell periphery,ER,punctate	cell periphery,ER,punctate	below threshold
YLR162W-A	RRT15	2.61284	Putative protein of unknown function					No	N/A	N/A	N/A	N/A
YHR162W	MPC2	2.5927	Highly conserved subunit of the mitochondrial pyruvate carrier (MPC)					No	mitochondrion	mitochondria	mitochondria	mitochondria
YLR250W	SSP120	2.58264	Protein packaged into COPII vesicles for trafficking between ER and Go					No	punctate composite,Golgi,Golgi to ER	punctate,vacuole	punctate,vacuole	punctate
YJR034W	PET191	2.57928	Protein required for assembly of cytochrome c oxidase					No	N/A	mitochondria	missing	mitochondria
YDL194W	SNF3	2.57593	Plasma membrane low glucose sensor, regulates glucose transport					No	N/A	cell periphery	cell periphery,vacuole	below threshold
YDR233C	RTN1	2.5625	Reticulon protein					No	ER,cell periphery	cell periphery,ER,punctate	cell periphery,ER,punctate	cell periphery,ER,punctate
YHR213W	YHR213W	2.5625	Pseudogenic fragment with similarity to flocculins					No	N/A	N/A	N/A	N/A
YLL067C	YLL067C	2.54572	Putative Y' element ATP-dependent helicase					No	N/A	N/A	N/A	N/A
YOR165W	SEY1	2.54237	Dynamin-like GTPase that mediates homotypic ER fusion					No	punctate composite	cytosol,ER,bud	cell periphery,punctate,bud	ER,punctate,bud
YLR274W	MCM5	2.52895	Component of the Mcm2-7 hexameric helicase complex					No	N/A	nucleus	missing	missing
YIL121W	QDR2	2.50546	Plasma membrane transporter of the major facilitator superfamily					No	cell periphery	cell periphery	cell periphery,vacuole	below threshold
YOR279C	RFM1	2.46519	Component of the Sum1p-Rfm1p-Hst1p complex					No	cytoplasm,nucleus	nucleus	nucleus	nucleus
YIL148W	RPL40A	2.45177	Ubiquitin-ribosomal 60S subunit protein L40A fusion protein					No	cytoplasm,nucleus	cytosol	nucleus	cytosol
