# Supplementary material for: Systematic analysis of membrane contact sites in Saccharomyces cerevisiae uncovers modulators of cellular lipid distribution
Source: eLife. 2022 Nov 10;11:e74602. doi: 10.7554/eLife.74602 (PMC9648973; doi:10.7554/eLife.74602)
Supplement: Supplementary file 4. [file elife-74602-supp4.xlsx]

## Sheet: All Data pmol
Feature	Class	Structural category	Functional category	Total length	Total db	Total oh	WT log1	WT log2	WT log3	WT Stat1	WT Stat2	WT Stat3	OE log1	OE log2	OE log3	OE Stat1	OE Stat2	OE Stat3
CDP_DAG 32:0;0	CDP-DAG	GPL	MEM	32	0	0	0.142592	NA	NA	NA	NA	NA	NA	0.178027	NA	NA	NA	NA
CDP_DAG 32:1;0	CDP-DAG	GPL	MEM	32	1	0	0.836261	1.01669	1.07598	0.327082	0.415087	0.287783	1.51943	1.21219	1.76099	0.653768	0.269448	0.293965
CDP_DAG 32:2;0	CDP-DAG	GPL	MEM	32	2	0	0.127935	NA	NA	NA	NA	NA	NA	0.178073	NA	NA	NA	NA
CDP_DAG 34:0;0	CDP-DAG	GPL	MEM	34	0	0	NA	NA	NA	NA	NA	NA	NA	NA	NA	NA	NA	NA
CDP_DAG 34:1;0	CDP-DAG	GPL	MEM	34	1	0	1.58337	1.74923	1.8556	1.46816	1.81607	1.23662	2.46774	2.44437	3.48423	2.84469	1.38091	1.7114
CDP_DAG 34:2;0	CDP-DAG	GPL	MEM	34	2	0	0.336771	0.336115	0.3831	0.167112	0.145552	0.152925	0.517242	0.42987	0.563024	0.324363	0.170497	0.185292
CDP_DAG 36:1;0	CDP-DAG	GPL	MEM	36	1	0	NA	NA	NA	NA	NA	NA	NA	NA	NA	NA	NA	NA
Cer 32:0;2	Cer	SL	MEM	32	0	2	0.281147	0.263139	0.310154	0.176957	0.198952	0.158105	0.365126	0.328385	0.412731	0.175727	0.135632	NA
Cer 32:0;4	Cer	SL	MEM	32	0	4	NA	NA	NA	NA	NA	NA	NA	NA	NA	NA	NA	NA
Cer 32:1;2	Cer	SL	MEM	32	1	2	NA	NA	NA	NA	NA	NA	NA	NA	0.201471	NA	NA	NA
Cer 34:0;2	Cer	SL	MEM	34	0	2	0.790822	0.940061	1.19032	0.35583	0.399359	0.336507	1.46509	0.981673	1.72932	0.326256	0.220125	0.152003
Cer 34:0;3	Cer	SL	MEM	34	0	3	0.135476	0.142914	0.177727	NA	0.0821668	NA	0.155819	0.149389	0.193423	0.0746153	NA	NA
Cer 34:0;4	Cer	SL	MEM	34	0	4	NA	NA	NA	NA	NA	0.0758756	NA	NA	NA	NA	NA	NA
Cer 34:1;3	Cer	SL	MEM	34	1	3	0.130086	0.14373	0.201837	NA	0.147145	NA	0.193989	0.14861	0.180364	0.128216	NA	NA
Cer 36:0;2	Cer	SL	MEM	36	0	2	0.463071	0.539202	0.735815	0.340397	0.434798	0.382669	0.819662	0.587595	0.856575	0.306864	0.190681	0.183631
Cer 36:0;3	Cer	SL	MEM	36	0	3	NA	NA	0.119945	NA	NA	NA	NA	NA	NA	NA	0.0556369	NA
Cer 36:1;2	Cer	SL	MEM	36	1	2	0.867704	0.838009	1.16851	NA	NA	NA	1.25614	0.881098	1.61981	NA	NA	NA
Cer 36:1;3	Cer	SL	MEM	36	1	3	NA	NA	NA	NA	NA	NA	NA	NA	NA	NA	NA	NA
Cer 36:1;4	Cer	SL	MEM	36	1	4	0.390423	0.45172	0.476078	NA	0.080107	NA	0.461436	0.466713	0.658746	NA	NA	NA
Cer 38:0;2	Cer	SL	MEM	38	0	2	0.143222	0.164765	0.197822	0.199392	0.249302	0.228526	0.19136	0.138638	0.207028	0.164378	0.131969	0.110372
Cer 38:0;3	Cer	SL	MEM	38	0	3	NA	NA	NA	NA	NA	NA	NA	NA	NA	NA	NA	NA
Cer 38:0;4	Cer	SL	MEM	38	0	4	NA	NA	NA	NA	NA	NA	NA	NA	NA	NA	NA	0.0448132
Cer 38:1;2	Cer	SL	MEM	38	1	2	0.242364	NA	0.257694	NA	0.260453	NA	0.247173	NA	0.250965	NA	NA	NA
Cer 38:1;4	Cer	SL	MEM	38	1	4	0.155199	0.184713	0.219035	0.0975122	0.135383	0.0953887	0.18047	0.223997	0.270863	0.12324	0.109888	0.0814194
Cer 40:0;2	Cer	SL	MEM	40	0	2	0.40098	0.445329	0.494393	0.145825	0.194104	0.162432	0.470056	0.405617	0.492758	0.16281	0.11269	0.0974411
Cer 40:0;3	Cer	SL	MEM	40	0	3	NA	NA	NA	NA	NA	NA	NA	NA	NA	NA	NA	NA
Cer 40:0;4	Cer	SL	MEM	40	0	4	NA	NA	NA	NA	NA	NA	NA	NA	NA	NA	NA	NA
Cer 40:1;2	Cer	SL	MEM	40	1	2	NA	NA	NA	0.0840917	0.134185	NA	NA	NA	NA	NA	NA	NA
Cer 40:1;5	Cer	SL	MEM	40	1	5	NA	NA	NA	NA	NA	NA	NA	NA	NA	NA	NA	0.174056
Cer 42:0;2	Cer	SL	MEM	42	0	2	2.35886	2.50744	3.03666	1.84773	2.09177	1.84888	3.18212	2.53658	3.11343	2.02611	1.66098	1.20717
Cer 42:0;3	Cer	SL	MEM	42	0	3	0.430972	0.488135	0.486956	0.871363	0.907079	0.878985	0.510537	0.476113	0.582977	0.856324	0.909304	0.522923
Cer 42:0;4	Cer	SL	MEM	42	0	4	0.761784	0.858705	0.89792	0.200828	0.283553	0.226174	0.863315	0.764772	0.87909	0.235953	0.203138	0.148291
Cer 42:1;2	Cer	SL	MEM	42	1	2	NA	NA	NA	NA	NA	NA	NA	NA	NA	NA	NA	NA
Cer 42:1;3	Cer	SL	MEM	42	1	3	NA	NA	NA	NA	0.0952418	NA	NA	NA	NA	NA	NA	NA
Cer 42:1;5	Cer	SL	MEM	42	1	5	NA	NA	NA	NA	NA	NA	NA	NA	NA	NA	NA	0.394944
Cer 44:0;2	Cer	SL	MEM	44	0	2	0.653369	0.779708	0.926483	0.738557	0.758023	0.705202	0.726188	0.824072	0.836264	0.760344	0.67483	0.418936
Cer 44:0;3	Cer	SL	MEM	44	0	3	1.15587	1.37817	1.44454	0.944498	1.07914	0.822518	1.41731	1.40933	1.42611	1.04616	0.837979	0.523391
Cer 44:0;4	Cer	SL	MEM	44	0	4	5.37267	5.80038	6.0884	4.63984	5.31412	4.7025	6.7852	5.95643	6.54894	5.12185	4.32699	2.86869
Cer 44:0;5	Cer	SL	MEM	44	0	5	0.194946	0.183174	0.226734	0.954137	0.993563	0.922762	0.254158	0.191227	0.202116	0.893017	0.973661	0.524964
Cer 44:1;2	Cer	SL	MEM	44	1	2	NA	NA	NA	NA	NA	NA	NA	NA	NA	NA	NA	NA
Cer 44:1;3	Cer	SL	MEM	44	1	3	NA	NA	NA	NA	0.104663	NA	NA	NA	NA	NA	NA	NA
Cer 44:1;4	Cer	SL	MEM	44	1	4	NA	NA	NA	NA	0.103381	NA	NA	0.118319	0.158173	NA	NA	NA
Cer 44:1;5	Cer	SL	MEM	44	1	5	NA	NA	NA	NA	NA	NA	NA	NA	NA	NA	NA	0.236122
Cer 46:0;2	Cer	SL	MEM	46	0	2	NA	NA	NA	NA	NA	NA	NA	NA	NA	NA	NA	NA
Cer 46:0;3	Cer	SL	MEM	46	0	3	NA	0.12475	0.138753	0.503964	0.625448	0.470186	NA	NA	0.173241	0.502568	0.440792	0.250302
Cer 46:0;4	Cer	SL	MEM	46	0	4	0.396075	0.43387	0.504945	1.53389	1.77903	1.51828	0.432788	0.432377	0.427504	1.52663	1.52822	0.927673
Cer 46:1;3	Cer	SL	MEM	46	1	3	NA	NA	NA	NA	NA	NA	NA	NA	NA	NA	NA	NA
CL 56:1;0	CL	GPL	MEM	56	1	0	NA	NA	NA	NA	NA	NA	NA	0.512784	NA	NA	NA	NA
CL 56:2;0	CL	GPL	MEM	56	2	0	NA	NA	NA	NA	NA	NA	NA	NA	NA	NA	NA	NA
CL 56:3;0	CL	GPL	MEM	56	3	0	NA	NA	NA	NA	NA	NA	NA	NA	NA	NA	NA	NA
CL 58:1;0	CL	GPL	MEM	58	1	0	1.03284	1.28651	1.59091	NA	NA	NA	1.29811	1.53633	1.53231	NA	NA	NA
CL 58:2;0	CL	GPL	MEM	58	2	0	1.14957	1.3742	1.47902	NA	NA	NA	NA	1.59793	2.00123	NA	NA	NA
CL 58:3;0	CL	GPL	MEM	58	3	0	NA	NA	0.514068	NA	NA	NA	NA	NA	NA	NA	NA	NA
CL 60:1;0	CL	GPL	MEM	60	1	0	NA	NA	0.986474	NA	NA	NA	NA	1.25835	NA	NA	NA	NA
CL 60:2;0	CL	GPL	MEM	60	2	0	NA	NA	NA	NA	NA	NA	NA	NA	NA	NA	NA	NA
CL 60:3;0	CL	GPL	MEM	60	3	0	NA	NA	NA	NA	NA	NA	NA	NA	NA	NA	NA	NA
CL 62:1;0	CL	GPL	MEM	62	1	0	NA	0.826813	0.657631	NA	NA	NA	NA	0.551229	1.38471	NA	NA	NA
CL 62:3;0	CL	GPL	MEM	62	3	0	1.273	1.59754	1.74125	1.88464	2.08535	1.54848	1.23993	1.77139	1.90887	2.06478	1.70465	1.15886
CL 64:3;0	CL	GPL	MEM	64	3	0	NA	NA	NA	NA	NA	NA	NA	NA	NA	NA	NA	NA
CL 64:4;0	CL	GPL	MEM	64	4	0	NA	NA	NA	NA	NA	NA	NA	NA	NA	NA	NA	NA
CL 66:4;0	CL	GPL	MEM	66	4	0	5.9713	6.66468	6.88968	15.8275	15.7631	12.3743	6.4731	6.53245	8.10732	17.2209	13.7862	9.51594
CL 68:3;0	CL	GPL	MEM	68	3	0	3.16314	3.48863	3.97292	NA	NA	NA	4.26299	4.0652	4.70271	NA	NA	NA
CL 68:4;0	CL	GPL	MEM	68	4	0	8.02618	10.2367	10.9331	30.7433	30.8916	23.4636	10.8987	10.1185	12.0085	32.5053	27.15	18.4552
CL 70:4;0	CL	GPL	MEM	70	4	0	4.98002	5.83245	6.97414	25.487	24.4469	20.3666	4.97461	5.88534	7.10998	25.2544	20.9384	15.4445
CL 72:4;0	CL	GPL	MEM	72	4	0	1.69551	1.76244	2.04957	8.25445	7.49103	6.30909	2.08069	1.94973	2.38468	8.04639	6.96367	4.52046
DAG 10:0;0_16:0;0	DAG	GL	MEM	26	0	0	23.3545	26.6936	27.9576	NA	NA	NA	28.9102	29.7604	35.1919	0.993446	NA	NA
DAG 10:0;0_16:1;0	DAG	GL	MEM	26	1	0	3.22063	3.77169	4.31661	3.52633	NA	NA	4.34346	4.56452	5.1766	NA	NA	NA
DAG 10:0;0_17:0;0	DAG	GL	MEM	27	0	0	NA	NA	NA	NA	NA	NA	NA	NA	NA	NA	NA	NA
DAG 10:0;0_18:0;0	DAG	GL	MEM	28	0	0	6.59525	7.37891	7.89734	0.256304	0.344657	0.283028	7.65572	8.52464	9.84575	0.483271	0.36243	0.215177
DAG 10:0;0_18:1;0	DAG	GL	MEM	28	1	0	1.10097	1.25056	1.24604	0.267997	0.0988744	NA	1.30503	1.50463	1.70486	NA	NA	NA
DAG 10:0;0_20:0;0	DAG	GL	MEM	30	0	0	NA	0.114431	0.122798	NA	NA	NA	0.14145	NA	0.14795	NA	NA	NA
DAG 10:0;0_22:0;0	DAG	GL	MEM	32	0	0	NA	NA	NA	NA	NA	NA	NA	NA	0.0458337	NA	NA	NA
DAG 10:0;0_24:0;0	DAG	GL	MEM	34	0	0	NA	NA	NA	NA	NA	NA	0.187663	NA	NA	NA	NA	NA
DAG 10:1;0_16:0;0	DAG	GL	MEM	26	1	0	0.194722	0.242774	0.291727	NA	NA	NA	0.298694	0.328544	0.381723	NA	NA	NA
DAG 10:1;0_18:0;0	DAG	GL	MEM	28	1	0	0.0478016	NA	NA	NA	NA	NA	0.0817396	NA	0.0525674	NA	NA	NA
DAG 11:0;0_16:0;0	DAG	GL	MEM	27	0	0	NA	NA	NA	NA	NA	NA	NA	NA	NA	NA	NA	NA
DAG 11:0;0_18:0;0	DAG	GL	MEM	29	0	0	NA	NA	NA	NA	NA	NA	NA	NA	NA	NA	NA	NA
DAG 12:0;0_14:0;0	DAG	GL	MEM	26	0	0	2.01335	2.3253	2.34565	NA	NA	NA	2.6203	2.60517	2.97824	0.198352	NA	NA
DAG 12:0;0_14:1;0	DAG	GL	MEM	26	1	0	NA	NA	NA	NA	NA	NA	0.0326075	NA	NA	NA	NA	NA
DAG 12:0;0_15:0;0	DAG	GL	MEM	27	0	0	NA	NA	NA	NA	NA	NA	NA	NA	NA	NA	NA	NA
DAG 12:0;0_16:0;0	DAG	GL	MEM	28	0	0	19.9878	21.8349	23.4115	1.10513	1.39378	1.17621	23.597	25.073	29.4914	1.90749	1.50184	0.969318
DAG 12:0;0_16:1;0	DAG	GL	MEM	28	1	0	5.87249	6.871	7.23718	2.47744	0.97353	0.93121	7.43873	8.35065	9.17262	NA	NA	NA
DAG 12:0;0_17:0;0	DAG	GL	MEM	29	0	0	NA	NA	NA	NA	NA	NA	NA	0.2125	NA	NA	NA	NA
DAG 12:0;0_17:1;0	DAG	GL	MEM	29	1	0	NA	NA	NA	NA	NA	NA	NA	0.167108	NA	NA	NA	NA
DAG 12:0;0_18:0;0	DAG	GL	MEM	30	0	0	4.82364	4.92944	5.58947	0.611925	0.591472	0.690263	5.2586	5.94797	6.76859	0.784438	0.57145	0.477331
DAG 12:0;0_18:1;0	DAG	GL	MEM	30	1	0	1.52731	1.7586	1.93334	7.19753	0.489679	NA	1.87941	2.00931	2.34754	0.511859	0.40272	0.291741
DAG 12:0;0_20:0;0	DAG	GL	MEM	32	0	0	NA	NA	0.107247	NA	NA	NA	0.0385868	0.107397	0.0772271	NA	NA	NA
DAG 12:0;0_22:0;0	DAG	GL	MEM	34	0	0	NA	NA	NA	NA	NA	NA	NA	NA	NA	NA	NA	NA
DAG 12:0;0_24:0;0	DAG	GL	MEM	36	0	0	NA	NA	NA	NA	NA	NA	NA	2.33884	NA	NA	NA	NA
DAG 12:1;0_14:0;0	DAG	GL	MEM	26	1	0	NA	NA	NA	NA	NA	NA	NA	NA	NA	NA	NA	NA
DAG 12:1;0_16:0;0	DAG	GL	MEM	28	1	0	NA	NA	NA	NA	NA	NA	0.0552163	NA	NA	NA	NA	NA
DAG 12:1;0_16:1;0	DAG	GL	MEM	28	2	0	NA	NA	NA	NA	NA	NA	NA	NA	NA	NA	NA	NA
DAG 12:1;0_18:0;0	DAG	GL	MEM	30	1	0	NA	NA	NA	NA	NA	NA	NA	NA	NA	NA	NA	NA
DAG 12:1;0_18:1;0	DAG	GL	MEM	30	2	0	NA	NA	NA	NA	NA	NA	NA	NA	NA	NA	NA	NA
DAG 13:0;0_15:0;0	DAG	GL	MEM	28	0	0	NA	NA	NA	NA	NA	NA	NA	0.054214	NA	NA	NA	NA
DAG 13:0;0_16:0;0	DAG	GL	MEM	29	0	0	NA	NA	NA	NA	NA	NA	NA	0.439954	NA	NA	NA	NA
DAG 13:0;0_16:1;0	DAG	GL	MEM	29	1	0	NA	NA	NA	NA	NA	NA	NA	0.172064	NA	NA	NA	NA
DAG 13:0;0_18:0;0	DAG	GL	MEM	31	0	0	NA	NA	NA	NA	NA	NA	NA	NA	NA	NA	NA	NA
DAG 13:1;0_16:0;0	DAG	GL	MEM	29	1	0	NA	NA	NA	NA	NA	NA	NA	NA	NA	NA	NA	NA
DAG 14:0;0_14:0;0	DAG	GL	MEM	28	0	0	1.02062	1.0917	1.17846	NA	NA	NA	1.25073	1.41785	1.45311	NA	NA	NA
DAG 14:0;0_14:1;0	DAG	GL	MEM	28	1	0	0.404106	0.429232	0.449716	NA	NA	NA	0.506572	0.599605	0.639111	NA	NA	NA
DAG 14:0;0_15:0;0	DAG	GL	MEM	29	0	0	NA	NA	NA	NA	NA	NA	NA	1.01774	NA	NA	NA	NA
DAG 14:0;0_15:1;0	DAG	GL	MEM	29	1	0	NA	NA	NA	NA	NA	NA	NA	0.586075	NA	NA	NA	NA
DAG 14:0;0_16:0;0	DAG	GL	MEM	30	0	0	7.49054	7.49082	8.36286	NA	NA	NA	8.73738	9.76103	10.5584	NA	NA	NA
DAG 14:0;0_16:1;0	DAG	GL	MEM	30	1	0	13.2257	14.3977	15.5323	33.8957	2.11699	1.79484	15.9377	16.6187	19.6581	2.18824	1.63817	1.36626
DAG 14:0;0_17:0;0	DAG	GL	MEM	31	0	0	NA	NA	NA	NA	NA	NA	NA	0.388839	NA	NA	NA	NA
DAG 14:0;0_17:1;0	DAG	GL	MEM	31	1	0	NA	NA	NA	NA	NA	NA	NA	0.165494	NA	NA	NA	NA
DAG 14:0;0_18:0;0	DAG	GL	MEM	32	0	0	1.20129	1.21157	1.36796	NA	NA	NA	1.35398	1.64463	1.5992	NA	NA	0.137368
DAG 14:0;0_18:1;0	DAG	GL	MEM	32	1	0	12.4612	13.6338	14.4567	2.39799	2.67884	2.21494	14.5825	14.9563	18.5076	3.08023	2.45695	1.85104
DAG 14:0;0_20:0;0	DAG	GL	MEM	34	0	0	NA	NA	NA	NA	NA	NA	NA	NA	NA	NA	NA	NA
DAG 14:0;0_22:0;0	DAG	GL	MEM	36	0	0	NA	NA	NA	NA	NA	NA	NA	NA	NA	NA	NA	NA
DAG 14:0;0_24:0;0	DAG	GL	MEM	38	0	0	NA	NA	NA	NA	NA	NA	NA	NA	NA	NA	NA	NA
DAG 14:1;0_14:1;0	DAG	GL	MEM	28	2	0	NA	NA	NA	NA	NA	NA	NA	NA	NA	NA	NA	NA
DAG 14:1;0_15:0;0	DAG	GL	MEM	29	1	0	NA	NA	NA	NA	NA	NA	NA	NA	NA	NA	NA	NA
DAG 14:1;0_16:0;0	DAG	GL	MEM	30	1	0	3.3305	3.61601	3.94619	7.91088	0.473354	0.443196	3.90225	4.34145	4.95708	0.641406	0.437675	0.375784
DAG 14:1;0_16:1;0	DAG	GL	MEM	30	2	0	1.74797	1.97482	1.78976	1.66438	NA	NA	2.14796	2.78968	2.41256	NA	NA	NA
DAG 14:1;0_18:0;0	DAG	GL	MEM	32	1	0	1.06828	0.965445	1.13205	NA	NA	NA	1.1067	1.04996	1.28985	NA	0.0694108	NA
DAG 14:1;0_18:1;0	DAG	GL	MEM	32	2	0	NA	NA	0.430217	NA	NA	NA	NA	NA	NA	0.157177	NA	NA
DAG 15:0;0_15:0;0	DAG	GL	MEM	30	0	0	NA	NA	NA	NA	NA	NA	NA	0.223159	NA	NA	NA	NA
DAG 15:0;0_16:0;0	DAG	GL	MEM	31	0	0	NA	NA	NA	NA	NA	NA	NA	NA	NA	NA	NA	NA
DAG 15:0;0_16:1;0	DAG	GL	MEM	31	1	0	0.691074	0.732183	0.821069	1.73128	NA	NA	1.07143	1.50204	1.10483	0.863649	0.724131	0.529023
DAG 15:0;0_17:0;0	DAG	GL	MEM	32	0	0	NA	NA	NA	NA	NA	NA	NA	0.104763	NA	NA	NA	NA
DAG 15:0;0_18:0;0	DAG	GL	MEM	33	0	0	NA	NA	NA	NA	NA	NA	NA	0.472543	NA	NA	NA	NA
DAG 15:0;0_18:1;0	DAG	GL	MEM	33	1	0	0.677923	0.63373	0.531641	1.69664	1.21848	0.76696	0.676877	1.19944	0.667617	1.44028	1.16017	0.864704
DAG 15:1;0_16:0;0	DAG	GL	MEM	31	1	0	0.386609	0.45375	0.534373	0.394049	0.436469	NA	0.586785	0.765506	0.61721	0.232215	0.176382	0.122505
DAG 15:1;0_18:0;0	DAG	GL	MEM	33	1	0	NA	NA	NA	NA	NA	NA	NA	NA	0.0940238	NA	NA	NA
DAG 16:0;0_16:0;0	DAG	GL	MEM	32	0	0	5.52764	5.59149	6.24785	NA	NA	NA	5.88182	6.74568	6.79077	2.86009	NA	NA
DAG 16:0;0_16:1;0	DAG	GL	MEM	32	1	0	101.052	112.502	120.229	31.6682	36.3714	29.5803	118.065	121.845	150.721	39.0626	32.1219	23.1851
DAG 16:0;0_16:2;0	DAG	GL	MEM	32	2	0	NA	NA	NA	NA	NA	NA	NA	NA	NA	NA	NA	NA
DAG 16:0;0_17:0;0	DAG	GL	MEM	33	0	0	NA	NA	NA	NA	NA	NA	NA	1.25869	NA	NA	NA	NA
DAG 16:0;0_17:1;0	DAG	GL	MEM	33	1	0	0.35134	0.358411	0.272135	0.429241	0.285162	0.213137	0.419347	0.736005	0.395935	0.365949	0.275112	0.232275
DAG 16:0;0_18:0;0	DAG	GL	MEM	34	0	0	NA	NA	NA	NA	NA	NA	NA	NA	NA	NA	NA	NA
DAG 16:0;0_18:1;0	DAG	GL	MEM	34	1	0	99.1804	109.001	116.423	61.8382	73.5613	57.6093	112.8	115.221	146.071	77.4877	65.6874	43.6712
DAG 16:0;0_18:2;0	DAG	GL	MEM	34	2	0	NA	NA	NA	NA	NA	NA	NA	NA	NA	NA	NA	NA
DAG 16:0;0_18:3;0	DAG	GL	MEM	34	3	0	NA	NA	NA	NA	NA	NA	NA	NA	NA	NA	NA	NA
DAG 16:0;0_19:1;0	DAG	GL	MEM	35	1	0	NA	NA	NA	NA	NA	NA	NA	NA	NA	NA	NA	NA
DAG 16:0;0_20:0;0	DAG	GL	MEM	36	0	0	NA	NA	NA	NA	NA	NA	NA	NA	NA	NA	NA	NA
DAG 16:0;0_22:0;0	DAG	GL	MEM	38	0	0	NA	NA	NA	NA	NA	NA	NA	NA	NA	NA	NA	NA
DAG 16:0;0_24:0;0	DAG	GL	MEM	40	0	0	NA	NA	NA	NA	NA	NA	NA	1.23343	1.55819	NA	NA	NA
DAG 16:1;0_16:1;0	DAG	GL	MEM	32	2	0	94.5888	108.806	117.066	37.6648	45.1998	37.0015	111.363	112.749	139.386	45.7833	41.8071	28.1949
DAG 16:1;0_17:0;0	DAG	GL	MEM	33	1	0	0.579353	0.476927	0.384048	0.81447	0.557126	0.447132	0.487458	1.05712	0.473504	0.590157	0.594203	0.470461
DAG 16:1;0_18:0;0	DAG	GL	MEM	34	1	0	32.273	36.0763	37.9559	11.5946	13.0174	10.1473	35.149	35.252	44.9997	12.7523	10.5711	7.43808
DAG 16:1;0_18:1;0	DAG	GL	MEM	34	2	0	95.9278	106.894	118.565	85.4491	107.582	86.409	106.937	109.848	134.949	105.863	97.1337	63.18
DAG 16:1;0_18:2;0	DAG	GL	MEM	34	3	0	NA	NA	NA	NA	NA	NA	NA	NA	NA	NA	NA	NA
DAG 16:1;0_20:0;0	DAG	GL	MEM	36	1	0	0.81147	0.756694	0.712377	NA	NA	NA	NA	NA	0.9986	NA	NA	NA
DAG 16:1;0_22:0;0	DAG	GL	MEM	38	1	0	NA	NA	NA	NA	NA	NA	NA	NA	NA	NA	NA	NA
DAG 16:1;0_24:0;0	DAG	GL	MEM	40	1	0	1.08505	0.874329	1.5764	NA	NA	NA	1.69464	3.8894	1.03116	NA	NA	NA
DAG 17:0;0_18:0;0	DAG	GL	MEM	35	0	0	NA	NA	NA	NA	NA	NA	NA	0.864832	NA	NA	NA	NA
DAG 17:0;0_18:1;0	DAG	GL	MEM	35	1	0	NA	NA	NA	2.4931	1.54367	NA	0.695723	1.61306	NA	1.25799	1.01317	0.958819
DAG 17:1;0_18:0;0	DAG	GL	MEM	35	1	0	NA	NA	NA	NA	NA	NA	0.36146	NA	NA	NA	NA	NA
DAG 17:1;0_18:1;0	DAG	GL	MEM	35	2	0	NA	NA	NA	1.16478	NA	NA	NA	1.10245	NA	NA	NA	NA
DAG 18:0;0_18:1;0	DAG	GL	MEM	36	1	0	36.2242	40.4043	42.6983	23.4298	28.6011	20.6193	40.0186	41.9769	51.4294	25.0872	20.9913	17.614
DAG 18:0;0_18:2;0	DAG	GL	MEM	36	2	0	NA	NA	NA	NA	NA	NA	NA	NA	NA	NA	NA	NA
DAG 18:0;0_20:0;0	DAG	GL	MEM	38	0	0	NA	NA	NA	NA	NA	NA	NA	NA	NA	NA	NA	NA
DAG 18:0;0_22:0;0	DAG	GL	MEM	40	0	0	NA	NA	NA	NA	NA	NA	NA	NA	NA	NA	NA	NA
DAG 18:0;0_24:0;0	DAG	GL	MEM	42	0	0	NA	NA	NA	NA	NA	NA	NA	NA	NA	NA	NA	NA
DAG 18:1;0_18:1;0	DAG	GL	MEM	36	2	0	8.91745	9.65921	10.7145	12.4367	15.8444	11.8828	10.3595	10.4495	12.4407	13.898	12.5607	8.45402
DAG 18:1;0_20:0;0	DAG	GL	MEM	38	1	0	2.82022	2.3862	2.06707	NA	NA	NA	2.51166	NA	2.65897	NA	NA	NA
DAG 18:1;0_22:0;0	DAG	GL	MEM	40	1	0	0.729656	0.621427	NA	NA	NA	NA	NA	NA	0.755763	NA	NA	NA
DAG 18:1;0_24:0;0	DAG	GL	MEM	42	1	0	1.62388	1.39141	1.41461	NA	NA	NA	1.50017	1.62978	2.38634	1.20823	NA	NA
EE 14:0;0	EE	STE	STO	14	0	0	0	3.40808	3.60885	0	0	0	3.37252	3.00501	4.13348	0	0	0
EE 16:0;0	EE	STE	STO	16	0	0	48.0948	54.2297	57.6617	102.178	115.819	91.1011	63.9087	69.2995	81.6434	120.675	112.39	71.3629
EE 16:1;0	EE	STE	STO	16	1	0	51.4414	61.5602	61.9129	162.888	190.118	149.502	66.0496	70.7012	87.1705	199.482	197.008	123.757
EE 17:0;0	EE	STE	STO	17	0	0	0	0	0	0	0	0	0	0	0	59.008	53.2396	0
EE 18:0;0	EE	STE	STO	18	0	0	0	0	0	0	0	0	0	0	0	0	209.262	0
EE 18:1;0	EE	STE	STO	18	1	0	18.4932	24.1456	25.4927	134.514	160.453	121.126	26.8123	27.3873	33.4211	157.845	159.315	101.121
EE 19:0;0	EE	STE	STO	19	0	0	0	0	0	0	31.825	0	0	0	0	0	0	0
Erg	Erg	ST	MEM	28	3	0	1189.45	1301.77	1393.99	713.486	842.906	684.133	1455.1	1488.7	1737.11	786.558	655.274	458.995
IPC 38:0;2	IPC	SL	MEM	38	0	2	NA	NA	NA	NA	NA	NA	NA	NA	NA	NA	NA	NA
IPC 38:0;3	IPC	SL	MEM	38	0	3	NA	1.0923	1.38992	NA	NA	NA	NA	1.20255	1.57628	NA	NA	NA
IPC 38:0;4	IPC	SL	MEM	38	0	4	1.61795	1.32803	2.08485	NA	NA	NA	NA	1.10226	1.16312	NA	NA	NA
IPC 38:1;2	IPC	SL	MEM	38	1	2	7.39537	5.59087	8.68358	10.6575	14.6857	10.0241	7.73733	4.34112	9.40556	16.4594	12.8349	7.65592
IPC 40:0;2	IPC	SL	MEM	40	0	2	NA	NA	NA	NA	NA	NA	NA	NA	NA	NA	NA	NA
IPC 40:0;3	IPC	SL	MEM	40	0	3	NA	NA	NA	NA	NA	NA	NA	NA	NA	NA	NA	NA
IPC 40:0;4	IPC	SL	MEM	40	0	4	1.4031	NA	1.61509	NA	NA	NA	NA	0.826942	NA	NA	NA	NA
IPC 40:1;2	IPC	SL	MEM	40	1	2	NA	NA	NA	2.80297	3.956	2.76747	NA	NA	NA	3.87757	3.01648	1.75187
IPC 40:1;4	IPC	SL	MEM	40	1	4	NA	NA	NA	NA	NA	NA	NA	NA	NA	NA	NA	NA
IPC 42:0;3	IPC	SL	MEM	42	0	3	11.6548	8.25948	12.5899	NA	NA	NA	10.5246	8.27676	9.63586	NA	NA	NA
IPC 42:0;4	IPC	SL	MEM	42	0	4	44.269	34.9727	53.4973	2.79671	3.33177	2.65925	35.7343	30.7312	40.3727	3.49607	2.71369	2.22745
IPC 42:0;5	IPC	SL	MEM	42	0	5	1.37431	NA	1.57869	0.697875	0.836673	0.73324	1.4284	1.03959	1.27676	0.825015	0.834808	0.375598
IPC 44:0;3	IPC	SL	MEM	44	0	3	79.2986	57.6106	84.3501	10.3871	12.1188	9.49035	72.2554	58.6997	70.2842	11.81	8.29592	6.73837
IPC 44:0;4	IPC	SL	MEM	44	0	4	344.602	265.183	415.747	63.176	73.5827	59.5884	289.47	244.184	317.566	76.5759	61.3664	47.8567
IPC 44:0;5	IPC	SL	MEM	44	0	5	49.1529	37.6047	59.0803	43.8874	48.4486	40.6888	42.9027	36.6851	49.2431	49.9581	52.0343	31.8369
IPC 44:1;3	IPC	SL	MEM	44	1	3	NA	NA	NA	NA	NA	NA	NA	NA	NA	NA	NA	NA
IPC 44:1;4	IPC	SL	MEM	44	1	4	NA	NA	NA	NA	NA	NA	NA	NA	NA	NA	NA	NA
IPC 46:0;3	IPC	SL	MEM	46	0	3	1.86756	1.24773	2.46106	2.904	3.25271	2.68621	NA	1.12222	1.69791	2.90201	2.5006	1.50281
IPC 46:0;4	IPC	SL	MEM	46	0	4	13.9859	11.3152	17.3891	28.5797	32.475	27.9444	10.4054	8.83268	12.4205	30.8118	29.3399	20.4256
IPC 46:0;5	IPC	SL	MEM	46	0	5	NA	NA	NA	0.858877	1.02753	0.954352	NA	NA	NA	0.920866	1.18321	0.655308
LPA 16:0;0	LPA	GPL	LYS	16	0	0	4.31519	5.02876	5.70856	3.45504	3.86518	3.06954	4.62177	4.80635	6.03588	2.81251	2.28918	1.72826
LPA 16:1;0	LPA	GPL	LYS	16	1	0	8.94879	9.75671	11.4746	3.8057	4.34675	3.85727	8.66462	9.56139	11.6945	3.78968	3.12844	2.38543
LPA 18:0;0	LPA	GPL	LYS	18	0	0	0.367084	0.357766	0.463405	0.565898	0.691953	0.486972	0.316922	0.334987	0.433287	0.435958	0.371451	0.250702
LPA 18:1;0	LPA	GPL	LYS	18	1	0	10.4561	11.3481	12.5752	9.29273	10.0573	8.52113	10.001	10.8237	13.3241	8.08666	6.7727	5.14605
LPA 18:2;0	LPA	GPL	LYS	18	2	0	0.762512	0.677153	0.834891	0.237555	0.230178	0.191813	0.627298	0.70174	0.806252	0.25644	0.188685	0.128003
LPA 20:0;0	LPA	GPL	LYS	20	0	0	NA	NA	NA	NA	NA	NA	NA	NA	NA	NA	NA	NA
LPA 20:2;0	LPA	GPL	LYS	20	2	0	0.535114	0.464496	0.559832	0.231274	0.261702	0.164366	0.381931	0.413548	0.457513	0.246018	0.182974	0.104549
LPC 10:0;0	LPC	GPL	LYS	10	0	0	NA	NA	NA	NA	NA	NA	NA	NA	NA	NA	NA	NA
LPC 14:0;0	LPC	GPL	LYS	14	0	0	6.23398	5.74717	6.93514	1.10494	1.25371	1.01645	5.39268	5.55357	5.89687	1.17096	0.933048	0.750523
LPC 14:1;0	LPC	GPL	LYS	14	1	0	2.82951	2.42777	3.15198	NA	NA	NA	2.32414	2.47428	2.53567	NA	NA	NA
LPC 16:0;0	LPC	GPL	LYS	16	0	0	27.1136	29.411	34.6057	36.5708	41.6898	32.1019	28.8191	26.8291	31.8001	39.188	29.9042	24.446
LPC 16:1;0	LPC	GPL	LYS	16	1	0	143.774	136.034	155.297	55.7279	66.5361	56.5723	136.922	140.153	148.054	60.7071	49.2379	37.4916
LPC 16:2;0	LPC	GPL	LYS	16	2	0	1.44678	1.46642	1.69137	NA	NA	NA	1.84658	1.61788	2.04443	NA	NA	NA
LPC 18:0;0	LPC	GPL	LYS	18	0	0	4.92375	5.30827	6.88408	13.3761	14.9093	10.8676	5.12844	4.73351	5.39825	13.6033	10.0347	8.77208
LPC 18:1;0	LPC	GPL	LYS	18	1	0	155.879	149.336	168.809	91.7186	106.44	82.127	138.387	141.352	152.519	85.5085	69.5745	55.7184
LPC 20:1;0	LPC	GPL	LYS	20	1	0	NA	NA	NA	NA	NA	NA	NA	NA	NA	NA	NA	NA
LPE 14:0;0	LPE	GPL	LYS	14	0	0	2.83133	2.68566	2.51606	NA	NA	NA	2.57278	2.48004	2.84996	NA	NA	NA
LPE 16:0;0	LPE	GPL	LYS	16	0	0	14.7065	14.6306	15.5291	3.74889	3.34596	2.49428	16.1122	15.1101	18.3062	3.7888	2.78792	1.76902
LPE 16:1;0	LPE	GPL	LYS	16	1	0	43.5632	40.1632	39.4095	6.40354	5.52606	4.21477	44.7023	41.0683	51.3178	7.83107	5.15856	3.37946
LPE 18:0;0	LPE	GPL	LYS	18	0	0	3.76082	4.09177	4.53533	1.11935	1.28627	0.878564	4.55524	3.84406	5.00584	1.21367	0.960597	0.541702
LPE 18:1;0	LPE	GPL	LYS	18	1	0	80.7805	77.8992	73.8688	15.4627	14.3624	9.96701	78.4687	72.9487	91.2045	14.4411	10.2309	7.7545
LPE 20:0;0	LPE	GPL	LYS	20	0	0	0.368006	0.360249	0.397615	0.320798	0.40766	0.246832	0.399089	0.374885	0.403357	0.324694	0.255871	0.187502
LPE 20:1;0	LPE	GPL	LYS	20	1	0	13.8989	14.6916	15.4183	1.84468	2.33693	1.66779	14.5731	12.9725	16.6488	1.76248	1.60123	0.995797
LPI 10:0;0	LPI	GPL	LYS	10	0	0	2.48334	2.48205	2.65428	NA	NA	NA	2.88105	2.5977	3.9208	NA	NA	NA
LPI 12:0;0	LPI	GPL	LYS	12	0	0	2.40916	2.4883	2.55177	0.160485	0.162612	0.145763	2.68155	2.61302	3.5135	0.179182	0.159335	NA
LPI 12:1;0	LPI	GPL	LYS	12	1	0	NA	NA	NA	NA	NA	NA	NA	NA	NA	NA	NA	NA
LPI 14:0;0	LPI	GPL	LYS	14	0	0	2.36655	2.12958	2.12455	NA	NA	NA	2.2593	2.10761	2.67017	NA	NA	NA
LPI 14:1;0	LPI	GPL	LYS	14	1	0	1.36129	1.3338	1.33963	NA	NA	NA	1.53195	1.3539	1.67941	NA	NA	NA
LPI 16:0;0	LPI	GPL	LYS	16	0	0	39.6022	41.7024	43.3412	7.57722	8.14136	6.10592	43.4994	43.4181	51.6209	7.69373	5.79801	4.47817
LPI 16:1;0	LPI	GPL	LYS	16	1	0	48.2919	47.679	48.8473	11.1356	13.0799	9.91951	51.7374	48.9278	62.3032	13.4712	10.4339	7.37323
LPI 18:0;0	LPI	GPL	LYS	18	0	0	15.0697	16.0649	17.1493	3.85698	4.08026	2.86149	17.0696	17.9604	20.2993	3.25031	2.67954	1.93657
LPI 18:1;0	LPI	GPL	LYS	18	1	0	59.5379	60.0861	61.8251	35.3176	40.9018	29.9109	61.1403	59.8197	74.4813	38.5253	30.9454	22.7313
LPI 20:0;0	LPI	GPL	LYS	20	0	0	NA	NA	NA	NA	NA	NA	NA	NA	NA	NA	NA	NA
LPS 10:0;0	LPS	GPL	LYS	10	0	0	NA	NA	NA	NA	NA	NA	NA	NA	NA	NA	NA	NA
LPS 12:0;0	LPS	GPL	LYS	12	0	0	NA	NA	NA	NA	NA	NA	NA	NA	NA	NA	NA	NA
LPS 14:0;0	LPS	GPL	LYS	14	0	0	NA	NA	NA	NA	NA	NA	0.124525	NA	NA	NA	NA	NA
LPS 16:0;0	LPS	GPL	LYS	16	0	0	1.91656	2.62519	1.19829	2.16799	1.6211	0.857318	3.65509	2.37331	3.97751	1.21976	0.627284	0.658691
LPS 16:1;0	LPS	GPL	LYS	16	1	0	0.893151	0.78481	0.583425	0.281871	0.212293	0.13846	1.3308	0.969218	1.33387	0.28463	0.171777	0.149164
LPS 18:0;0	LPS	GPL	LYS	18	0	0	NA	NA	NA	0.119716	NA	NA	NA	NA	NA	NA	NA	NA
LPS 18:1;0	LPS	GPL	LYS	18	1	0	NA	NA	NA	NA	NA	NA	NA	NA	NA	NA	NA	NA
LPS 20:1;0	LPS	GPL	LYS	20	1	0	0.229048	0.189521	0.17692	NA	NA	NA	0.167694	0.195503	0.203796	NA	NA	NA
M(IP)2C 42:0;3	M(IP)2C	SL	MEM	42	0	3	NA	NA	1.18422	NA	NA	NA	NA	NA	NA	NA	NA	NA
M(IP)2C 42:0;4	M(IP)2C	SL	MEM	42	0	4	NA	NA	NA	0.628754	NA	0.557625	NA	NA	NA	NA	NA	NA
M(IP)2C 44:0;3	M(IP)2C	SL	MEM	44	0	3	35.8537	42.2329	47.4197	7.54136	6.61275	5.78568	34.6293	43.9404	41.3666	7.09009	4.68197	3.95896
M(IP)2C 44:0;4	M(IP)2C	SL	MEM	44	0	4	124.581	149.514	173.856	99.1484	104.326	84.6939	123.214	153.982	157.246	88.4613	64.5873	49.8375
M(IP)2C 44:0;5	M(IP)2C	SL	MEM	44	0	5	0.987306	NA	1.69559	4.06855	3.88008	3.27918	NA	1.43885	NA	3.59116	2.62038	1.50972
M(IP)2C 46:0;3	M(IP)2C	SL	MEM	46	0	3	4.12904	4.85262	5.6263	5.35272	5.00392	4.17171	2.6795	3.96727	3.50139	4.65396	3.04196	2.30309
M(IP)2C 46:0;4	M(IP)2C	SL	MEM	46	0	4	17.8137	22.4488	23.5783	68.3135	70.4389	61.4591	15.6741	20.0339	20.3946	53.8971	43.7991	35.292
MIPC 42:0;3	MIPC	SL	MEM	42	0	3	2.08427	2.37714	2.31707	NA	NA	NA	2.89448	2.6455	2.86434	NA	NA	NA
MIPC 42:0;4	MIPC	SL	MEM	42	0	4	NA	NA	NA	NA	NA	NA	NA	NA	NA	NA	NA	NA
MIPC 44:0;3	MIPC	SL	MEM	44	0	3	11.4201	12.7927	12.526	2.14737	2.61712	1.99396	15.2518	14.4978	15.9722	2.84564	2.39828	1.48838
MIPC 44:0;4	MIPC	SL	MEM	44	0	4	57.5577	61.8294	66.401	28.9147	32.8632	25.1103	75.1444	72.4652	84.1632	37.4545	27.291	19.9979
MIPC 44:0;5	MIPC	SL	MEM	44	0	5	2.32714	2.65801	2.35431	5.5508	6.41787	5.07768	2.72665	2.51232	3.40101	5.98384	5.24838	3.44057
MIPC 46:0;3	MIPC	SL	MEM	46	0	3	NA	NA	NA	1.26331	1.17478	1.09069	NA	NA	NA	1.38897	0.990657	0.667147
MIPC 46:0;4	MIPC	SL	MEM	46	0	4	5.20746	6.18845	6.10331	17.6927	20.9661	16.1456	6.22333	6.15705	6.93038	20.8378	15.8227	11.3324
PA 10:0;0_14:0;0	PA	GPL	MEM	24	0	0	1.84776	2.04313	1.99601	NA	NA	NA	2.52919	2.40195	2.92441	NA	NA	NA
PA 10:0;0_14:1;0	PA	GPL	MEM	24	1	0	NA	NA	NA	NA	NA	NA	NA	NA	NA	NA	NA	NA
PA 10:0;0_15:0;0	PA	GPL	MEM	25	0	0	NA	NA	NA	NA	NA	NA	NA	NA	NA	NA	NA	NA
PA 10:0;0_16:0;0	PA	GPL	MEM	26	0	0	23.1972	29.2972	28.8745	NA	NA	NA	35.6682	31.2125	39.5856	NA	NA	NA
PA 10:0;0_16:1;0	PA	GPL	MEM	26	1	0	7.97617	10.2711	9.57874	NA	NA	NA	10.0564	10.2992	12.3913	NA	NA	NA
PA 10:0;0_17:0;0	PA	GPL	MEM	27	0	0	NA	NA	NA	NA	NA	NA	NA	NA	NA	NA	NA	NA
PA 10:0;0_17:1;0	PA	GPL	MEM	27	1	0	NA	NA	NA	NA	NA	NA	NA	NA	NA	NA	NA	NA
PA 10:0;0_18:0;0	PA	GPL	MEM	28	0	0	4.61197	5.06575	5.32616	NA	NA	NA	5.11133	4.82987	5.38817	NA	NA	NA
PA 10:0;0_18:1;0	PA	GPL	MEM	28	1	0	3.717	4.08747	4.65407	NA	NA	NA	4.25371	3.56965	4.68398	NA	NA	NA
PA 10:0;0_18:2;0	PA	GPL	MEM	28	2	0	NA	NA	NA	NA	NA	NA	NA	NA	NA	NA	NA	NA
PA 10:0;0_20:0;0	PA	GPL	MEM	30	0	0	0.00308873	0.00783865	0.00661765	NA	NA	NA	0.00713158	0.00457959	0.010553	NA	NA	NA
PA 10:0;0_20:1;0	PA	GPL	MEM	30	1	0	NA	NA	NA	NA	NA	NA	NA	NA	NA	NA	NA	NA
PA 10:0;0_22:0;0	PA	GPL	MEM	32	0	0	NA	NA	NA	NA	NA	NA	NA	NA	NA	NA	NA	NA
PA 10:0;0_22:1;0	PA	GPL	MEM	32	1	0	NA	NA	NA	0.118832	0.135071	NA	NA	NA	NA	NA	0.0895925	0.0807813
PA 10:0;0_24:0;0	PA	GPL	MEM	34	0	0	NA	NA	NA	NA	NA	NA	NA	NA	NA	NA	NA	NA
PA 10:1;0_14:0;0	PA	GPL	MEM	24	1	0	NA	NA	NA	NA	NA	NA	NA	NA	NA	NA	NA	NA
PA 10:1;0_16:0;0	PA	GPL	MEM	26	1	0	0.906836	NA	1.26974	NA	NA	NA	1.32261	NA	1.61855	NA	NA	NA
PA 10:1;0_16:1;0	PA	GPL	MEM	26	2	0	NA	NA	NA	NA	NA	NA	NA	NA	NA	NA	NA	NA
PA 10:1;0_18:0;0	PA	GPL	MEM	28	1	0	NA	NA	NA	NA	NA	NA	NA	NA	NA	NA	NA	NA
PA 10:1;0_18:1;0	PA	GPL	MEM	28	2	0	NA	NA	NA	NA	NA	NA	NA	NA	NA	NA	NA	NA
PA 11:0;0_14:0;0	PA	GPL	MEM	25	0	0	NA	NA	NA	NA	NA	NA	NA	NA	NA	NA	NA	NA
PA 11:0;0_16:0;0	PA	GPL	MEM	27	0	0	NA	NA	NA	NA	NA	NA	NA	NA	NA	NA	NA	NA
PA 11:0;0_16:1;0	PA	GPL	MEM	27	1	0	NA	NA	NA	NA	NA	NA	NA	NA	NA	NA	NA	NA
PA 11:0;0_18:1;0	PA	GPL	MEM	29	1	0	NA	NA	NA	NA	NA	NA	NA	NA	NA	NA	NA	NA
PA 12:0;0_12:0;0	PA	GPL	MEM	24	0	0	0.0813189	0.0943381	0.101692	NA	NA	NA	0.108159	0.094829	0.113051	NA	NA	NA
PA 12:0;0_12:1;0	PA	GPL	MEM	24	1	0	NA	NA	NA	NA	NA	NA	NA	NA	NA	NA	NA	NA
PA 12:0;0_14:0;0	PA	GPL	MEM	26	0	0	1.1387	1.38666	1.30813	NA	NA	NA	1.73151	1.55544	2.13918	NA	NA	NA
PA 12:0;0_14:1;0	PA	GPL	MEM	26	1	0	NA	NA	NA	NA	NA	NA	NA	0.067307	NA	NA	NA	NA
PA 12:0;0_15:0;0	PA	GPL	MEM	27	0	0	NA	NA	NA	NA	NA	NA	NA	NA	NA	NA	NA	NA
PA 12:0;0_16:0;0	PA	GPL	MEM	28	0	0	10.618	12.8282	13.6216	0.579082	0.848258	0.70304	16.1433	15.6704	19.575	0.627967	0.623915	0.414784
PA 12:0;0_16:1;0	PA	GPL	MEM	28	1	0	14.6156	18.4513	19.1801	0.684996	0.98343	0.847942	20.4274	18.4418	24.6624	0.806113	0.813234	0.403143
PA 12:0;0_17:0;0	PA	GPL	MEM	29	0	0	NA	NA	NA	NA	NA	NA	NA	NA	NA	NA	NA	NA
PA 12:0;0_17:1;0	PA	GPL	MEM	29	1	0	NA	NA	NA	NA	NA	NA	NA	NA	NA	NA	NA	NA
PA 12:0;0_18:0;0	PA	GPL	MEM	30	0	0	0.0158986	0.0303166	0.0220173	NA	NA	NA	0.0430579	0.0228852	0.0586698	NA	NA	NA
PA 12:0;0_18:1;0	PA	GPL	MEM	30	1	0	2.37537	2.85753	3.16067	0.39463	0.578361	0.416737	2.86159	2.85677	3.50447	0.601415	0.430926	0.342974
PA 12:0;0_18:2;0	PA	GPL	MEM	30	2	0	NA	NA	NA	NA	NA	NA	NA	NA	NA	NA	NA	NA
PA 12:0;0_20:0;0	PA	GPL	MEM	32	0	0	NA	NA	NA	NA	NA	NA	NA	NA	NA	NA	NA	NA
PA 12:0;0_22:0;0	PA	GPL	MEM	34	0	0	NA	NA	NA	NA	NA	NA	NA	NA	NA	NA	NA	NA
PA 12:0;0_24:0;0	PA	GPL	MEM	36	0	0	NA	NA	NA	NA	NA	NA	NA	NA	NA	NA	NA	NA
PA 12:0;0_26:0;0	PA	GPL	MEM	38	0	0	NA	NA	NA	NA	NA	NA	NA	NA	NA	NA	NA	NA
PA 12:1;0_14:0;0	PA	GPL	MEM	26	1	0	NA	NA	NA	NA	NA	NA	NA	NA	NA	NA	NA	NA
PA 12:1;0_15:0;0	PA	GPL	MEM	27	1	0	NA	NA	NA	NA	NA	NA	NA	NA	NA	NA	NA	NA
PA 12:1;0_16:0;0	PA	GPL	MEM	28	1	0	NA	NA	NA	NA	NA	NA	NA	NA	NA	NA	NA	NA
PA 12:1;0_16:1;0	PA	GPL	MEM	28	2	0	NA	NA	NA	NA	NA	NA	NA	NA	NA	NA	NA	NA
PA 12:1;0_18:0;0	PA	GPL	MEM	30	1	0	NA	NA	NA	NA	NA	NA	NA	NA	NA	NA	NA	NA
PA 12:1;0_18:1;0	PA	GPL	MEM	30	2	0	NA	NA	NA	NA	NA	NA	NA	NA	NA	NA	NA	NA
PA 13:0;0_16:0;0	PA	GPL	MEM	29	0	0	NA	NA	NA	NA	NA	NA	NA	NA	NA	NA	NA	NA
PA 13:0;0_16:1;0	PA	GPL	MEM	29	1	0	NA	NA	NA	NA	NA	NA	NA	NA	NA	NA	NA	NA
PA 13:0;0_18:0;0	PA	GPL	MEM	31	0	0	NA	NA	NA	NA	NA	NA	NA	NA	NA	NA	NA	NA
PA 13:0;0_18:1;0	PA	GPL	MEM	31	1	0	NA	NA	NA	NA	NA	NA	NA	NA	NA	NA	NA	NA
PA 13:1;0_16:0;0	PA	GPL	MEM	29	1	0	NA	NA	NA	NA	NA	NA	NA	NA	NA	NA	NA	NA
PA 14:0;0_14:0;0	PA	GPL	MEM	28	0	0	0.226741	0.294188	0.279873	0.0200571	NA	NA	0.328006	0.332521	0.38406	NA	0.0174302	0.0180855
PA 14:0;0_14:1;0	PA	GPL	MEM	28	1	0	0.374174	0.476677	0.52845	NA	NA	NA	0.60335	0.494156	0.704717	NA	NA	NA
PA 14:0;0_15:0;0	PA	GPL	MEM	29	0	0	NA	NA	NA	NA	NA	NA	NA	NA	NA	NA	NA	NA
PA 14:0;0_15:1;0	PA	GPL	MEM	29	1	0	NA	NA	NA	NA	NA	NA	NA	NA	NA	NA	NA	NA
PA 14:0;0_16:0;0	PA	GPL	MEM	30	0	0	1.46006	2.55298	2.37792	NA	NA	NA	3.19528	2.50459	3.94177	NA	NA	NA
PA 14:0;0_16:1;0	PA	GPL	MEM	30	1	0	22.323	27.2181	30.5619	0.521706	0.91871	0.733577	29.3691	29.0431	36.1316	0.961803	0.648029	0.598313
PA 14:0;0_17:0;0	PA	GPL	MEM	31	0	0	NA	NA	NA	NA	NA	NA	NA	NA	NA	NA	NA	NA
PA 14:0;0_17:1;0	PA	GPL	MEM	31	1	0	0.23299	0.201001	NA	0.0792559	NA	NA	0.244808	0.285847	0.279684	NA	NA	NA
PA 14:0;0_18:0;0	PA	GPL	MEM	32	0	0	NA	NA	NA	NA	NA	NA	NA	NA	NA	NA	NA	NA
PA 14:0;0_18:1;0	PA	GPL	MEM	32	1	0	26.039	32.5673	36.3345	2.1199	2.73634	2.1984	32.6459	34.4066	39.4593	2.52872	2.0972	1.65757
PA 14:0;0_18:2;0	PA	GPL	MEM	32	2	0	NA	NA	NA	NA	NA	NA	NA	NA	NA	NA	NA	NA
PA 14:0;0_18:3;0	PA	GPL	MEM	32	3	0	NA	NA	NA	NA	NA	NA	NA	NA	NA	NA	NA	NA
PA 14:0;0_20:0;0	PA	GPL	MEM	34	0	0	NA	NA	NA	NA	NA	NA	NA	NA	NA	NA	NA	NA
PA 14:0;0_22:0;0	PA	GPL	MEM	36	0	0	NA	NA	NA	NA	NA	NA	NA	NA	NA	NA	NA	NA
PA 14:0;0_24:0;0	PA	GPL	MEM	38	0	0	NA	NA	NA	NA	NA	NA	NA	NA	NA	NA	NA	NA
PA 14:0;0_26:0;0	PA	GPL	MEM	40	0	0	NA	NA	NA	NA	NA	NA	NA	NA	NA	NA	NA	NA
PA 14:1;0_14:1;0	PA	GPL	MEM	28	2	0	NA	NA	NA	NA	NA	NA	NA	NA	NA	NA	NA	NA
PA 14:1;0_15:0;0	PA	GPL	MEM	29	1	0	NA	NA	NA	NA	NA	NA	NA	NA	NA	NA	NA	NA
PA 14:1;0_16:0;0	PA	GPL	MEM	30	1	0	4.16674	4.9971	5.70567	0.257816	0.319796	0.327018	5.96272	5.60129	7.01133	NA	0.298426	NA
PA 14:1;0_16:1;0	PA	GPL	MEM	30	2	0	3.91424	4.87908	5.41225	NA	NA	NA	5.9023	5.33964	7.12563	NA	NA	NA
PA 14:1;0_17:1;0	PA	GPL	MEM	31	2	0	NA	NA	NA	NA	NA	NA	NA	NA	NA	NA	NA	NA
PA 14:1;0_18:0;0	PA	GPL	MEM	32	1	0	NA	NA	NA	NA	NA	NA	NA	NA	NA	NA	NA	NA
PA 14:1;0_18:1;0	PA	GPL	MEM	32	2	0	1.17465	1.42642	1.40616	0.262628	0.334676	0.222376	1.32492	1.66639	1.70194	0.270843	0.242972	0.182993
PA 14:1;0_20:0;0	PA	GPL	MEM	34	1	0	NA	NA	NA	NA	NA	NA	NA	NA	NA	NA	NA	NA
PA 15:0;0_16:0;0	PA	GPL	MEM	31	0	0	NA	NA	NA	NA	NA	NA	NA	NA	NA	NA	NA	NA
PA 15:0;0_16:1;0	PA	GPL	MEM	31	1	0	2.40298	2.55121	3.24344	0.554368	0.730225	0.630871	2.84012	3.3527	3.52921	0.595479	0.614151	0.412145
PA 15:0;0_18:0;0	PA	GPL	MEM	33	0	0	NA	NA	NA	NA	NA	NA	NA	NA	NA	NA	NA	NA
PA 15:0;0_18:1;0	PA	GPL	MEM	33	1	0	1.20415	1.35301	1.68373	1.46601	1.72099	1.46467	1.41284	2.13277	1.91591	1.22717	1.15821	0.805856
PA 15:0;0_18:2;0	PA	GPL	MEM	33	2	0	NA	NA	NA	NA	NA	NA	NA	NA	NA	NA	NA	NA
PA 15:1;0_16:0;0	PA	GPL	MEM	31	1	0	1.80618	2.09148	2.1967	NA	1.06458	1.0019	2.2439	2.28439	2.38091	NA	NA	NA
PA 15:1;0_16:1;0	PA	GPL	MEM	31	2	0	0.734371	0.920989	1.12261	NA	NA	NA	0.911683	0.964265	1.33906	NA	NA	NA
PA 15:1;0_18:0;0	PA	GPL	MEM	33	1	0	NA	NA	NA	NA	NA	NA	NA	NA	NA	NA	NA	NA
PA 15:1;0_18:1;0	PA	GPL	MEM	33	2	0	0.488371	0.575702	0.574655	0.285174	0.442558	0.326633	0.594225	0.676652	0.752114	0.372363	0.332819	NA
PA 16:0;0_16:0;0	PA	GPL	MEM	32	0	0	NA	NA	NA	NA	NA	NA	NA	NA	NA	NA	NA	NA
PA 16:0;0_16:1;0	PA	GPL	MEM	32	1	0	203.417	243.14	275.143	44.5388	55.4949	48.3296	261.165	278.789	328.072	45.6013	41.5821	29.4929
PA 16:0;0_16:2;0	PA	GPL	MEM	32	2	0	NA	NA	NA	NA	NA	NA	NA	NA	NA	NA	NA	NA
PA 16:0;0_17:0;0	PA	GPL	MEM	33	0	0	NA	NA	NA	NA	NA	NA	NA	NA	NA	NA	NA	NA
PA 16:0;0_17:1;0	PA	GPL	MEM	33	1	0	0.74385	0.91156	0.999866	0.698624	0.864814	0.834904	0.87586	1.30781	1.13805	0.641666	0.802286	0.535796
PA 16:0;0_18:0;0	PA	GPL	MEM	34	0	0	NA	NA	NA	NA	NA	NA	NA	NA	NA	NA	NA	NA
PA 16:0;0_18:1;0	PA	GPL	MEM	34	1	0	247.703	297.02	345.439	181.987	203.348	175.961	298.709	337.133	383.97	163.085	154.519	111.139
PA 16:0;0_18:2;0	PA	GPL	MEM	34	2	0	NA	NA	NA	NA	NA	NA	NA	NA	NA	NA	NA	NA
PA 16:0;0_18:3;0	PA	GPL	MEM	34	3	0	NA	NA	NA	NA	NA	NA	NA	NA	NA	NA	NA	NA
PA 16:0;0_20:0;0	PA	GPL	MEM	36	0	0	NA	NA	NA	NA	NA	NA	NA	NA	NA	NA	NA	NA
PA 16:0;0_20:1;0	PA	GPL	MEM	36	1	0	NA	NA	NA	NA	NA	NA	NA	NA	NA	NA	NA	NA
PA 16:0;0_22:0;0	PA	GPL	MEM	38	0	0	NA	NA	NA	NA	NA	NA	NA	NA	NA	NA	NA	NA
PA 16:0;0_24:0;0	PA	GPL	MEM	40	0	0	NA	NA	NA	NA	NA	NA	NA	NA	NA	NA	NA	NA
PA 16:0;0_26:0;0	PA	GPL	MEM	42	0	0	NA	NA	NA	NA	NA	NA	NA	NA	NA	NA	NA	NA
PA 16:1;0_16:1;0	PA	GPL	MEM	32	2	0	248.614	311.182	353.499	48.0426	67.0847	56.49	329.221	341.062	432.769	57.4135	54.7759	35.147
PA 16:1;0_16:2;0	PA	GPL	MEM	32	3	0	NA	NA	NA	NA	NA	NA	NA	NA	NA	NA	NA	NA
PA 16:1;0_17:0;0	PA	GPL	MEM	33	1	0	0.624355	0.731904	0.878417	0.467745	0.469909	0.414684	0.73145	NA	0.964892	0.416999	0.391347	0.261459
PA 16:1;0_17:1;0	PA	GPL	MEM	33	2	0	0.537301	0.680559	0.777532	0.243951	0.344852	0.329294	0.666053	0.782458	0.989448	0.30525	0.281633	0.392482
PA 16:1;0_18:0;0	PA	GPL	MEM	34	1	0	16.4624	20.0167	24.1179	8.93199	10.6894	9.27163	18.6523	22.8335	24.6026	8.89024	8.64728	6.13526
PA 16:1;0_18:1;0	PA	GPL	MEM	34	2	0	305.534	385.31	444.043	160.611	200.727	169.514	360.59	406.655	488.477	190.727	176.104	121.204
PA 16:1;0_18:2;0	PA	GPL	MEM	34	3	0	NA	NA	NA	NA	1.26896	0.964443	NA	NA	NA	NA	NA	NA
PA 16:1;0_18:3;0	PA	GPL	MEM	34	4	0	NA	NA	NA	NA	NA	NA	NA	NA	NA	NA	NA	NA
PA 16:1;0_20:0;0	PA	GPL	MEM	36	1	0	NA	NA	NA	NA	NA	NA	NA	NA	NA	NA	NA	NA
PA 16:1;0_20:1;0	PA	GPL	MEM	36	2	0	4.25806	5.14533	5.95185	NA	NA	NA	4.71019	5.67752	5.9523	NA	NA	NA
PA 16:1;0_22:0;0	PA	GPL	MEM	38	1	0	NA	NA	NA	NA	NA	NA	NA	NA	NA	NA	NA	NA
PA 16:2;0_18:1;0	PA	GPL	MEM	34	3	0	NA	NA	5.24672	NA	NA	NA	NA	NA	6.36228	NA	NA	NA
PA 17:0;0_17:1;0	PA	GPL	MEM	34	1	0	NA	NA	NA	NA	NA	NA	NA	NA	NA	NA	NA	NA
PA 17:0;0_18:1;0	PA	GPL	MEM	35	1	0	NA	NA	NA	0.325312	0.332674	0.274604	NA	NA	NA	NA	NA	NA
PA 17:1;0_17:1;0	PA	GPL	MEM	34	2	0	NA	NA	NA	0.159688	NA	0.133802	0.259074	NA	NA	0.19803	0.163547	0.16277
PA 17:1;0_18:0;0	PA	GPL	MEM	35	1	0	NA	NA	NA	0.155658	0.168579	0.177547	NA	NA	NA	NA	NA	NA
PA 18:0;0_18:0;0	PA	GPL	MEM	36	0	0	NA	NA	NA	NA	NA	NA	NA	NA	NA	NA	NA	NA
PA 18:0;0_18:1;0	PA	GPL	MEM	36	1	0	5.41479	6.90025	7.46535	6.39665	7.23616	6.41596	5.89121	6.68427	7.52215	4.53047	4.74962	3.30354
PA 18:0;0_18:2;0	PA	GPL	MEM	36	2	0	NA	NA	NA	NA	NA	NA	NA	NA	NA	NA	NA	NA
PA 18:0;0_18:3;0	PA	GPL	MEM	36	3	0	NA	NA	NA	NA	NA	NA	NA	NA	NA	NA	NA	NA
PA 18:0;0_20:0;0	PA	GPL	MEM	38	0	0	NA	NA	NA	NA	NA	NA	NA	NA	NA	NA	NA	NA
PA 18:0;0_22:0;0	PA	GPL	MEM	40	0	0	NA	NA	NA	NA	NA	NA	NA	NA	NA	NA	NA	NA
PA 18:0;0_24:0;0	PA	GPL	MEM	42	0	0	NA	NA	NA	NA	NA	NA	NA	NA	NA	NA	NA	NA
PA 18:1;0_18:1;0	PA	GPL	MEM	36	2	0	15.9734	19.9753	23.6783	12.2606	16.1917	13.8873	17.3528	19.2857	22.7329	12.8419	12.3445	8.35832
PA 18:1;0_18:2;0	PA	GPL	MEM	36	3	0	NA	NA	NA	NA	NA	NA	NA	NA	NA	NA	NA	NA
PA 18:1;0_20:0;0	PA	GPL	MEM	38	1	0	NA	NA	NA	NA	NA	NA	NA	NA	NA	NA	NA	NA
PA 20:0;0_20:0;0	PA	GPL	MEM	40	0	0	NA	NA	NA	NA	NA	NA	NA	NA	NA	NA	NA	NA
PC 10:0;0_12:0;0	PC	GPL	MEM	22	0	0	NA	NA	NA	NA	NA	NA	NA	NA	NA	NA	NA	NA
PC 10:0;0_14:0;0	PC	GPL	MEM	24	0	0	NA	NA	NA	NA	NA	NA	NA	NA	NA	NA	NA	NA
PC 10:0;0_14:1;0	PC	GPL	MEM	24	1	0	NA	NA	NA	NA	NA	NA	NA	NA	NA	NA	NA	NA
PC 10:0;0_15:0;0	PC	GPL	MEM	25	0	0	NA	NA	NA	NA	NA	NA	NA	NA	NA	NA	NA	NA
PC 10:0;0_16:0;0	PC	GPL	MEM	26	0	0	0.975463	1.02177	1.19652	NA	NA	NA	1.28902	1.31706	1.83529	NA	NA	NA
PC 10:0;0_16:1;0	PC	GPL	MEM	26	1	0	4.13345	5.57885	5.25373	NA	NA	NA	5.26767	5.60858	6.90268	NA	NA	NA
PC 10:0;0_17:0;0	PC	GPL	MEM	27	0	0	NA	NA	NA	NA	NA	NA	NA	NA	NA	NA	NA	NA
PC 10:0;0_18:0;0	PC	GPL	MEM	28	0	0	NA	NA	NA	NA	NA	NA	NA	NA	NA	NA	0.279151	NA
PC 10:0;0_18:1;0	PC	GPL	MEM	28	1	0	1.79619	1.85374	1.97904	NA	NA	NA	1.66278	1.80782	2.09018	NA	NA	NA
PC 10:0;0_18:2;0	PC	GPL	MEM	28	2	0	NA	NA	NA	NA	NA	NA	NA	NA	NA	NA	NA	NA
PC 10:0;0_20:0;0	PC	GPL	MEM	30	0	0	NA	NA	NA	NA	NA	NA	NA	NA	NA	NA	NA	NA
PC 10:1;0_16:0;0	PC	GPL	MEM	26	1	0	NA	NA	NA	NA	NA	NA	NA	NA	NA	NA	NA	NA
PC 10:1;0_18:0;0	PC	GPL	MEM	28	1	0	NA	NA	NA	NA	NA	NA	NA	NA	NA	NA	NA	NA
PC 11:0;0_16:0;0	PC	GPL	MEM	27	0	0	NA	NA	NA	NA	NA	NA	NA	NA	NA	NA	NA	NA
PC 11:0;0_16:1;0	PC	GPL	MEM	27	1	0	NA	NA	NA	NA	NA	NA	NA	NA	NA	NA	NA	NA
PC 11:1;0_16:0;0	PC	GPL	MEM	27	1	0	NA	NA	NA	NA	NA	NA	NA	NA	NA	NA	NA	NA
PC 12:0;0_12:0;0	PC	GPL	MEM	24	0	0	NA	NA	NA	NA	NA	NA	NA	NA	NA	NA	NA	NA
PC 12:0;0_12:1;0	PC	GPL	MEM	24	1	0	NA	NA	NA	NA	NA	NA	NA	NA	NA	NA	NA	NA
PC 12:0;0_13:1;0	PC	GPL	MEM	25	1	0	NA	NA	NA	NA	NA	NA	NA	NA	NA	NA	NA	NA
PC 12:0;0_14:0;0	PC	GPL	MEM	26	0	0	NA	NA	NA	NA	NA	NA	NA	NA	NA	NA	NA	NA
PC 12:0;0_14:1;0	PC	GPL	MEM	26	1	0	NA	NA	NA	NA	NA	NA	NA	NA	NA	NA	NA	NA
PC 12:0;0_15:0;0	PC	GPL	MEM	27	0	0	NA	NA	NA	NA	NA	NA	NA	NA	NA	NA	NA	NA
PC 12:0;0_15:1;0	PC	GPL	MEM	27	1	0	NA	NA	NA	NA	NA	NA	NA	NA	NA	NA	NA	NA
PC 12:0;0_16:0;0	PC	GPL	MEM	28	0	0	3.01121	3.65567	4.01001	6.58048	7.05639	5.43461	3.65845	3.52224	4.64889	8.50279	6.10962	4.62613
PC 12:0;0_16:1;0	PC	GPL	MEM	28	1	0	13.4925	15.6845	14.696	6.02391	7.10889	4.94734	15.5184	15.9016	19.6621	7.6156	6.4835	3.81919
PC 12:0;0_17:0;0	PC	GPL	MEM	29	0	0	NA	NA	NA	NA	NA	NA	NA	NA	NA	NA	NA	NA
PC 12:0;0_17:1;0	PC	GPL	MEM	29	1	0	NA	NA	NA	0.697548	NA	NA	2.73737	NA	NA	NA	NA	NA
PC 12:0;0_18:0;0	PC	GPL	MEM	30	0	0	0.300477	NA	0.35147	1.36179	1.63894	1.22652	0.314936	0.276935	0.425086	1.70118	1.24535	0.931302
PC 12:0;0_20:0;0	PC	GPL	MEM	32	0	0	NA	NA	NA	NA	NA	NA	NA	NA	NA	NA	NA	NA
PC 12:1;0_12:1;0	PC	GPL	MEM	24	2	0	NA	NA	NA	NA	NA	NA	NA	NA	NA	NA	NA	NA
PC 12:1;0_14:0;0	PC	GPL	MEM	26	1	0	NA	NA	NA	NA	NA	NA	NA	NA	NA	NA	NA	NA
PC 12:1;0_14:1;0	PC	GPL	MEM	26	2	0	NA	NA	NA	NA	NA	NA	NA	NA	NA	NA	NA	NA
PC 12:1;0_15:0;0	PC	GPL	MEM	27	1	0	NA	NA	NA	NA	NA	NA	NA	NA	NA	NA	NA	NA
PC 12:1;0_16:0;0	PC	GPL	MEM	28	1	0	NA	NA	NA	NA	NA	NA	NA	NA	NA	NA	NA	NA
PC 12:1;0_16:1;0	PC	GPL	MEM	28	2	0	NA	NA	NA	NA	NA	NA	NA	NA	NA	NA	NA	NA
PC 12:1;0_17:0;0	PC	GPL	MEM	29	1	0	NA	NA	NA	NA	NA	NA	NA	NA	NA	NA	NA	NA
PC 12:1;0_17:1;0	PC	GPL	MEM	29	2	0	NA	NA	NA	NA	NA	NA	NA	NA	NA	NA	NA	NA
PC 12:1;0_18:1;0	PC	GPL	MEM	30	2	0	NA	NA	NA	NA	NA	NA	NA	NA	NA	NA	NA	NA
PC 13:0;0_14:0;0	PC	GPL	MEM	27	0	0	NA	NA	NA	NA	NA	NA	NA	NA	NA	NA	NA	NA
PC 13:0;0_16:0;0	PC	GPL	MEM	29	0	0	NA	NA	NA	NA	NA	NA	NA	NA	NA	NA	NA	NA
PC 13:0;0_16:1;0	PC	GPL	MEM	29	1	0	NA	NA	NA	NA	NA	NA	NA	NA	NA	NA	NA	NA
PC 13:0;0_17:0;0	PC	GPL	MEM	30	0	0	NA	NA	NA	NA	NA	NA	NA	NA	NA	NA	0.228601	NA
PC 13:0;0_18:0;0	PC	GPL	MEM	31	0	0	NA	NA	NA	NA	NA	NA	NA	NA	NA	NA	NA	NA
PC 13:1;0_16:0;0	PC	GPL	MEM	29	1	0	NA	NA	NA	NA	NA	NA	NA	NA	NA	NA	NA	NA
PC 13:1;0_16:1;0	PC	GPL	MEM	29	2	0	NA	NA	NA	NA	NA	NA	NA	NA	NA	NA	NA	NA
PC 14:0;0_14:0;0	PC	GPL	MEM	28	0	0	NA	NA	NA	NA	NA	NA	NA	NA	NA	NA	NA	NA
PC 14:0;0_14:1;0	PC	GPL	MEM	28	1	0	NA	NA	0.912569	NA	NA	NA	0.96576	0.933397	1.00567	NA	NA	NA
PC 14:0;0_15:0;0	PC	GPL	MEM	29	0	0	NA	NA	NA	NA	NA	NA	NA	NA	NA	NA	NA	NA
PC 14:0;0_15:1;0	PC	GPL	MEM	29	1	0	NA	NA	NA	NA	NA	NA	NA	NA	NA	NA	NA	NA
PC 14:0;0_16:0;0	PC	GPL	MEM	30	0	0	1.09254	1.9421	1.51888	1.61835	1.77136	1.46693	1.38939	1.31174	1.87731	2.57529	1.48462	1.46056
PC 14:0;0_16:2;0	PC	GPL	MEM	30	2	0	NA	NA	NA	NA	NA	NA	NA	NA	NA	NA	NA	NA
PC 14:0;0_17:0;0	PC	GPL	MEM	31	0	0	NA	NA	NA	NA	NA	NA	NA	NA	NA	NA	NA	NA
PC 14:0;0_17:1;0	PC	GPL	MEM	31	1	0	NA	NA	NA	NA	NA	NA	NA	NA	NA	NA	NA	NA
PC 14:0;0_18:0;0	PC	GPL	MEM	32	0	0	NA	NA	NA	0.103492	NA	0.0901111	NA	NA	NA	NA	NA	0.0691235
PC 14:0;0_18:1;0	PC	GPL	MEM	32	1	0	6.86333	8.1406	8.61226	6.27834	7.02889	4.85781	7.75524	7.24612	10.0074	7.33072	5.77127	4.0853
PC 14:0;0_18:2;0	PC	GPL	MEM	32	2	0	NA	NA	NA	NA	NA	NA	NA	NA	NA	NA	NA	NA
PC 14:0;0_18:3;0	PC	GPL	MEM	32	3	0	NA	NA	NA	NA	NA	NA	NA	NA	NA	NA	NA	NA
PC 14:0;0_20:0;0	PC	GPL	MEM	34	0	0	NA	NA	NA	NA	NA	NA	NA	NA	NA	NA	NA	NA
PC 14:0;0_22:0;0	PC	GPL	MEM	36	0	0	NA	NA	NA	NA	NA	NA	NA	NA	NA	NA	NA	NA
PC 14:0;0_24:0;0	PC	GPL	MEM	38	0	0	NA	NA	NA	NA	NA	NA	NA	NA	NA	NA	NA	NA
PC 14:1;0_15:0;0	PC	GPL	MEM	29	1	0	NA	NA	NA	NA	NA	NA	NA	NA	NA	NA	NA	NA
PC 14:1;0_16:1;0	PC	GPL	MEM	30	2	0	24.0198	29.3986	27.4279	31.9389	33.3931	24.5339	30.4839	29.6769	39.9479	33.2089	27.3184	20.606
PC 14:1;0_17:1;0	PC	GPL	MEM	31	2	0	NA	NA	NA	NA	NA	NA	NA	NA	NA	NA	NA	NA
PC 14:1;0_18:0;0	PC	GPL	MEM	32	1	0	0.527923	0.561083	0.793908	0.841891	0.937042	0.748524	0.76129	0.64603	0.711549	0.880744	0.676807	NA
PC 14:1;0_18:1;0	PC	GPL	MEM	32	2	0	3.97567	4.2602	4.07356	1.78439	2.17116	1.39982	4.03562	4.05677	5.66452	1.90987	1.43578	1.35811
PC 14:1;0_18:2;0	PC	GPL	MEM	32	3	0	NA	NA	NA	NA	NA	NA	NA	NA	NA	NA	NA	NA
PC 15:0;0_15:0;0	PC	GPL	MEM	30	0	0	NA	NA	NA	NA	NA	NA	NA	NA	NA	NA	NA	NA
PC 15:0;0_16:0;0	PC	GPL	MEM	31	0	0	NA	NA	NA	NA	NA	NA	NA	NA	NA	NA	NA	NA
PC 15:0;0_16:1;0	PC	GPL	MEM	31	1	0	12.067	12.3993	13.9549	11.9898	12.6525	11.3066	11.9668	11.9208	14.3249	13.9762	12.1213	8.18944
PC 15:0;0_17:0;0	PC	GPL	MEM	32	0	0	NA	NA	NA	0.0442424	NA	0.0432937	NA	NA	NA	0.0608787	0.0405224	0.0696205
PC 15:0;0_18:0;0	PC	GPL	MEM	33	0	0	NA	NA	NA	NA	NA	NA	NA	NA	NA	NA	NA	NA
PC 15:0;0_18:1;0	PC	GPL	MEM	33	1	0	3.12568	NA	4.41138	8.22013	8.96885	7.88085	3.09664	NA	3.1518	8.74122	7.46009	5.35922
PC 15:1;0_15:1;0	PC	GPL	MEM	30	2	0	NA	NA	NA	NA	NA	NA	NA	0.26717	NA	NA	NA	NA
PC 15:1;0_16:0;0	PC	GPL	MEM	31	1	0	8.29703	8.30478	8.66812	6.10487	6.58797	5.51711	6.56998	7.4207	8.42365	6.58436	5.9956	4.16726
PC 15:1;0_16:1;0	PC	GPL	MEM	31	2	0	54.4199	55.7932	62.1381	35.4392	38.225	29.7836	54.8878	58.362	72.6862	36.702	30.6283	22.0533
PC 15:1;0_18:0;0	PC	GPL	MEM	33	1	0	NA	NA	NA	1.49603	1.50014	1.57342	NA	0.429975	1.02357	1.41977	1.15632	0.831386
PC 15:1;0_18:1;0	PC	GPL	MEM	33	2	0	NA	NA	NA	18.7968	19.5173	16.3348	NA	22.0657	NA	17.6343	15.9212	11.4306
PC 16:0;0_16:0;0	PC	GPL	MEM	32	0	0	NA	NA	NA	0.890442	0.912181	0.803047	NA	NA	NA	1.95669	1.02942	0.78747
PC 16:0;0_16:1;0	PC	GPL	MEM	32	1	0	95.1567	108.925	123.082	165.402	188.001	147.866	110.934	104.621	145.362	213.114	169.278	113.695
PC 16:0;0_16:2;0	PC	GPL	MEM	32	2	0	NA	NA	NA	NA	NA	NA	NA	NA	NA	NA	NA	NA
PC 16:0;0_17:0;0	PC	GPL	MEM	33	0	0	NA	NA	NA	NA	NA	NA	NA	NA	NA	NA	NA	NA
PC 16:0;0_17:1;0	PC	GPL	MEM	33	1	0	0.301278	0.185531	0.475095	2.25428	2.36802	1.99486	0.317796	0.163771	0.405866	2.30473	1.94693	1.37703
PC 16:0;0_17:2;0	PC	GPL	MEM	33	2	0	NA	NA	NA	NA	NA	NA	NA	NA	NA	NA	NA	NA
PC 16:0;0_18:0;0	PC	GPL	MEM	34	0	0	NA	NA	NA	NA	NA	NA	NA	NA	NA	NA	NA	NA
PC 16:0;0_18:1;0	PC	GPL	MEM	34	1	0	46.0508	53.3708	60.0726	157.741	177.913	140.367	50.7603	47.6239	67.8948	194.441	158.584	112.254
PC 16:0;0_18:2;0	PC	GPL	MEM	34	2	0	NA	NA	NA	NA	NA	NA	NA	NA	NA	NA	0.400899	NA
PC 16:0;0_18:3;0	PC	GPL	MEM	34	3	0	NA	NA	NA	NA	NA	NA	NA	NA	NA	NA	NA	NA
PC 16:0;0_19:1;0	PC	GPL	MEM	35	1	0	NA	NA	NA	NA	NA	NA	NA	NA	NA	NA	NA	NA
PC 16:0;0_20:0;0	PC	GPL	MEM	36	0	0	NA	NA	NA	NA	NA	NA	NA	NA	NA	NA	NA	NA
PC 16:0;0_20:1;0	PC	GPL	MEM	36	1	0	0.452043	NA	NA	0.309007	0.433204	0.376931	0.122925	NA	NA	0.358723	NA	0.218729
PC 16:0;0_20:3;0	PC	GPL	MEM	36	3	0	NA	NA	NA	NA	NA	NA	NA	NA	NA	NA	NA	NA
PC 16:0;0_20:4;0	PC	GPL	MEM	36	4	0	NA	NA	NA	NA	NA	NA	NA	NA	NA	NA	NA	NA
PC 16:0;0_20:5;0	PC	GPL	MEM	36	5	0	NA	NA	NA	NA	NA	NA	NA	NA	NA	NA	NA	NA
PC 16:0;0_22:0;0	PC	GPL	MEM	38	0	0	NA	NA	NA	NA	NA	NA	NA	NA	NA	NA	NA	NA
PC 16:0;0_24:0;0	PC	GPL	MEM	40	0	0	NA	NA	NA	NA	NA	NA	NA	NA	NA	NA	NA	NA
PC 16:0;0_26:0;0	PC	GPL	MEM	42	0	0	NA	NA	NA	NA	NA	NA	NA	NA	NA	NA	NA	NA
PC 16:1;0_16:1;0	PC	GPL	MEM	32	2	0	504.774	571.842	590.232	245.652	279.173	213.731	569.333	575.157	729.764	289.781	253.539	158.696
PC 16:1;0_16:2;0	PC	GPL	MEM	32	3	0	3.1233	3.80158	4.0497	NA	1.91548	1.4541	3.7534	3.78857	4.90007	NA	1.70796	NA
PC 16:1;0_17:0;0	PC	GPL	MEM	33	1	0	NA	3.6984	NA	6.78419	7.41249	5.51931	NA	3.20771	NA	7.29961	6.39496	4.28986
PC 16:1;0_17:1;0	PC	GPL	MEM	33	2	0	29.8766	31.1882	35.6052	9.1203	9.49464	8.2021	28.2397	8.71481	36.3812	8.80378	8.41243	5.56007
PC 16:1;0_18:0;0	PC	GPL	MEM	34	1	0	NA	NA	NA	54.0836	60.4195	45.5536	NA	NA	NA	62.7127	49.8919	35.3507
PC 16:1;0_18:1;0	PC	GPL	MEM	34	2	0	458.207	522.443	548.598	389.574	438.387	340.58	482.42	490.034	629.732	429.52	377.443	237.423
PC 16:1;0_18:2;0	PC	GPL	MEM	34	3	0	NA	0.710295	0.828186	0.803118	0.801033	0.711939	NA	0.6397	0.867879	0.828703	0.699067	0.479325
PC 16:1;0_18:3;0	PC	GPL	MEM	34	4	0	NA	NA	NA	NA	NA	NA	NA	NA	NA	NA	NA	NA
PC 16:1;0_19:1;0	PC	GPL	MEM	35	2	0	NA	NA	NA	NA	NA	NA	NA	NA	NA	NA	NA	NA
PC 16:1;0_20:0;0	PC	GPL	MEM	36	1	0	NA	NA	NA	NA	3.06337	1.91296	1.94259	NA	NA	3.0571	2.32156	1.21199
PC 16:1;0_20:1;0	PC	GPL	MEM	36	2	0	3.45773	3.42413	3.37724	1.487	1.62026	1.33224	3.14652	3.14786	4.35308	1.67166	1.42739	0.92202
PC 16:1;0_22:0;0	PC	GPL	MEM	38	1	0	NA	NA	NA	0.232227	0.239199	NA	NA	NA	NA	0.265594	NA	NA
PC 16:1;0_24:0;0	PC	GPL	MEM	40	1	0	NA	NA	NA	NA	NA	NA	NA	NA	NA	NA	NA	NA
PC 16:1;0_25:0;0	PC	GPL	MEM	41	1	0	NA	NA	NA	NA	0.499494	NA	NA	NA	NA	0.467251	NA	NA
PC 16:1;0_26:0;0	PC	GPL	MEM	42	1	0	NA	NA	NA	1.79522	1.6546	1.44244	NA	NA	NA	2.23822	1.47986	1.0602
PC 16:2;0_18:0;0	PC	GPL	MEM	34	2	0	NA	NA	NA	NA	NA	NA	NA	NA	NA	NA	NA	NA
PC 16:2;0_18:1;0	PC	GPL	MEM	34	3	0	NA	NA	NA	NA	NA	NA	NA	NA	NA	NA	NA	NA
PC 17:0;0_17:0;0	PC	GPL	MEM	34	0	0	NA	NA	NA	NA	NA	NA	NA	NA	NA	NA	NA	NA
PC 17:0;0_18:0;0	PC	GPL	MEM	35	0	0	NA	NA	NA	NA	NA	NA	NA	NA	NA	NA	NA	NA
PC 17:0;0_18:1;0	PC	GPL	MEM	35	1	0	NA	NA	NA	5.37669	5.91278	4.56283	NA	NA	NA	5.0417	4.38554	3.0101
PC 17:0;0_20:6;0	PC	GPL	MEM	37	6	0	NA	NA	NA	1.1972	NA	NA	NA	NA	NA	NA	NA	NA
PC 17:0;0_24:0;0	PC	GPL	MEM	41	0	0	NA	NA	NA	NA	NA	NA	NA	NA	NA	NA	NA	NA
PC 17:1;0_18:0;0	PC	GPL	MEM	35	1	0	NA	NA	NA	0.730543	0.739061	0.657946	NA	NA	NA	0.61085	0.566436	0.389595
PC 17:1;0_18:1;0	PC	GPL	MEM	35	2	0	3.46568	3.63974	4.34894	5.74593	6.36268	5.22133	3.27104	3.447	4.07034	5.42154	5.24311	3.49382
PC 18:0;0_18:0;0	PC	GPL	MEM	36	0	0	NA	NA	NA	NA	NA	NA	NA	NA	NA	NA	NA	NA
PC 18:0;0_18:1;0	PC	GPL	MEM	36	1	0	4.80262	6.17739	7.25881	64.2438	71.2443	56.3177	3.06413	5.01143	7.19695	67.73	54.4537	37.2539
PC 18:0;0_18:2;0	PC	GPL	MEM	36	2	0	NA	NA	NA	NA	NA	NA	NA	NA	NA	NA	NA	NA
PC 18:0;0_18:3;0	PC	GPL	MEM	36	3	0	NA	NA	NA	NA	NA	NA	NA	NA	NA	NA	NA	NA
PC 18:0;0_20:0;0	PC	GPL	MEM	38	0	0	NA	NA	NA	NA	NA	NA	NA	NA	NA	NA	NA	NA
PC 18:1;0_18:1;0	PC	GPL	MEM	36	2	0	31.3239	38.1616	39.8545	65.0266	72.5837	57.0128	32.7851	33.072	42.8328	68.4009	60.7172	38.0869
PC 18:1;0_18:2;0	PC	GPL	MEM	36	3	0	NA	NA	NA	NA	NA	NA	NA	NA	NA	NA	NA	NA
PC 18:1;0_18:3;0	PC	GPL	MEM	36	4	0	NA	NA	NA	NA	NA	NA	NA	NA	NA	NA	NA	NA
PC 18:1;0_20:0;0	PC	GPL	MEM	38	1	0	NA	NA	NA	0.557904	0.603156	NA	NA	NA	NA	0.664585	NA	NA
PC 18:1;0_20:1;0	PC	GPL	MEM	38	2	0	1.48276	1.67841	1.74321	1.5641	1.61719	1.26648	1.59236	1.63313	2.05618	1.42907	1.16312	0.845307
PC 18:1;0_22:0;0	PC	GPL	MEM	40	1	0	NA	NA	NA	NA	NA	NA	NA	NA	NA	NA	NA	NA
PC 18:1;0_24:0;0	PC	GPL	MEM	42	1	0	NA	NA	NA	NA	NA	NA	NA	NA	NA	NA	NA	NA
PE 10:0;0_16:0;0	PE	GPL	MEM	26	0	0	2.86267	3.23276	3.07955	NA	NA	NA	3.984	3.74293	4.35177	NA	NA	NA
PE 10:0;0_16:1;0	PE	GPL	MEM	26	1	0	1.98495	2.54078	2.26684	NA	NA	NA	2.58533	2.44882	2.81007	NA	NA	NA
PE 10:0;0_18:0;0	PE	GPL	MEM	28	0	0	0.357337	0.348784	0.379396	0.0384055	NA	0.0278834	0.401007	0.37195	0.500017	NA	0.0487551	NA
PE 10:0;0_18:1;0	PE	GPL	MEM	28	1	0	0.764703	0.923773	0.896669	NA	NA	NA	1.05642	0.825568	1.10849	NA	NA	NA
PE 10:1;0_16:0;0	PE	GPL	MEM	26	1	0	0.0995198	NA	NA	NA	NA	NA	NA	NA	NA	NA	NA	NA
PE 10:1;0_18:0;0	PE	GPL	MEM	28	1	0	NA	NA	NA	NA	NA	NA	NA	NA	NA	NA	NA	NA
PE 11:0;0_16:0;0	PE	GPL	MEM	27	0	0	NA	NA	NA	NA	NA	NA	NA	NA	NA	NA	NA	NA
PE 11:0;0_16:1;0	PE	GPL	MEM	27	1	0	NA	NA	NA	NA	NA	NA	NA	NA	NA	NA	NA	NA
PE 11:0;0_18:0;0	PE	GPL	MEM	29	0	0	NA	NA	NA	NA	NA	NA	NA	NA	NA	NA	NA	NA
PE 12:0;0_14:0;0	PE	GPL	MEM	26	0	0	0.387402	0.383727	0.3823	NA	NA	NA	0.53016	0.46914	0.603351	NA	NA	NA
PE 12:0;0_14:1;0	PE	GPL	MEM	26	1	0	NA	NA	NA	NA	NA	NA	NA	NA	NA	NA	NA	NA
PE 12:0;0_15:0;0	PE	GPL	MEM	27	0	0	NA	NA	NA	NA	NA	NA	NA	NA	NA	NA	NA	NA
PE 12:0;0_16:0;0	PE	GPL	MEM	28	0	0	2.90693	3.34065	3.19176	0.350656	0.46737	0.23703	3.91906	3.88549	4.84809	0.418052	0.314479	0.262158
PE 12:0;0_16:1;0	PE	GPL	MEM	28	1	0	6.12424	7.29618	6.77411	0.548286	0.504305	0.320973	7.88203	7.30162	8.49423	0.404935	0.334018	0.19931
PE 12:0;0_17:0;0	PE	GPL	MEM	29	0	0	NA	NA	NA	NA	NA	NA	NA	NA	NA	NA	NA	NA
PE 12:0;0_18:0;0	PE	GPL	MEM	30	0	0	0.275512	NA	0.314947	0.175984	0.178579	0.123059	0.295941	0.289383	0.380166	0.171572	0.120838	0.098596
PE 12:0;0_18:1;0	PE	GPL	MEM	30	1	0	1.59398	1.83456	1.72896	0.38728	0.413097	0.281697	1.76805	1.77542	2.17814	0.38845	0.32111	0.206861
PE 12:1;0_14:0;0	PE	GPL	MEM	26	1	0	NA	NA	NA	NA	NA	NA	NA	NA	NA	NA	NA	NA
PE 12:1;0_16:0;0	PE	GPL	MEM	28	1	0	NA	NA	NA	NA	NA	NA	NA	NA	NA	NA	NA	NA
PE 12:1;0_16:1;0	PE	GPL	MEM	28	2	0	NA	NA	NA	NA	NA	NA	NA	NA	NA	NA	NA	NA
PE 12:1;0_17:0;0	PE	GPL	MEM	29	1	0	NA	NA	NA	NA	NA	NA	NA	NA	NA	NA	NA	NA
PE 12:1;0_18:0;0	PE	GPL	MEM	30	1	0	NA	NA	NA	NA	NA	NA	NA	NA	NA	NA	NA	NA
PE 12:1;0_18:1;0	PE	GPL	MEM	30	2	0	NA	NA	NA	NA	NA	NA	NA	NA	NA	NA	NA	NA
PE 13:0;0_16:0;0	PE	GPL	MEM	29	0	0	NA	NA	NA	NA	NA	NA	NA	NA	NA	NA	NA	NA
PE 13:0;0_16:1;0	PE	GPL	MEM	29	1	0	NA	NA	NA	NA	NA	NA	NA	NA	NA	NA	NA	NA
PE 13:0;0_18:0;0	PE	GPL	MEM	31	0	0	NA	NA	NA	NA	NA	NA	NA	NA	NA	NA	NA	NA
PE 13:0;0_18:1;0	PE	GPL	MEM	31	1	0	NA	NA	NA	NA	NA	NA	NA	NA	NA	NA	NA	NA
PE 13:1;0_16:0;0	PE	GPL	MEM	29	1	0	NA	NA	NA	NA	NA	NA	NA	NA	NA	NA	NA	NA
PE 14:0;0_14:0;0	PE	GPL	MEM	28	0	0	0.125762	0.112837	0.13489	NA	NA	NA	0.148924	0.143222	0.15564	NA	NA	NA
PE 14:0;0_14:1;0	PE	GPL	MEM	28	1	0	0.18871	0.247024	0.239143	NA	NA	NA	0.305975	0.2187	0.244106	NA	NA	NA
PE 14:0;0_15:0;0	PE	GPL	MEM	29	0	0	NA	NA	NA	NA	NA	NA	NA	NA	NA	NA	NA	NA
PE 14:0;0_15:1;0	PE	GPL	MEM	29	1	0	NA	NA	NA	NA	NA	NA	NA	NA	NA	NA	NA	NA
PE 14:0;0_16:0;0	PE	GPL	MEM	30	0	0	0.80869	1.23795	0.85357	0.184429	0.205551	0.124291	0.856211	0.88311	1.15916	0.233504	0.133593	0.123966
PE 14:0;0_16:1;0	PE	GPL	MEM	30	1	0	11.8098	13.4761	12.509	1.05224	1.08901	0.685003	14.5588	13.6416	16.7689	1.02937	0.804849	0.622844
PE 14:0;0_17:1;0	PE	GPL	MEM	31	1	0	NA	NA	NA	NA	NA	NA	NA	0.18017	NA	NA	NA	NA
PE 14:0;0_18:0;0	PE	GPL	MEM	32	0	0	NA	NA	NA	NA	NA	NA	NA	NA	NA	NA	NA	NA
PE 14:0;0_18:1;0	PE	GPL	MEM	32	1	0	13.2426	14.8661	14.5534	2.55097	2.59735	1.83566	16.7231	15.2371	18.8605	2.60721	1.89092	1.41538
PE 14:0;0_18:2;0	PE	GPL	MEM	32	2	0	NA	NA	NA	NA	NA	NA	NA	NA	NA	NA	NA	NA
PE 14:0;0_18:3;0	PE	GPL	MEM	32	3	0	NA	NA	NA	NA	NA	NA	NA	NA	NA	NA	NA	NA
PE 14:1;0_14:1;0	PE	GPL	MEM	28	2	0	NA	NA	NA	NA	NA	NA	NA	NA	NA	NA	NA	NA
PE 14:1;0_15:0;0	PE	GPL	MEM	29	1	0	NA	NA	NA	NA	NA	NA	NA	NA	NA	NA	NA	NA
PE 14:1;0_16:0;0	PE	GPL	MEM	30	1	0	1.33348	1.53288	1.41449	NA	0.188671	NA	1.65177	1.5298	1.76663	NA	NA	NA
PE 14:1;0_16:1;0	PE	GPL	MEM	30	2	0	1.46562	1.53487	1.43647	NA	NA	NA	1.69106	1.61961	2.10717	NA	NA	NA
PE 14:1;0_17:1;0	PE	GPL	MEM	31	2	0	NA	NA	NA	NA	NA	NA	NA	NA	NA	NA	NA	NA
PE 14:1;0_18:0;0	PE	GPL	MEM	32	1	0	NA	NA	NA	NA	NA	0.134246	NA	NA	NA	NA	NA	NA
PE 14:1;0_18:1;0	PE	GPL	MEM	32	2	0	0.832779	1.18011	0.927204	1.18221	1.19348	0.974421	1.04591	0.960611	1.19287	1.07993	1.02544	0.714964
PE 15:0;0_16:0;0	PE	GPL	MEM	31	0	0	NA	NA	NA	NA	NA	NA	NA	NA	NA	NA	NA	NA
PE 15:0;0_16:1;0	PE	GPL	MEM	31	1	0	1.27156	1.36385	1.39777	0.593015	0.680598	0.52817	1.49877	1.48488	1.72102	0.603826	0.553712	0.396337
PE 15:0;0_17:0;0	PE	GPL	MEM	32	0	0	NA	NA	NA	NA	NA	NA	NA	NA	NA	NA	NA	NA
PE 15:0;0_18:0;0	PE	GPL	MEM	33	0	0	NA	NA	NA	NA	NA	NA	NA	NA	NA	NA	NA	NA
PE 15:0;0_18:1;0	PE	GPL	MEM	33	1	0	1.20951	1.31408	1.26616	1.08812	1.17145	0.85459	1.39245	1.21187	1.69581	1.05997	0.861133	0.552862
PE 15:1;0_16:0;0	PE	GPL	MEM	31	1	0	2.2322	2.92871	2.67136	4.03224	5.35694	NA	2.69402	2.69997	3.1412	NA	NA	NA
PE 15:1;0_16:1;0	PE	GPL	MEM	31	2	0	0.351549	0.356049	0.406052	NA	NA	NA	0.525654	0.611843	0.659608	NA	NA	NA
PE 15:1;0_18:0;0	PE	GPL	MEM	33	1	0	NA	0.120053	NA	NA	0.218529	NA	0.0993229	0.105798	NA	NA	NA	NA
PE 15:1;0_18:1;0	PE	GPL	MEM	33	2	0	0.632769	0.974331	0.950297	NA	0.872251	0.679174	0.920464	0.863498	1.13865	0.697951	0.552735	0.500653
PE 16:0;0_16:0;0	PE	GPL	MEM	32	0	0	NA	NA	NA	NA	NA	NA	NA	NA	NA	NA	NA	NA
PE 16:0;0_16:1;0	PE	GPL	MEM	32	1	0	97.3816	109.278	107.854	46.5173	50.0327	33.7802	125.985	116.608	143.091	46.1512	35.5008	25.6344
PE 16:0;0_16:2;0	PE	GPL	MEM	32	2	0	NA	NA	NA	NA	NA	NA	0.346423	NA	NA	NA	NA	NA
PE 16:0;0_17:0;0	PE	GPL	MEM	33	0	0	NA	NA	NA	NA	NA	NA	NA	NA	NA	NA	NA	NA
PE 16:0;0_18:0;0	PE	GPL	MEM	34	0	0	NA	NA	NA	NA	NA	NA	NA	NA	NA	NA	NA	NA
PE 16:0;0_18:1;0	PE	GPL	MEM	34	1	0	119.694	133.887	136.627	97.3942	107.69	76.1426	153.998	139.278	170.77	94.8234	73.4523	53.0389
PE 16:0;0_18:2;0	PE	GPL	MEM	34	2	0	NA	NA	NA	NA	NA	NA	NA	NA	NA	NA	NA	NA
PE 16:0;0_18:3;0	PE	GPL	MEM	34	3	0	NA	NA	NA	NA	NA	NA	NA	NA	NA	NA	NA	NA
PE 16:0;0_19:1;0	PE	GPL	MEM	35	1	0	NA	NA	NA	NA	NA	NA	NA	NA	NA	NA	NA	NA
PE 16:0;0_20:0;0	PE	GPL	MEM	36	0	0	NA	NA	NA	NA	NA	NA	NA	NA	NA	NA	NA	NA
PE 16:0;0_20:1;0	PE	GPL	MEM	36	1	0	10.837	NA	NA	NA	NA	NA	13.6044	NA	16.0247	NA	NA	NA
PE 16:0;0_22:0;0	PE	GPL	MEM	38	0	0	NA	NA	NA	NA	NA	NA	NA	NA	NA	NA	NA	NA
PE 16:1;0_16:1;0	PE	GPL	MEM	32	2	0	191.257	220.301	210.727	76.1527	79.1575	53.6112	239.133	227.044	282.313	79.0496	62.9782	45.4818
PE 16:1;0_16:2;0	PE	GPL	MEM	32	3	0	NA	NA	NA	NA	NA	NA	NA	NA	NA	NA	NA	NA
PE 16:1;0_17:0;0	PE	GPL	MEM	33	1	0	3.0111	2.97325	3.08915	1.41136	1.51723	1.36889	3.41883	3.33565	3.93927	1.21458	1.31738	1.18123
PE 16:1;0_17:1;0	PE	GPL	MEM	33	2	0	6.19296	6.88479	7.23514	1.62945	1.07139	0.80064	7.75885	7.80363	8.88782	0.94141	0.723635	0.599286
PE 16:1;0_18:0;0	PE	GPL	MEM	34	1	0	NA	NA	NA	NA	NA	NA	NA	NA	NA	NA	NA	NA
PE 16:1;0_18:1;0	PE	GPL	MEM	34	2	0	295.378	340.969	332.789	209.232	219.907	152.776	362.584	334.216	419.862	224.611	179.378	129.973
PE 16:1;0_18:2;0	PE	GPL	MEM	34	3	0	NA	0.386355	NA	0.283508	0.30431	0.197333	0.408323	0.306905	0.445122	0.28549	0.187345	0.133192
PE 16:1;0_18:3;0	PE	GPL	MEM	34	4	0	NA	NA	NA	NA	NA	NA	NA	NA	NA	NA	NA	NA
PE 16:1;0_19:1;0	PE	GPL	MEM	35	2	0	NA	NA	NA	NA	NA	NA	NA	NA	NA	NA	NA	NA
PE 16:1;0_20:0;0	PE	GPL	MEM	36	1	0	NA	NA	NA	NA	NA	NA	NA	NA	NA	NA	NA	NA
PE 16:1;0_20:1;0	PE	GPL	MEM	36	2	0	NA	NA	13.5317	4.24377	5.15338	NA	13.4635	12.7604	15.7331	NA	NA	NA
PE 16:1;0_22:0;0	PE	GPL	MEM	38	1	0	NA	NA	NA	NA	NA	NA	NA	NA	NA	NA	NA	NA
PE 16:2;0_18:0;0	PE	GPL	MEM	34	2	0	NA	NA	NA	NA	NA	NA	NA	NA	NA	NA	NA	NA
PE 16:2;0_18:1;0	PE	GPL	MEM	34	3	0	NA	NA	NA	NA	NA	NA	NA	NA	0.112846	NA	NA	NA
PE 17:0;0_17:0;0	PE	GPL	MEM	34	0	0	NA	NA	NA	NA	NA	NA	NA	NA	NA	NA	NA	NA
PE 17:0;0_18:0;0	PE	GPL	MEM	35	0	0	NA	NA	NA	NA	NA	NA	NA	NA	NA	NA	NA	NA
PE 17:0;0_18:1;0	PE	GPL	MEM	35	1	0	NA	NA	NA	0.614248	0.686082	0.560247	NA	NA	NA	0.546868	0.455789	0.351763
PE 17:1;0_17:1;0	PE	GPL	MEM	34	2	0	NA	NA	NA	NA	NA	NA	NA	NA	NA	NA	NA	NA
PE 17:1;0_18:0;0	PE	GPL	MEM	35	1	0	NA	NA	NA	0.0331134	0.0361604	0.0223166	NA	NA	NA	NA	0.0225681	NA
PE 17:1;0_18:1;0	PE	GPL	MEM	35	2	0	7.39687	8.31791	8.81739	1.7365	1.99039	1.52251	8.8387	8.62194	10.8693	1.66517	1.37356	1.14319
PE 17:1;0_18:2;0	PE	GPL	MEM	35	3	0	NA	NA	NA	NA	NA	NA	NA	NA	NA	NA	NA	NA
PE 17:1;0_20:0;0	PE	GPL	MEM	37	1	0	NA	NA	NA	NA	NA	NA	NA	NA	NA	NA	NA	NA
PE 18:0;0_18:0;0	PE	GPL	MEM	36	0	0	NA	NA	NA	NA	NA	NA	NA	NA	NA	NA	NA	NA
PE 18:0;0_18:1;0	PE	GPL	MEM	36	1	0	NA	NA	NA	10.8409	12.2579	8.64893	NA	12.9556	NA	9.75543	8.10078	5.71468
PE 18:0;0_18:2;0	PE	GPL	MEM	36	2	0	NA	NA	NA	NA	NA	NA	NA	NA	NA	NA	NA	NA
PE 18:0;0_18:3;0	PE	GPL	MEM	36	3	0	NA	NA	NA	NA	NA	NA	NA	NA	NA	NA	NA	NA
PE 18:0;0_19:1;0	PE	GPL	MEM	37	1	0	NA	NA	NA	NA	NA	NA	NA	NA	NA	NA	NA	NA
PE 18:0;0_20:0;0	PE	GPL	MEM	38	0	0	NA	NA	NA	NA	NA	NA	NA	NA	NA	NA	NA	NA
PE 18:0;0_20:1;0	PE	GPL	MEM	38	1	0	NA	NA	NA	NA	NA	NA	NA	NA	NA	NA	NA	NA
PE 18:1;0_18:1;0	PE	GPL	MEM	36	2	0	50.3544	56.561	44.1102	37.0143	39.2924	30.9449	44.9756	42.1661	52.2875	40.4703	33.6409	23.5474
PE 18:1;0_18:2;0	PE	GPL	MEM	36	3	0	NA	NA	NA	NA	NA	NA	NA	NA	NA	NA	NA	NA
PE 18:1;0_18:3;0	PE	GPL	MEM	36	4	0	NA	NA	NA	NA	NA	NA	NA	NA	NA	NA	NA	NA
PE 18:1;0_19:1;0	PE	GPL	MEM	37	2	0	NA	NA	NA	NA	NA	NA	NA	NA	NA	NA	NA	NA
PE 18:1;0_20:0;0	PE	GPL	MEM	38	1	0	NA	NA	NA	NA	NA	NA	NA	NA	NA	NA	NA	NA
PE 18:1;0_20:1;0	PE	GPL	MEM	38	2	0	2.37295	2.49278	2.68858	1.566	1.88559	NA	2.71458	2.50267	2.99085	NA	NA	NA
PE 18:1;0_22:0;0	PE	GPL	MEM	40	1	0	NA	NA	NA	NA	NA	NA	NA	NA	NA	NA	NA	NA
PE 19:1;0_19:1;0	PE	GPL	MEM	38	2	0	NA	NA	NA	NA	NA	NA	NA	NA	NA	NA	NA	NA
PG 10:0;0_16:0;0	PG	GPL	MEM	26	0	0	NA	NA	NA	NA	NA	NA	NA	NA	NA	NA	NA	NA
PG 10:0;0_18:0;0	PG	GPL	MEM	28	0	0	NA	NA	NA	NA	NA	NA	NA	NA	NA	NA	NA	NA
PG 12:0;0_14:0;0	PG	GPL	MEM	26	0	0	NA	0.24221	NA	NA	NA	NA	NA	NA	NA	NA	NA	NA
PG 12:0;0_16:0;0	PG	GPL	MEM	28	0	0	NA	NA	NA	NA	NA	NA	NA	NA	NA	NA	NA	NA
PG 12:0;0_17:1;0	PG	GPL	MEM	29	1	0	NA	NA	NA	NA	NA	NA	NA	NA	NA	NA	NA	NA
PG 12:0;0_18:1;0	PG	GPL	MEM	30	1	0	NA	NA	NA	NA	NA	NA	NA	NA	NA	NA	NA	NA
PG 12:1;0_18:0;0	PG	GPL	MEM	30	1	0	NA	NA	NA	NA	NA	NA	NA	NA	NA	NA	NA	NA
PG 12:1;0_18:1;0	PG	GPL	MEM	30	2	0	NA	NA	NA	NA	NA	NA	NA	NA	NA	NA	NA	NA
PG 14:0;0_14:0;0	PG	GPL	MEM	28	0	0	NA	NA	NA	NA	NA	NA	NA	NA	NA	NA	NA	NA
PG 14:0;0_16:1;0	PG	GPL	MEM	30	1	0	NA	NA	NA	NA	NA	NA	NA	NA	NA	NA	NA	NA
PG 14:0;0_18:0;0	PG	GPL	MEM	32	0	0	NA	NA	NA	NA	NA	NA	NA	NA	NA	NA	NA	NA
PG 14:0;0_18:1;0	PG	GPL	MEM	32	1	0	0.120596	0.142937	0.174476	NA	0.120318	NA	0.185698	0.175508	0.22942	NA	NA	NA
PG 14:1;0_15:0;0	PG	GPL	MEM	29	1	0	NA	NA	NA	NA	NA	NA	NA	NA	NA	NA	NA	NA
PG 14:1;0_15:1;0	PG	GPL	MEM	29	2	0	NA	NA	NA	NA	NA	NA	NA	NA	NA	NA	NA	NA
PG 14:1;0_16:1;0	PG	GPL	MEM	30	2	0	0.888253	0.819236	0.734163	2.44303	2.00405	3.05271	0.567822	0.88289	0.728134	2.09134	2.70285	3.71416
PG 14:1;0_17:1;0	PG	GPL	MEM	31	2	0	2.31352	2.32119	2.33842	1.76459	2.12021	2.71356	1.70204	2.46328	2.5659	1.55452	NA	1.88861
PG 14:1;0_18:0;0	PG	GPL	MEM	32	1	0	NA	NA	NA	NA	NA	NA	NA	NA	NA	NA	NA	NA
PG 14:1;0_18:1;0	PG	GPL	MEM	32	2	0	NA	NA	NA	NA	NA	NA	NA	NA	NA	NA	NA	NA
PG 14:1;0_18:2;0	PG	GPL	MEM	32	3	0	NA	NA	NA	NA	NA	NA	NA	NA	NA	NA	NA	NA
PG 14:1;0_20:0;0	PG	GPL	MEM	34	1	0	NA	NA	NA	NA	NA	NA	NA	NA	NA	NA	NA	NA
PG 15:0;0_16:1;0	PG	GPL	MEM	31	1	0	NA	NA	NA	NA	NA	NA	NA	NA	NA	NA	NA	NA
PG 15:0;0_18:1;0	PG	GPL	MEM	33	1	0	NA	NA	NA	NA	NA	NA	NA	NA	NA	NA	NA	NA
PG 15:1;0_15:1;0	PG	GPL	MEM	30	2	0	NA	NA	NA	NA	NA	NA	NA	NA	NA	NA	NA	NA
PG 15:1;0_16:1;0	PG	GPL	MEM	31	2	0	NA	NA	NA	NA	NA	NA	NA	NA	NA	NA	NA	NA
PG 16:0;0_16:0;0	PG	GPL	MEM	32	0	0	NA	NA	NA	NA	NA	NA	NA	NA	NA	NA	NA	NA
PG 16:0;0_16:1;0	PG	GPL	MEM	32	1	0	0.242947	0.317336	0.322358	0.346541	0.267613	0.318228	0.361313	0.434885	0.468927	0.41372	0.336409	0.274518
PG 16:0;0_17:1;0	PG	GPL	MEM	33	1	0	NA	NA	NA	NA	NA	NA	NA	NA	NA	NA	NA	NA
PG 16:0;0_18:1;0	PG	GPL	MEM	34	1	0	0.568652	0.684501	0.670542	0.949872	1.06557	0.821928	0.858802	0.745084	1.03562	1.61129	1.00291	0.842627
PG 16:1;0_16:1;0	PG	GPL	MEM	32	2	0	NA	NA	NA	0.22486	0.296608	0.331562	NA	NA	NA	0.241456	0.287167	0.240572
PG 16:1;0_17:0;0	PG	GPL	MEM	33	1	0	NA	0.214625	NA	0.104474	0.314948	0.294555	NA	NA	NA	0.251348	0.245934	0.0833066
PG 16:1;0_17:1;0	PG	GPL	MEM	33	2	0	3.44185	3.89828	3.70833	NA	NA	NA	2.66172	NA	4.21603	NA	NA	NA
PG 16:1;0_18:0;0	PG	GPL	MEM	34	1	0	NA	NA	NA	NA	NA	NA	NA	NA	NA	NA	NA	NA
PG 16:1;0_18:1;0	PG	GPL	MEM	34	2	0	0.286843	0.231872	0.292663	0.491954	0.547264	0.568323	NA	0.240971	0.346457	0.525686	0.49671	0.399924
PG 17:0;0_17:1;0	PG	GPL	MEM	34	1	0	NA	NA	NA	NA	NA	NA	NA	NA	NA	NA	NA	NA
PG 17:1;0_18:1;0	PG	GPL	MEM	35	2	0	NA	NA	NA	NA	NA	0.548123	NA	NA	NA	NA	NA	NA
PG 17:1;0_18:2;0	PG	GPL	MEM	35	3	0	NA	NA	NA	NA	NA	NA	NA	NA	NA	NA	NA	NA
PI 10:0;0_12:0;0	PI	GPL	MEM	22	0	0	NA	NA	NA	NA	NA	NA	NA	NA	NA	NA	NA	NA
PI 10:0;0_14:0;0	PI	GPL	MEM	24	0	0	7.88066	8.68762	7.96422	NA	NA	NA	11.1321	8.84332	12.3245	NA	NA	NA
PI 10:0;0_14:1;0	PI	GPL	MEM	24	1	0	NA	NA	NA	NA	NA	NA	NA	NA	NA	NA	NA	NA
PI 10:0;0_15:0;0	PI	GPL	MEM	25	0	0	NA	NA	NA	NA	NA	NA	0.982896	0.629683	NA	NA	NA	NA
PI 10:0;0_16:0;0	PI	GPL	MEM	26	0	0	194.565	214.877	209.645	1.38081	1.5886	1.15613	263.533	226.685	303.09	1.80265	1.38855	1.01489
PI 10:0;0_16:1;0	PI	GPL	MEM	26	1	0	8.88273	9.50561	9.27786	NA	NA	NA	12.4438	10.1468	14.3536	NA	NA	NA
PI 10:0;0_17:0;0	PI	GPL	MEM	27	0	0	NA	0.501257	0.511457	NA	NA	NA	NA	0.213346	NA	NA	NA	NA
PI 10:0;0_17:1;0	PI	GPL	MEM	27	1	0	NA	NA	NA	NA	NA	NA	NA	NA	NA	NA	NA	NA
PI 10:0;0_18:0;0	PI	GPL	MEM	28	0	0	49.7365	56.328	57.9601	1.16216	1.37043	0.906706	67.066	61.6593	78.2366	1.49066	1.08802	0.851288
PI 10:0;0_18:1;0	PI	GPL	MEM	28	1	0	2.04377	2.15558	2.3226	NA	NA	NA	2.78081	2.28239	3.27146	NA	NA	NA
PI 10:0;0_20:0;0	PI	GPL	MEM	30	0	0	NA	NA	NA	NA	NA	NA	0.265563	0.365158	0.341288	NA	NA	NA
PI 10:0;0_22:0;0	PI	GPL	MEM	32	0	0	NA	NA	NA	NA	NA	NA	NA	NA	NA	NA	NA	NA
PI 10:0;0_24:0;0	PI	GPL	MEM	34	0	0	NA	NA	NA	NA	NA	NA	NA	NA	NA	NA	NA	NA
PI 10:0;0_26:0;0	PI	GPL	MEM	36	0	0	NA	NA	NA	NA	NA	NA	NA	NA	NA	NA	NA	NA
PI 10:1;0_14:0;0	PI	GPL	MEM	24	1	0	NA	NA	NA	NA	NA	NA	NA	NA	NA	NA	NA	NA
PI 10:1;0_16:0;0	PI	GPL	MEM	26	1	0	1.6549	1.97968	1.83889	NA	NA	NA	2.55235	2.21375	3.08169	NA	NA	NA
PI 10:1;0_18:0;0	PI	GPL	MEM	28	1	0	NA	NA	NA	NA	NA	NA	NA	0.614393	0.865499	NA	NA	NA
PI 11:0;0_14:0;0	PI	GPL	MEM	25	0	0	NA	NA	NA	NA	NA	NA	NA	NA	NA	NA	NA	NA
PI 11:0;0_16:0;0	PI	GPL	MEM	27	0	0	NA	NA	NA	NA	NA	NA	NA	0.957144	1.43884	NA	NA	NA
PI 11:0;0_16:1;0	PI	GPL	MEM	27	1	0	NA	NA	NA	NA	NA	NA	NA	NA	NA	NA	NA	NA
PI 11:0;0_18:0;0	PI	GPL	MEM	29	0	0	NA	NA	0.169529	NA	NA	NA	NA	NA	NA	NA	NA	NA
PI 11:1;0_16:0;0	PI	GPL	MEM	27	1	0	NA	NA	NA	NA	NA	NA	NA	NA	NA	NA	NA	NA
PI 11:1;0_18:0;0	PI	GPL	MEM	29	1	0	NA	NA	NA	NA	NA	NA	NA	NA	NA	NA	NA	NA
PI 12:0;0_12:0;0	PI	GPL	MEM	24	0	0	NA	NA	0.138349	NA	NA	NA	NA	0.150658	0.255978	NA	NA	NA
PI 12:0;0_12:1;0	PI	GPL	MEM	24	1	0	NA	NA	NA	NA	NA	NA	NA	NA	NA	NA	NA	NA
PI 12:0;0_14:0;0	PI	GPL	MEM	26	0	0	6.95357	7.59997	7.52253	0.103476	NA	NA	9.784	7.75072	10.7347	0.141334	NA	NA
PI 12:0;0_14:1;0	PI	GPL	MEM	26	1	0	0.175892	0.162013	NA	NA	NA	NA	0.198062	0.202049	0.198935	NA	NA	NA
PI 12:0;0_15:0;0	PI	GPL	MEM	27	0	0	1.53424	0.74595	0.80379	NA	NA	NA	1.85425	0.355441	0.501097	NA	NA	NA
PI 12:0;0_15:1;0	PI	GPL	MEM	27	1	0	NA	NA	NA	NA	NA	NA	NA	NA	NA	NA	NA	NA
PI 12:0;0_16:0;0	PI	GPL	MEM	28	0	0	159.742	179.821	179.332	7.18458	8.01537	5.98519	201.486	186.049	238.453	9.41825	7.1026	5.10151
PI 12:0;0_16:1;0	PI	GPL	MEM	28	1	0	11.2701	12.8682	11.7155	0.405892	0.509529	0.371756	15.506	13.1636	17.531	0.565599	0.495496	0.30722
PI 12:0;0_17:0;0	PI	GPL	MEM	29	0	0	0.146013	0.460911	0.065125	NA	NA	NA	NA	0.12447	0.127715	NA	NA	NA
PI 12:0;0_17:1;0	PI	GPL	MEM	29	1	0	NA	NA	NA	NA	NA	NA	NA	NA	NA	NA	NA	NA
PI 12:0;0_18:0;0	PI	GPL	MEM	30	0	0	31.6905	35.9456	37.631	4.02668	4.69378	3.53778	39.3691	38.2245	46.937	4.8177	3.72614	2.82609
PI 12:0;0_18:1;0	PI	GPL	MEM	30	1	0	2.28983	2.63187	2.69759	0.25231	0.336008	0.223191	2.86457	2.6578	3.67238	0.3214	0.313589	NA
PI 12:0;0_20:0;0	PI	GPL	MEM	32	0	0	0.0140765	0.0268252	NA	NA	NA	NA	NA	NA	NA	NA	NA	NA
PI 12:0;0_22:0;0	PI	GPL	MEM	34	0	0	NA	NA	NA	NA	NA	NA	NA	NA	NA	NA	NA	NA
PI 12:0;0_24:0;0	PI	GPL	MEM	36	0	0	NA	NA	NA	NA	NA	NA	NA	NA	NA	NA	NA	NA
PI 12:0;0_26:0;0	PI	GPL	MEM	38	0	0	NA	NA	NA	NA	NA	NA	NA	NA	NA	NA	NA	NA
PI 12:1;0_14:0;0	PI	GPL	MEM	26	1	0	NA	NA	NA	NA	NA	NA	NA	NA	NA	NA	NA	NA
PI 12:1;0_15:0;0	PI	GPL	MEM	27	1	0	NA	NA	NA	NA	NA	NA	NA	NA	NA	NA	NA	NA
PI 12:1;0_16:0;0	PI	GPL	MEM	28	1	0	0.508182	0.689289	0.718742	NA	NA	NA	0.751643	0.65468	0.826235	NA	NA	NA
PI 12:1;0_16:1;0	PI	GPL	MEM	28	2	0	NA	NA	NA	NA	NA	NA	NA	NA	NA	NA	NA	NA
PI 12:1;0_17:0;0	PI	GPL	MEM	29	1	0	NA	NA	NA	NA	NA	NA	NA	NA	NA	NA	NA	NA
PI 12:1;0_18:0;0	PI	GPL	MEM	30	1	0	NA	NA	NA	NA	NA	NA	NA	NA	NA	NA	NA	NA
PI 12:1;0_18:1;0	PI	GPL	MEM	30	2	0	NA	NA	NA	NA	NA	NA	NA	NA	NA	NA	NA	NA
PI 13:0;0_14:0;0	PI	GPL	MEM	27	0	0	NA	NA	NA	NA	NA	NA	NA	NA	NA	NA	NA	NA
PI 13:0;0_16:0;0	PI	GPL	MEM	29	0	0	0.707353	NA	0.339779	NA	NA	NA	NA	0.450439	0.58499	NA	NA	NA
PI 13:0;0_16:1;0	PI	GPL	MEM	29	1	0	NA	NA	NA	NA	NA	NA	NA	NA	NA	NA	NA	NA
PI 13:0;0_18:0;0	PI	GPL	MEM	31	0	0	NA	NA	NA	NA	NA	NA	NA	NA	NA	NA	NA	NA
PI 13:1;0_16:0;0	PI	GPL	MEM	29	1	0	NA	NA	NA	NA	NA	NA	NA	NA	NA	NA	NA	NA
PI 14:0;0_14:0;0	PI	GPL	MEM	28	0	0	3.01086	3.24641	3.84762	0.313603	NA	NA	3.57751	3.63341	4.79699	NA	NA	NA
PI 14:0;0_14:1;0	PI	GPL	MEM	28	1	0	0.932971	1.10047	1.02287	0.0232586	NA	NA	1.31577	1.18276	1.56759	NA	NA	NA
PI 14:0;0_15:0;0	PI	GPL	MEM	29	0	0	NA	0.249479	0.0509737	NA	NA	NA	NA	0.0844116	0.0831927	NA	NA	NA
PI 14:0;0_15:1;0	PI	GPL	MEM	29	1	0	NA	NA	NA	NA	NA	NA	NA	NA	NA	NA	NA	NA
PI 14:0;0_16:0;0	PI	GPL	MEM	30	0	0	30.3028	35.2095	36.6157	1.36555	1.42566	1.21394	36.8771	35.1744	43.5176	1.95521	1.24012	1.07536
PI 14:0;0_16:1;0	PI	GPL	MEM	30	1	0	32.8309	36.8212	36.6881	0.866888	1.03915	0.734539	42.4347	38.2595	47.3119	1.23807	0.964536	0.811535
PI 14:0;0_17:0;0	PI	GPL	MEM	31	0	0	NA	NA	NA	NA	NA	NA	NA	NA	NA	NA	NA	NA
PI 14:0;0_17:1;0	PI	GPL	MEM	31	1	0	0.229169	0.460958	0.271454	NA	NA	NA	0.404989	0.347056	0.373675	0.115414	0.158821	NA
PI 14:0;0_18:0;0	PI	GPL	MEM	32	0	0	NA	0.406486	0.54825	NA	NA	NA	0.486593	0.542509	0.741284	NA	NA	NA
PI 14:0;0_18:1;0	PI	GPL	MEM	32	1	0	27.5891	31.6283	32.514	2.12305	2.27381	1.70085	33.4113	29.2073	40.1356	2.78499	2.07649	1.55659
PI 14:0;0_18:2;0	PI	GPL	MEM	32	2	0	NA	NA	NA	NA	NA	NA	NA	NA	NA	NA	NA	NA
PI 14:0;0_18:3;0	PI	GPL	MEM	32	3	0	NA	NA	NA	NA	NA	NA	NA	NA	NA	NA	NA	NA
PI 14:0;0_20:0;0	PI	GPL	MEM	34	0	0	NA	NA	NA	NA	NA	NA	NA	NA	NA	NA	NA	NA
PI 14:0;0_22:0;0	PI	GPL	MEM	36	0	0	NA	NA	NA	NA	NA	NA	NA	NA	NA	NA	NA	NA
PI 14:0;0_24:0;0	PI	GPL	MEM	38	0	0	NA	NA	NA	NA	NA	NA	NA	NA	NA	NA	NA	NA
PI 14:0;0_26:0;0	PI	GPL	MEM	40	0	0	NA	NA	NA	NA	NA	NA	NA	NA	NA	NA	NA	NA
PI 14:1;0_14:1;0	PI	GPL	MEM	28	2	0	NA	NA	NA	NA	NA	NA	NA	NA	NA	NA	NA	NA
PI 14:1;0_15:0;0	PI	GPL	MEM	29	1	0	NA	NA	NA	NA	NA	NA	NA	NA	NA	NA	NA	NA
PI 14:1;0_16:0;0	PI	GPL	MEM	30	1	0	25.0238	29.0526	29.4018	1.27178	1.53369	1.13053	33.4878	29.5739	37.9227	1.75319	1.24584	1.03967
PI 14:1;0_16:1;0	PI	GPL	MEM	30	2	0	1.69431	2.03766	1.99864	NA	NA	NA	2.26751	2.41496	3.0475	NA	NA	NA
PI 14:1;0_18:0;0	PI	GPL	MEM	32	1	0	7.0037	7.364	7.78531	0.706768	1.01559	0.749888	8.02513	8.13957	10.0259	0.988002	1.05061	0.605883
PI 14:1;0_18:1;0	PI	GPL	MEM	32	2	0	0.702043	0.835381	0.936795	0.257634	NA	0.225058	0.891445	0.740043	1.11586	0.33259	0.286606	NA
PI 14:1;0_19:0;0	PI	GPL	MEM	33	1	0	NA	NA	NA	NA	NA	NA	NA	0.0717484	NA	NA	NA	NA
PI 14:1;0_24:0;0	PI	GPL	MEM	38	1	0	NA	NA	NA	NA	NA	NA	NA	NA	NA	NA	NA	NA
PI 14:1;0_26:0;0	PI	GPL	MEM	40	1	0	NA	NA	NA	NA	NA	NA	NA	0.0387932	NA	NA	NA	NA
PI 15:0;0_15:0;0	PI	GPL	MEM	30	0	0	NA	NA	NA	NA	NA	NA	NA	NA	NA	NA	NA	NA
PI 15:0;0_16:0;0	PI	GPL	MEM	31	0	0	NA	NA	NA	NA	NA	NA	NA	NA	NA	NA	NA	NA
PI 15:0;0_16:1;0	PI	GPL	MEM	31	1	0	3.39321	3.90313	4.31794	1.4831	1.64078	1.27296	4.27465	3.84628	4.89868	1.79667	1.53657	1.05175
PI 15:0;0_18:0;0	PI	GPL	MEM	33	0	0	NA	NA	NA	NA	NA	NA	NA	NA	NA	NA	NA	NA
PI 15:0;0_18:1;0	PI	GPL	MEM	33	1	0	1.2935	1.5723	1.8833	2.58919	2.82174	2.26877	1.54945	1.90694	2.06115	2.77233	2.33696	1.62355
PI 15:0;0_18:2;0	PI	GPL	MEM	33	2	0	NA	NA	NA	NA	NA	NA	NA	NA	NA	NA	NA	NA
PI 15:1;0_16:0;0	PI	GPL	MEM	31	1	0	2.6878	3.21907	3.10333	0.637985	0.836488	0.645264	3.41025	3.17138	3.80216	0.885087	0.784281	0.497957
PI 15:1;0_18:0;0	PI	GPL	MEM	33	1	0	0.478338	0.535661	0.561756	0.27868	0.330725	0.241508	0.582964	0.587854	0.752431	0.273421	0.260864	0.18388
PI 15:1;0_18:1;0	PI	GPL	MEM	33	2	0	NA	NA	NA	NA	NA	NA	NA	NA	NA	NA	NA	NA
PI 16:0;0_16:0;0	PI	GPL	MEM	32	0	0	1.41842	2.05094	2.69953	NA	NA	NA	2.50998	2.82314	3.53708	NA	NA	NA
PI 16:0;0_16:1;0	PI	GPL	MEM	32	1	0	663.624	756.067	791.512	137.678	151.617	119.026	788.548	784.729	960.457	155.336	128.301	90.1025
PI 16:0;0_16:2;0	PI	GPL	MEM	32	2	0	NA	NA	NA	NA	NA	NA	NA	NA	NA	NA	NA	NA
PI 16:0;0_17:0;0	PI	GPL	MEM	33	0	0	NA	NA	NA	NA	NA	NA	NA	NA	NA	NA	NA	NA
PI 16:0;0_17:1;0	PI	GPL	MEM	33	1	0	2.33216	2.79265	2.67211	1.48837	1.75451	1.48126	2.92251	2.57217	3.53998	1.56004	1.61531	0.90307
PI 16:0;0_18:0;0	PI	GPL	MEM	34	0	0	NA	NA	NA	NA	NA	NA	NA	NA	NA	NA	NA	NA
PI 16:0;0_18:1;0	PI	GPL	MEM	34	1	0	578.983	676.393	726.426	346.344	376.803	305.191	662.657	689.495	851.753	371.676	318.034	226.904
PI 16:0;0_18:2;0	PI	GPL	MEM	34	2	0	0.568735	0.665754	0.69006	0.603074	0.469747	NA	0.751913	0.640167	0.862631	0.58443	0.446677	0.335035
PI 16:0;0_18:3;0	PI	GPL	MEM	34	3	0	NA	NA	NA	NA	NA	NA	NA	NA	NA	NA	NA	NA
PI 16:0;0_19:1;0	PI	GPL	MEM	35	1	0	NA	NA	NA	NA	NA	NA	NA	NA	NA	NA	NA	NA
PI 16:0;0_20:0;0	PI	GPL	MEM	36	0	0	NA	NA	NA	NA	NA	NA	NA	NA	NA	NA	NA	NA
PI 16:0;0_20:1;0	PI	GPL	MEM	36	1	0	0.776082	0.935613	0.819107	NA	NA	NA	0.876122	0.896389	1.16075	NA	NA	NA
PI 16:0;0_22:0;0	PI	GPL	MEM	38	0	0	NA	NA	NA	NA	NA	NA	NA	NA	NA	NA	NA	NA
PI 16:0;0_22:1;0	PI	GPL	MEM	38	1	0	NA	NA	NA	NA	NA	NA	NA	0.156105	NA	NA	NA	NA
PI 16:0;0_24:0;0	PI	GPL	MEM	40	0	0	NA	NA	NA	NA	NA	NA	NA	NA	NA	NA	NA	NA
PI 16:0;0_26:0;0	PI	GPL	MEM	42	0	0	NA	NA	NA	NA	NA	NA	NA	NA	NA	NA	NA	NA
PI 16:1;0_16:1;0	PI	GPL	MEM	32	2	0	68.0543	78.6821	80.9324	12.6006	14.6995	10.4592	88.2278	82.524	106.07	15.1932	12.7347	8.35619
PI 16:1;0_17:0;0	PI	GPL	MEM	33	1	0	0.991416	1.11997	1.20426	2.51601	2.39212	2.04367	1.19683	1.25168	1.54835	1.88678	1.92984	1.09661
PI 16:1;0_17:1;0	PI	GPL	MEM	33	2	0	NA	NA	NA	NA	NA	NA	NA	NA	NA	NA	NA	NA
PI 16:1;0_18:0;0	PI	GPL	MEM	34	1	0	203.672	223.792	252.107	81.8812	82.563	66.3308	233.817	251.174	290.637	76.4188	69.8294	44.3129
PI 16:1;0_18:1;0	PI	GPL	MEM	34	2	0	59.7033	71.7806	75.9618	30.3496	33.4922	26.0569	72.4432	74.0978	91.0465	33.3556	28.6284	19.461
PI 16:1;0_18:2;0	PI	GPL	MEM	34	3	0	NA	NA	NA	NA	NA	NA	NA	NA	NA	NA	NA	NA
PI 16:1;0_18:3;0	PI	GPL	MEM	34	4	0	NA	NA	NA	NA	NA	NA	NA	NA	NA	NA	NA	NA
PI 16:1;0_19:0;0	PI	GPL	MEM	35	1	0	NA	NA	NA	NA	NA	NA	NA	NA	NA	NA	NA	NA
PI 16:1;0_20:0;0	PI	GPL	MEM	36	1	0	2.76791	2.57435	2.81628	NA	NA	NA	2.9176	2.52705	3.02974	NA	NA	NA
PI 16:1;0_20:1;0	PI	GPL	MEM	36	2	0	0.67037	0.793415	0.8958	NA	NA	NA	0.949152	0.872364	1.13934	NA	NA	NA
PI 16:1;0_22:0;0	PI	GPL	MEM	38	1	0	0.498197	0.645992	0.642108	NA	NA	NA	0.559391	0.558412	0.666117	NA	NA	NA
PI 16:1;0_24:0;0	PI	GPL	MEM	40	1	0	0.712942	0.816132	0.809779	NA	NA	NA	0.81313	0.914983	1.06336	NA	NA	NA
PI 16:1;0_26:0;0	PI	GPL	MEM	42	1	0	0.916838	1.16444	1.32628	0.525379	0.511242	0.488431	1.29222	1.31742	1.52625	0.43948	0.360703	0.337438
PI 16:2;0_18:0;0	PI	GPL	MEM	34	2	0	0.213749	NA	NA	NA	NA	NA	NA	NA	NA	NA	NA	NA
PI 16:2;0_18:1;0	PI	GPL	MEM	34	3	0	NA	NA	NA	NA	NA	NA	NA	NA	NA	NA	NA	NA
PI 17:0;0_17:0;0	PI	GPL	MEM	34	0	0	NA	NA	NA	NA	NA	NA	NA	NA	NA	NA	NA	NA
PI 17:0;0_18:1;0	PI	GPL	MEM	35	1	0	0.448144	0.544662	0.696919	5.27607	5.33329	4.44242	0.531017	0.667618	0.678586	3.65123	4.12757	2.06477
PI 17:1;0_17:1;0	PI	GPL	MEM	34	2	0	NA	NA	0.0787984	0.0463117	0.0443143	0.049888	0.0949661	NA	NA	0.0717016	0.079441	0.0548575
PI 17:1;0_18:0;0	PI	GPL	MEM	35	1	0	0.709028	0.918104	0.893797	0.814341	0.932023	0.90145	0.831106	0.852611	1.07011	0.833322	0.826815	0.57663
PI 18:0;0_18:0;0	PI	GPL	MEM	36	0	0	NA	NA	NA	NA	NA	NA	NA	NA	NA	NA	NA	NA
PI 18:0;0_18:1;0	PI	GPL	MEM	36	1	0	148.05	173.608	192.577	166.314	171.287	136.831	168.918	185.86	222.57	149.888	137.116	89.2626
PI 18:0;0_18:2;0	PI	GPL	MEM	36	2	0	NA	0.166846	NA	NA	NA	0.205774	NA	0.152037	NA	0.170078	NA	NA
PI 18:0;0_18:3;0	PI	GPL	MEM	36	3	0	NA	NA	NA	NA	NA	NA	NA	NA	NA	NA	NA	NA
PI 18:0;0_20:0;0	PI	GPL	MEM	38	0	0	NA	NA	NA	NA	NA	NA	NA	NA	NA	NA	NA	NA
PI 18:0;0_20:1;0	PI	GPL	MEM	38	1	0	0.111395	NA	0.102327	NA	NA	NA	0.12224	0.0903539	0.104063	NA	NA	NA
PI 18:0;0_22:0;0	PI	GPL	MEM	40	0	0	NA	NA	NA	NA	NA	NA	NA	NA	NA	NA	NA	NA
PI 18:0;0_24:0;0	PI	GPL	MEM	42	0	0	NA	NA	NA	NA	NA	NA	NA	NA	NA	NA	NA	NA
PI 18:1;0_18:1;0	PI	GPL	MEM	36	2	0	5.81587	6.83273	7.22637	6.83906	7.36319	5.60069	6.80564	6.83612	9.0082	6.03038	5.83386	3.78126
PI 18:1;0_18:2;0	PI	GPL	MEM	36	3	0	NA	NA	NA	NA	NA	NA	NA	NA	NA	NA	NA	NA
PI 18:1;0_20:0;0	PI	GPL	MEM	38	1	0	0.578727	0.762568	0.800588	NA	NA	NA	0.676024	0.661306	0.778998	NA	NA	NA
PI 18:1;0_22:0;0	PI	GPL	MEM	40	1	0	0.252242	0.34041	0.337245	NA	NA	NA	0.251452	0.324031	0.281085	NA	NA	NA
PI 18:1;0_24:0;0	PI	GPL	MEM	42	1	0	0.43723	0.46109	0.594509	0.16407	0.163978	NA	0.459975	0.53901	0.580336	0.157138	0.112985	NA
PI 18:1;0_25:0;0	PI	GPL	MEM	43	1	0	NA	NA	NA	NA	0.673997	0.466416	NA	NA	NA	0.494979	0.546311	0.309815
PI 18:1;0_26:0;0	PI	GPL	MEM	44	1	0	0.597766	0.628311	0.806126	1.18659	1.07343	0.792719	NA	0.634151	0.770507	1.00382	0.872649	0.556234
PS 10:0;0_14:0;0	PS	GPL	MEM	24	0	0	NA	NA	NA	NA	NA	NA	NA	NA	NA	NA	NA	NA
PS 10:0;0_16:0;0	PS	GPL	MEM	26	0	0	1.6314	NA	1.60451	NA	NA	NA	1.82045	1.76712	2.31523	NA	NA	NA
PS 10:0;0_16:1;0	PS	GPL	MEM	26	1	0	NA	NA	NA	NA	NA	NA	NA	NA	NA	NA	NA	NA
PS 10:0;0_17:0;0	PS	GPL	MEM	27	0	0	1.77538	1.96378	1.87941	NA	NA	NA	2.09334	1.7336	1.9774	NA	NA	NA
PS 10:0;0_18:0;0	PS	GPL	MEM	28	0	0	NA	NA	NA	NA	NA	NA	NA	NA	NA	NA	NA	NA
PS 10:0;0_18:1;0	PS	GPL	MEM	28	1	0	NA	NA	NA	NA	NA	NA	NA	NA	NA	NA	NA	NA
PS 10:1;0_16:0;0	PS	GPL	MEM	26	1	0	NA	NA	NA	NA	NA	NA	NA	NA	NA	NA	NA	NA
PS 11:1;0_17:0;0	PS	GPL	MEM	28	1	0	NA	NA	NA	NA	NA	NA	NA	NA	NA	NA	NA	NA
PS 12:0;0_12:0;0	PS	GPL	MEM	24	0	0	NA	NA	NA	NA	NA	NA	NA	NA	NA	NA	NA	NA
PS 12:0;0_14:0;0	PS	GPL	MEM	26	0	0	NA	1.93882	0.216252	NA	NA	NA	0.208983	0.196343	0.211242	NA	NA	NA
PS 12:0;0_14:1;0	PS	GPL	MEM	26	1	0	NA	NA	NA	NA	NA	NA	NA	NA	NA	NA	NA	NA
PS 12:0;0_15:0;0	PS	GPL	MEM	27	0	0	NA	NA	NA	NA	NA	NA	NA	NA	NA	NA	NA	NA
PS 12:0;0_16:0;0	PS	GPL	MEM	28	0	0	1.55242	1.86249	1.8663	NA	NA	NA	2.33592	2.02037	2.5879	NA	NA	NA
PS 12:0;0_16:1;0	PS	GPL	MEM	28	1	0	0.865084	1.15851	1.27401	NA	NA	NA	1.13723	1.20328	1.3782	NA	NA	NA
PS 12:0;0_17:0;0	PS	GPL	MEM	29	0	0	0.780833	NA	NA	NA	NA	NA	NA	NA	NA	0.499867	NA	0.371656
PS 12:0;0_17:1;0	PS	GPL	MEM	29	1	0	NA	NA	NA	NA	NA	NA	NA	NA	NA	NA	NA	NA
PS 12:0;0_18:0;0	PS	GPL	MEM	30	0	0	NA	NA	NA	NA	NA	NA	NA	NA	NA	NA	NA	NA
PS 12:0;0_18:1;0	PS	GPL	MEM	30	1	0	0.318065	0.247649	NA	NA	NA	NA	0.249872	0.288755	0.365437	NA	NA	NA
PS 12:1;0_14:0;0	PS	GPL	MEM	26	1	0	NA	NA	NA	NA	NA	NA	NA	NA	NA	NA	NA	NA
PS 12:1;0_16:0;0	PS	GPL	MEM	28	1	0	NA	NA	NA	NA	NA	NA	NA	NA	NA	NA	NA	NA
PS 12:1;0_17:0;0	PS	GPL	MEM	29	1	0	NA	NA	NA	NA	NA	NA	NA	NA	NA	NA	NA	NA
PS 12:1;0_18:0;0	PS	GPL	MEM	30	1	0	NA	NA	NA	NA	NA	NA	NA	NA	NA	NA	NA	NA
PS 14:0;0_14:0;0	PS	GPL	MEM	28	0	0	0.087295	0.100548	0.136575	NA	NA	NA	0.165064	0.145636	0.119728	NA	NA	NA
PS 14:0;0_14:1;0	PS	GPL	MEM	28	1	0	0.30708	NA	NA	NA	NA	NA	0.307792	NA	0.374634	NA	NA	NA
PS 14:0;0_15:0;0	PS	GPL	MEM	29	0	0	NA	NA	NA	NA	NA	NA	NA	NA	NA	NA	NA	NA
PS 14:0;0_16:0;0	PS	GPL	MEM	30	0	0	NA	NA	NA	NA	NA	NA	NA	NA	NA	NA	NA	NA
PS 14:0;0_16:1;0	PS	GPL	MEM	30	1	0	2.15773	1.56056	1.5223	NA	NA	NA	1.98911	1.86173	2.3013	NA	NA	NA
PS 14:0;0_17:0;0	PS	GPL	MEM	31	0	0	NA	NA	NA	NA	NA	NA	NA	NA	NA	NA	NA	NA
PS 14:0;0_17:1;0	PS	GPL	MEM	31	1	0	0.781743	0.725024	0.840793	NA	NA	NA	0.801452	NA	NA	0.177792	NA	NA
PS 14:0;0_18:0;0	PS	GPL	MEM	32	0	0	NA	NA	NA	NA	NA	NA	NA	NA	NA	NA	NA	NA
PS 14:0;0_18:1;0	PS	GPL	MEM	32	1	0	4.91947	5.33703	5.63028	0.912149	0.904976	0.628589	6.24094	6.33545	7.31311	1.02559	0.949775	0.626621
PS 14:0;0_18:2;0	PS	GPL	MEM	32	2	0	NA	NA	NA	NA	NA	NA	NA	NA	NA	NA	NA	NA
PS 14:1;0_15:0;0	PS	GPL	MEM	29	1	0	NA	NA	NA	NA	NA	NA	NA	NA	NA	NA	NA	NA
PS 14:1;0_16:0;0	PS	GPL	MEM	30	1	0	NA	0.707069	0.787026	NA	NA	NA	0.865008	0.991602	1.00106	NA	NA	NA
PS 14:1;0_16:1;0	PS	GPL	MEM	30	2	0	NA	NA	NA	NA	NA	NA	NA	NA	NA	NA	NA	NA
PS 14:1;0_17:1;0	PS	GPL	MEM	31	2	0	NA	NA	NA	NA	NA	NA	NA	NA	NA	NA	NA	NA
PS 14:1;0_18:1;0	PS	GPL	MEM	32	2	0	NA	2.05472	NA	NA	NA	NA	2.36248	2.68366	NA	NA	NA	NA
PS 15:0;0_16:0;0	PS	GPL	MEM	31	0	0	NA	NA	NA	NA	NA	NA	NA	NA	NA	NA	NA	NA
PS 15:0;0_16:1;0	PS	GPL	MEM	31	1	0	2.06027	2.32984	2.6257	0.446012	NA	NA	2.676	2.65785	3.2857	NA	0.395468	0.257816
PS 15:0;0_17:1;0	PS	GPL	MEM	32	1	0	0.212525	NA	NA	NA	NA	NA	0.296035	0.197214	0.294152	NA	NA	NA
PS 15:0;0_18:0;0	PS	GPL	MEM	33	0	0	NA	NA	NA	NA	NA	NA	NA	NA	NA	NA	NA	NA
PS 15:0;0_18:1;0	PS	GPL	MEM	33	1	0	1.28924	1.48917	1.46444	0.676032	0.538992	0.409972	3.84694	1.79545	2.18149	0.577688	0.477563	0.429107
PS 15:1;0_15:1;0	PS	GPL	MEM	30	2	0	NA	NA	NA	NA	NA	NA	NA	NA	NA	NA	NA	NA
PS 15:1;0_16:0;0	PS	GPL	MEM	31	1	0	NA	NA	NA	NA	NA	NA	NA	NA	NA	NA	NA	NA
PS 15:1;0_17:0;0	PS	GPL	MEM	32	1	0	NA	NA	NA	NA	NA	NA	NA	NA	NA	NA	NA	NA
PS 15:1;0_17:1;0	PS	GPL	MEM	32	2	0	NA	NA	NA	NA	NA	NA	NA	NA	NA	NA	NA	NA
PS 15:1;0_18:1;0	PS	GPL	MEM	33	2	0	NA	NA	NA	NA	NA	NA	NA	NA	NA	NA	NA	NA
PS 16:0;0_16:0;0	PS	GPL	MEM	32	0	0	NA	NA	NA	NA	NA	NA	NA	NA	NA	NA	NA	NA
PS 16:0;0_16:1;0	PS	GPL	MEM	32	1	0	31.4362	34.6085	36.1759	9.49705	8.45474	6.46189	41.8055	43.0074	51.3042	10.3693	7.71166	6.86796
PS 16:0;0_17:0;0	PS	GPL	MEM	33	0	0	NA	NA	NA	NA	NA	NA	NA	NA	NA	NA	NA	NA
PS 16:0;0_17:1;0	PS	GPL	MEM	33	1	0	4.34821	4.76415	4.97703	1.0446	1.02069	NA	11.4632	5.50097	6.98795	1.00525	0.93521	NA
PS 16:0;0_18:0;0	PS	GPL	MEM	34	0	0	NA	NA	NA	NA	NA	NA	NA	NA	NA	NA	NA	NA
PS 16:0;0_18:1;0	PS	GPL	MEM	34	1	0	60.342	65.159	66.9949	62.193	52.4292	38.0217	76.9121	83.2179	99.3585	61.6295	45.7266	37.9764
PS 16:0;0_18:2;0	PS	GPL	MEM	34	2	0	NA	NA	NA	NA	NA	NA	NA	NA	NA	NA	NA	NA
PS 16:0;0_20:0;0	PS	GPL	MEM	36	0	0	NA	NA	NA	NA	NA	NA	NA	NA	NA	NA	NA	NA
PS 16:0;0_22:0;0	PS	GPL	MEM	38	0	0	NA	NA	NA	NA	NA	NA	NA	NA	NA	NA	NA	NA
PS 16:1;0_16:1;0	PS	GPL	MEM	32	2	0	14.855	14.3175	14.9103	2.00637	1.86846	1.38713	16.5068	15.7509	24.4856	2.89944	2.22766	1.76447
PS 16:1;0_17:0;0	PS	GPL	MEM	33	1	0	7.11848	7.38231	7.9212	2.22517	2.17417	1.71511	NA	8.51408	10.6928	2.23399	1.95597	1.72581
PS 16:1;0_17:1;0	PS	GPL	MEM	33	2	0	NA	NA	NA	4.88608	4.88681	4.32676	NA	NA	NA	5.40333	5.00176	NA
PS 16:1;0_18:0;0	PS	GPL	MEM	34	1	0	3.84893	4.05852	4.06042	2.50379	2.33141	1.7893	4.58718	NA	5.84879	2.88185	2.3869	1.87833
PS 16:1;0_18:1;0	PS	GPL	MEM	34	2	0	40.5317	46.5514	45.1394	28.8074	25.4833	18.01	50.0278	52.7533	66.0011	39.5886	29.2728	24.6498
PS 16:1;0_20:0;0	PS	GPL	MEM	36	1	0	NA	NA	NA	NA	NA	NA	NA	NA	NA	NA	NA	NA
PS 17:0;0_17:1;0	PS	GPL	MEM	34	1	0	NA	NA	0.203286	0.179645	NA	0.1424	NA	NA	NA	NA	NA	NA
PS 17:0;0_18:0;0	PS	GPL	MEM	35	0	0	NA	NA	NA	NA	NA	NA	NA	NA	NA	NA	NA	NA
PS 17:0;0_18:1;0	PS	GPL	MEM	35	1	0	NA	NA	NA	6.36282	6.39425	5.78623	NA	NA	NA	6.09609	5.4753	4.19507
PS 17:0;0_18:2;0	PS	GPL	MEM	35	2	0	NA	NA	NA	NA	NA	NA	NA	NA	NA	NA	NA	NA
PS 17:1;0_17:1;0	PS	GPL	MEM	34	2	0	0.201365	0.251709	0.129896	0.175571	0.119101	0.149443	0.208015	0.216067	0.272058	0.1573	0.180982	0.115047
PS 17:1;0_18:0;0	PS	GPL	MEM	35	1	0	NA	NA	NA	NA	NA	NA	NA	NA	NA	NA	NA	NA
PS 17:1;0_18:1;0	PS	GPL	MEM	35	2	0	18.3076	NA	NA	11.441	11.3806	NA	19.1314	NA	NA	12.8154	11.3704	NA
PS 17:1;0_19:1;0	PS	GPL	MEM	36	2	0	NA	NA	NA	0.0912885	NA	NA	NA	NA	NA	NA	NA	NA
PS 18:0;0_18:0;0	PS	GPL	MEM	36	0	0	NA	NA	NA	0.594572	0.784963	NA	NA	NA	NA	NA	NA	NA
PS 18:0;0_18:1;0	PS	GPL	MEM	36	1	0	2.31568	2.80485	3.17024	2.93098	2.60498	1.89241	3.0342	3.41491	3.5544	2.50363	1.95435	1.29455
PS 18:0;0_18:2;0	PS	GPL	MEM	36	2	0	NA	NA	NA	NA	NA	NA	NA	NA	NA	NA	NA	NA
PS 18:1;0_18:1;0	PS	GPL	MEM	36	2	0	2.62993	3.06312	2.91838	1.15094	1.10904	0.754919	2.74224	3.08255	3.33821	1.37124	1.0451	0.894541
TAG 34:0;0	TAG	GL	STO	34	0	0	NA	NA	NA	NA	NA	NA	0.606444	0.789839	NA	NA	NA	NA
TAG 36:1;0	TAG	GL	STO	36	1	0	NA	NA	NA	NA	NA	NA	NA	0.704952	NA	NA	NA	NA
TAG 38:0;0	TAG	GL	STO	38	0	0	1.13288	0.976499	0.978903	NA	NA	NA	1.35858	1.68576	1.2631	NA	NA	NA
TAG 38:1;0	TAG	GL	STO	38	1	0	NA	NA	0.958064	NA	NA	NA	1.18445	1.07361	1.35222	NA	NA	NA
TAG 40:0;0	TAG	GL	STO	40	0	0	2.98918	2.93982	3.52233	1.15387	NA	NA	3.47503	3.91205	3.77977	NA	0.855686	NA
TAG 40:1;0	TAG	GL	STO	40	1	0	4.11385	3.99549	4.56119	2.38461	1.44251	0.942266	4.46637	5.34158	5.32877	1.79899	1.50087	NA
TAG 41:0;0	TAG	GL	STO	41	0	0	NA	NA	NA	NA	NA	NA	NA	0.562023	NA	NA	NA	NA
TAG 42:0;0	TAG	GL	STO	42	0	0	10.5141	12.1909	13.7414	2.92626	3.12273	2.61359	13.0921	14.4136	15.8588	4.57774	3.21277	2.74288
TAG 42:1;0	TAG	GL	STO	42	1	0	22.7911	23.6874	26.7268	8.11662	8.31016	6.48636	27.247	29.6636	34.7239	11.3906	8.94283	6.60437
TAG 42:2;0	TAG	GL	STO	42	2	0	7.19854	7.51912	7.83158	2.12807	2.5277	1.75257	8.38977	9.63641	10.7608	2.83419	2.29868	1.75797
TAG 43:0;0	TAG	GL	STO	43	0	0	NA	NA	NA	NA	NA	NA	0.755868	1.07702	NA	NA	NA	NA
TAG 43:1;0	TAG	GL	STO	43	1	0	NA	NA	0.577175	2.06112	NA	NA	0.549908	1.00348	NA	NA	NA	NA
TAG 44:0;0	TAG	GL	STO	44	0	0	11.5103	12.6219	14.4946	6.91377	6.50621	5.23421	13.8946	15.9275	16.9573	8.91954	6.85437	4.97752
TAG 44:1;0	TAG	GL	STO	44	1	0	32.4614	34.2913	38.3029	19.4268	20.5851	16.1269	38.0898	41.3889	48.8206	24.8865	20.0911	14.7162
TAG 44:2;0	TAG	GL	STO	44	2	0	NA	14.3482	15.6289	8.18234	8.6093	6.86025	15.6407	16.8026	19.5728	NA	8.0671	NA
TAG 45:0;0	TAG	GL	STO	45	0	0	NA	NA	NA	NA	NA	NA	0.85034	1.82928	NA	NA	NA	NA
TAG 45:1;0	TAG	GL	STO	45	1	0	NA	NA	NA	0.927878	0.89942	NA	NA	NA	0.787809	0.789216	NA	0.658554
TAG 46:0;0	TAG	GL	STO	46	0	0	5.84946	6.15867	7.78812	NA	4.62516	3.60538	7.32498	8.48985	8.5152	6.00114	4.42141	3.68485
TAG 46:1;0	TAG	GL	STO	46	1	0	27.6495	30.1254	33.113	20.4647	20.6725	16.4684	32.1802	35.2453	39.2861	25.5086	20.4857	14.825
TAG 46:2;0	TAG	GL	STO	46	2	0	25.4261	26.3623	28.5594	19.4366	21.0211	17.0405	29.7671	30.7971	36.0932	24.0366	20.6066	14.6372
TAG 46:3;0	TAG	GL	STO	46	3	0	2.38537	2.73147	2.89842	2.44118	2.43439	2.12072	2.92048	3.08531	3.40523	2.99951	2.48421	1.77144
TAG 47:0;0	TAG	GL	STO	47	0	0	NA	NA	NA	NA	NA	NA	NA	1.935	NA	NA	NA	NA
TAG 47:1;0	TAG	GL	STO	47	1	0	1.23725	1.1126	1.92468	3.69058	3.50994	2.8397	1.78272	3.46008	1.7218	3.98361	3.24492	2.39137
TAG 47:2;0	TAG	GL	STO	47	2	0	1.3968	1.28347	1.54391	5.19503	5.61659	4.76824	1.77648	2.41345	1.86009	5.46888	4.75252	3.51306
TAG 47:3;0	TAG	GL	STO	47	3	0	NA	NA	NA	1.18587	1.40659	1.14523	0.564302	0.696121	NA	1.6367	1.33726	0.90535
TAG 48:0;0	TAG	GL	STO	48	0	0	3.20356	3.51838	4.36514	3.32005	3.3114	NA	4.28148	5.47572	4.57326	3.58233	3.2999	NA
TAG 48:1;0	TAG	GL	STO	48	1	0	41.5165	45.3891	49.4602	80.6447	87.5724	72.1484	47.5767	48.8477	57.54	101.726	83.3672	57.3403
TAG 48:2;0	TAG	GL	STO	48	2	0	99.9145	110.172	118.382	243.257	261.287	219.712	116.465	119.957	145.371	286.669	249.441	169.511
TAG 48:3;0	TAG	GL	STO	48	3	0	74.261	80.5063	85.4008	191.126	209.578	173.023	85.1948	86.9397	109.618	209.573	197.454	129.962
TAG 49:0;0	TAG	GL	STO	49	0	0	NA	NA	NA	NA	NA	NA	NA	1.10247	NA	NA	NA	NA
TAG 49:1;0	TAG	GL	STO	49	1	0	1.20458	1.26543	1.41038	5.9129	6.36027	5.34467	1.43406	2.53094	1.47421	6.16022	5.56908	3.87029
TAG 49:2;0	TAG	GL	STO	49	2	0	1.85719	1.65174	2.33705	10.9342	12.6671	10.5569	2.2527	2.8295	2.28164	12.6996	11.701	7.83076
TAG 49:3;0	TAG	GL	STO	49	3	0	0.760178	0.754864	1.12553	3.78639	4.30303	3.67494	0.908264	1.02263	1.13143	3.79529	4.12022	2.68746
TAG 50:0;0	TAG	GL	STO	50	0	0	NA	1.86219	2.65761	NA	NA	NA	2.53476	3.06684	2.84316	NA	NA	NA
TAG 50:1;0	TAG	GL	STO	50	1	0	35.3436	38.0712	42.1453	119.233	128.694	107.906	38.7606	38.7511	47.0118	146.954	121.637	87.3342
TAG 50:2;0	TAG	GL	STO	50	2	0	106.447	119.323	127.842	431.399	472.25	391.089	122.818	125.696	154.928	497.39	440.52	300.931
TAG 50:3;0	TAG	GL	STO	50	3	0	93.9571	103.377	112.216	396.064	439.408	363.65	107.766	110.661	137.375	421.817	394.293	266.863
TAG 50:4;0	TAG	GL	STO	50	4	0	NA	NA	NA	1.23939	1.09558	0.963473	NA	NA	NA	0.948541	1.03104	NA
TAG 51:1;0	TAG	GL	STO	51	1	0	NA	0.676607	1.11759	3.33718	3.8896	2.80207	0.853361	1.34355	0.936683	3.72062	3.15239	2.33342
TAG 51:2;0	TAG	GL	STO	51	2	0	1.39509	1.30877	1.6065	8.19347	9.22996	7.22285	1.74632	1.7118	1.96911	8.41129	7.92698	5.37415
TAG 51:3;0	TAG	GL	STO	51	3	0	0.920594	0.835837	1.14269	4.10679	5.06005	4.10408	NA	1.12131	1.14158	3.99842	4.43366	2.94216
TAG 52:0;0	TAG	GL	STO	52	0	0	2.26304	2.468	2.79201	NA	NA	NA	2.62268	3.52468	3.63792	NA	NA	NA
TAG 52:1;0	TAG	GL	STO	52	1	0	18.1613	20.5566	NA	NA	NA	59.5462	20.2479	21.1002	24.1986	79.0777	NA	48.5284
TAG 52:2;0	TAG	GL	STO	52	2	0	58.4413	60.5979	65.2203	236.805	261.822	218.972	60.9263	61.3584	77.2513	265.789	232.446	163.361
TAG 52:3;0	TAG	GL	STO	52	3	0	37.219	41.408	45.6364	198.046	222.726	183.274	42.0415	43.1274	52.9906	200.954	189.396	129.534
TAG 52:4;0	TAG	GL	STO	52	4	0	NA	NA	NA	NA	NA	NA	NA	NA	NA	NA	NA	NA
TAG 53:1;0	TAG	GL	STO	53	1	0	NA	NA	0.652994	1.38042	2.15348	1.50032	NA	NA	NA	1.65146	1.79799	1.51945
TAG 53:2;0	TAG	GL	STO	53	2	0	NA	NA	NA	2.80011	5.13758	3.90777	1.23038	NA	1.37281	3.52711	4.28989	3.58029
TAG 53:3;0	TAG	GL	STO	53	3	0	NA	NA	NA	2.09273	4.04609	3.41823	NA	NA	1.08153	2.85795	3.42789	NA
TAG 54:0;0	TAG	GL	STO	54	0	0	1.66247	NA	NA	NA	NA	NA	NA	NA	2.52544	NA	NA	NA
TAG 54:1;0	TAG	GL	STO	54	1	0	6.91066	6.93294	8.28633	16.4495	20.1437	15.6626	7.4285	7.34509	9.41233	20.5203	17.2334	13.638
TAG 54:2;0	TAG	GL	STO	54	2	0	21.1182	19.89	19.948	51.0894	63.0753	52.5604	18.8935	18.7707	23.8963	58.2414	52.5866	39.7658
TAG 54:3;0	TAG	GL	STO	54	3	0	8.34077	6.82018	7.2593	26.618	37.1195	29.6772	6.83486	6.21758	8.18907	28.212	28.0638	22.1233
TAG 54:4;0	TAG	GL	STO	54	4	0	NA	NA	NA	NA	NA	NA	NA	NA	NA	NA	NA	NA
TAG 54:5;0	TAG	GL	STO	54	5	0	NA	NA	NA	NA	NA	NA	NA	NA	NA	NA	NA	NA
TAG 55:1;0	TAG	GL	STO	55	1	0	NA	NA	NA	1.59193	2.42625	1.98291	NA	0.902503	NA	1.93267	1.93095	NA
TAG 55:2;0	TAG	GL	STO	55	2	0	NA	NA	NA	NA	NA	NA	NA	NA	NA	NA	3.88447	NA
TAG 55:3;0	TAG	GL	STO	55	3	0	NA	NA	NA	1.34117	NA	NA	NA	NA	NA	NA	NA	NA
TAG 56:0;0	TAG	GL	STO	56	0	0	0.605057	NA	NA	NA	NA	NA	1.24329	1.21786	NA	NA	NA	NA
TAG 56:1;0	TAG	GL	STO	56	1	0	7.5082	6.2069	6.41712	6.8625	9.47747	8.03795	6.1653	6.52919	8.1175	10.241	10.0531	7.37664
TAG 56:2;0	TAG	GL	STO	56	2	0	9.04073	7.55915	6.93863	10.5555	19.589	15.3492	7.13595	6.59438	8.2652	14.4635	15.7915	14.013
TAG 56:3;0	TAG	GL	STO	56	3	0	4.20821	3.15881	2.37349	5.30543	12.347	9.60031	2.56809	NA	NA	6.54901	9.22416	8.43577
TAG 57:1;0	TAG	GL	STO	57	1	0	NA	NA	NA	7.7113	9.50554	NA	NA	NA	NA	10.8445	8.83885	6.49687
TAG 57:2;0	TAG	GL	STO	57	2	0	NA	NA	NA	11.2088	13.3728	NA	NA	NA	NA	12.6822	NA	8.43913
TAG 58:1;0	TAG	GL	STO	58	1	0	5.86997	6.59289	6.81257	25.5094	28.3357	22.5759	8.3124	8.27046	9.41259	31.8895	28.0419	16.8111
TAG 58:2;0	TAG	GL	STO	58	2	0	7.60661	8.32469	8.6276	31.7444	40.1194	30.4129	9.62638	9.0311	11.7702	40.3387	36.4543	25.9703
TAG 58:3;0	TAG	GL	STO	58	3	0	NA	NA	NA	2.38248	5.45073	4.77481	0.690816	0.843774	0.858263	3.04226	3.91021	3.63249
TAG 59:1;0	TAG	GL	STO	59	1	0	NA	NA	NA	NA	NA	NA	NA	NA	NA	NA	NA	NA
TAG 59:2;0	TAG	GL	STO	59	2	0	NA	NA	NA	NA	NA	22.9739	NA	NA	NA	26.8835	24.8511	NA
TAG 60:1;0	TAG	GL	STO	60	1	0	3.66666	3.668	4.28163	26.8259	28.8882	22.8408	4.62808	4.47439	5.89245	35.7947	29.9048	NA
TAG 60:2;0	TAG	GL	STO	60	2	0	NA	4.7176	4.89685	44.7121	50.3968	40.0046	5.26993	5.15409	6.81876	53.7656	46.5309	30.9513
TAG 60:3;0	TAG	GL	STO	60	3	0	NA	NA	NA	NA	1.71795	NA	NA	NA	NA	NA	NA	NA
							10194.2	11275.1	12227.9	7836.59	8764.52	7025.85	11820.4	11906.4	14493.3	8769.72	7749.27	5165.92

## Sheet: Lipid Classes raw data and mol%
Sample names	WT log1	WT log2	WT log3	WT Stat1	WT Stat2	WT Stat3	OE log1	OE log2	OE log3	OE Stat1	OE Stat2	OE Stat3
sum of all lipids in sample (pmol)	10194.2	11275.1	12227.9	7836.59	8764.52	7025.85	11820.4	11906.4	14493.3	8769.72	7749.27	5165.92
Functional category MEM (Membranelipids)
sum of all MEM (pmol)	8564.47	9554.36	10392.3	4811.19	5326.72	4198.46	10023	10068.1	12320.2	5181.39	4387.86	3026.46
CDP-DAG	3.02693	3.10204	3.31468	1.96235	2.37671	1.67733	4.50441	4.44253	5.80824	3.82282	1.82086	2.19066
CL	27.2916	33.07	37.7888	82.1969	80.678	64.0621	31.2281	35.7792	41.1403	85.0918	70.5429	49.095
Cer	15.325	16.6679	19.3007	13.6348	16.451	13.535	19.9779	17.0209	21.4219	14.4311	12.5125	8.86714
DAG	594.137	659.602	709.316	334.117	333.379	262.21	683.95	719.238	863.988	339.699	292.257	200.599
IPC	556.621	424.205	660.467	166.748	193.715	157.537	470.458	397.044	514.642	197.637	174.12	121.027
M(IP)2C	183.365	219.048	253.36	185.053	190.262	159.947	176.197	223.362	222.509	157.694	118.731	92.9013
MIPC	78.5967	85.8457	89.7017	55.5689	64.0391	49.4182	102.241	98.2779	113.331	68.5107	51.751	36.9264
PA	1186.93	1459.54	1667.77	472.164	575.035	491.872	1486.67	1600.32	1926.87	492.643	461.728	321.049
PC	1320.57	1497.84	1579.52	1319.89	1481.93	1154.03	1444.04	1453.03	1870.21	1516.96	1285.44	845.462
PE	836.738	943.197	925.243	500.853	536.119	367.182	1043.76	970.101	1203.21	508.209	404.093	291.893
PG	7.86266	8.87219	8.24095	6.32532	6.73658	8.64899	6.33739	4.94262	9.59049	6.68936	5.07198	7.44372
PI	2359.87	2697.17	2837.83	821.06	880.605	702.732	2844.74	2816.48	3492.86	852.204	737.452	506.962
PS	204.674	204.436	206.449	138.124	122.486	81.4759	253.815	239.336	297.55	151.236	117.067	83.0472
Erg	1189.45	1301.77	1393.99	713.486	842.906	684.133	1455.1	1488.7	1737.11	786.558	655.274	458.995
mol % of sample (%)
CDP-DAG	0.0296926	0.0275122	0.0271074	0.0250409	0.0271174	0.0238737	0.038107	0.0373121	0.0400753	0.0435911	0.0234971	0.042406
CL	0.267716	0.2933	0.309036	1.04889	0.920506	0.911805	0.264188	0.300504	0.283857	0.97029	0.910317	0.950363
Cer	0.150331	0.147829	0.157841	0.173989	0.187699	0.192646	0.169012	0.142956	0.147805	0.164555	0.161467	0.171647
DAG	5.82818	5.85007	5.80079	4.26354	3.80374	3.73208	5.78616	6.04075	5.96128	3.87354	3.77142	3.88313
IPC	5.46017	3.76231	5.4013	2.12781	2.21022	2.24224	3.98004	3.33471	3.55089	2.25363	2.24693	2.34279
M(IP)2C	1.79871	1.94276	2.07198	2.3614	2.17082	2.27655	1.49061	1.87598	1.53525	1.79816	1.53215	1.79835
MIPC	0.770993	0.761373	0.73358	0.709095	0.730662	0.703377	0.864948	0.825419	0.781955	0.781219	0.667818	0.714808
PA	11.6432	12.9448	13.639	6.02512	6.56093	7.00089	12.5771	13.4408	13.2949	5.61755	5.95835	6.21476
PC	12.9541	13.2845	12.9173	16.8427	16.9083	16.4255	12.2165	12.2038	12.9039	17.2977	16.5879	16.3661
PE	8.20797	8.3653	7.56664	6.39121	6.11692	5.22616	8.83016	8.14771	8.30184	5.79504	5.21459	5.65036
PG	0.0771287	0.0786882	0.0673945	0.0807152	0.0768619	0.123102	0.0536139	0.0415122	0.0661718	0.0762779	0.0654511	0.144093
PI	23.1491	23.9214	23.2078	10.4773	10.0474	10.0021	24.0663	23.6552	24.0998	9.71756	9.51641	9.81359
PS	2.00774	1.81316	1.68834	1.76256	1.39752	1.15966	2.14726	2.01014	2.05302	1.72452	1.51069	1.6076
Erg	11.6679	11.5455	11.4	9.10455	9.61725	9.73737	12.31	12.5033	11.9856	8.96902	8.45595	8.88506
Functional category LYS (Lysolipids)
sum (pmol total of LYS Lipid categorie)	701.655	689.452	742.457	305.604	345.747	268.385	692.896	680.49	792.74	309.791	244.428	188.877
LPA	25.3848	27.633	31.6165	17.5882	19.4531	16.2911	24.6135	26.6417	32.7515	15.6273	12.9334	9.74299
LPC	342.201	329.731	377.374	198.498	230.829	182.685	318.82	322.713	348.248	200.178	159.684	127.179
LPE	159.909	154.522	151.675	28.9	27.2653	19.4692	161.383	148.799	185.736	29.3618	20.9951	14.628
LPI	171.122	173.966	179.833	58.0479	66.3659	48.9436	182.801	178.798	220.489	63.1197	50.0162	36.5193
LPS	3.03876	3.59952	1.95863	2.56958	1.83339	0.995778	5.27811	3.53803	5.51518	1.50439	0.799061	0.807855
mol % of sample (%)
LPA	0.249012	0.245079	0.25856	0.224437	0.221952	0.231874	0.208229	0.223759	0.225977	0.178196	0.166899	0.188601
LPC	3.35681	2.92441	3.08617	2.53297	2.63367	2.60019	2.69719	2.71041	2.40282	2.2826	2.06064	2.46188
LPE	1.56863	1.37047	1.2404	0.368782	0.311087	0.277109	1.36529	1.24973	1.28153	0.334809	0.27093	0.283163
LPI	1.67862	1.54292	1.47068	0.740729	0.757211	0.696622	1.54648	1.5017	1.52131	0.719746	0.645431	0.706927
LPS	0.0298087	0.0319245	0.0160177	0.0327895	0.0209183	0.0141731	0.0446524	0.0297153	0.0380532	0.0171544	0.0103114	0.0156382
Functional category STO (Storagelipids)
sum (pmol total of STO Lipid categorie)	928.088	1031.3	1093.18	2719.8	3092.06	2559	1104.52	1157.85	1380.34	3278.55	3116.97	1950.58
EE	118.029	143.344	148.676	399.58	498.215	361.729	160.143	170.393	206.368	537.01	731.215	296.241
TAG	810.059	887.959	944.503	2320.22	2593.85	2197.27	944.375	987.453	1173.97	2741.54	2385.76	1654.34
mol % of sample (%)
EE	1.15781	1.27133	1.21587	5.0989	5.68445	5.14855	1.3548	1.4311	1.42389	6.12345	9.43592	5.73453
TAG	7.94626	7.87538	7.72415	29.6075	29.5948	31.2741	7.98934	8.29345	8.1001	31.2614	30.7869	32.0242

## Sheet: Structural Categorys pmol only
Sample names	WT log1	WT log2	WT log3	WT Stat1	WT Stat2	WT Stat3	OE log1	OE log2	OE log3	OE Stat1	OE Stat2	OE Stat3
sum of all lipids in sample (pmol)	10194.2	11275.1	12227.9	7836.59	8764.52	7025.85	11820.4	11906.4	14493.3	8769.72	7749.27	5165.92
LYS (Lysolipids)
GPL (Glycerophospholipids)
GPL total (pmol)	701.655	689.452	742.457	305.604	345.747	268.385	692.896	680.49	792.74	309.791	244.428	188.877
LPA (lyso-phosphatidate)	25.3848	27.633	31.6165	17.5882	19.4531	16.2911	24.6135	26.6417	32.7515	15.6273	12.9334	9.74299
LPC (lyso-phosphatidyl- choline)	342.201	329.731	377.374	198.498	230.829	182.685	318.82	322.713	348.248	200.178	159.684	127.179
LPE (lyso-phosphatidylethanolamine)	159.909	154.522	151.675	28.9	27.2653	19.4692	161.383	148.799	185.736	29.3618	20.9951	14.628
LPI (lyso- phosphatidylinositol)	171.122	173.966	179.833	58.0479	66.3659	48.9436	182.801	178.798	220.489	63.1197	50.0162	36.5193
LPS (lyso-phosphatidylserine)	3.03876	3.59952	1.95863	2.56958	1.83339	0.995778	5.27811	3.53803	5.51518	1.50439	0.799061	0.807855
MEM (Membrane Lipids)
GL (Glycerolipide)
GL total (pmol)	594.137	659.602	709.316	334.117	333.379	262.21	683.95	719.238	863.988	339.699	292.257	200.599
DAG (Diacylglycerol)	594.137	659.602	709.316	334.117	333.379	262.21	683.95	719.238	863.988	339.699	292.257	200.599
GPL (Glycerophospholipids)
GPL total (pmol)	5946.97	6847.22	7266.16	3342.58	3685.96	2871.68	7115.1	7124.44	8847.23	3616.86	3083.22	2107.14
CDP-DAG (cytidinediphosphate-diacylglycerol)	3.02693	3.10204	3.31468	1.96235	2.37671	1.67733	4.50441	4.44253	5.80824	3.82282	1.82086	2.19066
CL (Cardiolipin)	27.2916	33.07	37.7888	82.1969	80.678	64.0621	31.2281	35.7792	41.1403	85.0918	70.5429	49.095
PA (Phosphatidic acid)	1186.93	1459.54	1667.77	472.164	575.035	491.872	1486.67	1600.32	1926.87	492.643	461.728	321.049
PC (Phosphatidylcholines)	1320.57	1497.84	1579.52	1319.89	1481.93	1154.03	1444.04	1453.03	1870.21	1516.96	1285.44	845.462
PE (Phosphatidylethanolamine)	836.738	943.197	925.243	500.853	536.119	367.182	1043.76	970.101	1203.21	508.209	404.093	291.893
PG (Phosphatidylglycerol)	7.86266	8.87219	8.24095	6.32532	6.73658	8.64899	6.33739	4.94262	9.59049	6.68936	5.07198	7.44372
PI (Phosphatidylinositol)	2359.87	2697.17	2837.83	821.06	880.605	702.732	2844.74	2816.48	3492.86	852.204	737.452	506.962
PS (Phosphatidylserin)	204.674	204.436	206.449	138.124	122.486	81.4759	253.815	239.336	297.55	151.236	117.067	83.0472
SL (Sphingolipids)
SL total (pmol)	833.908	745.767	1022.83	421.005	464.467	380.437	768.874	735.705	871.904	438.272	357.114	259.721
Cer (ceramid)	15.325	16.6679	19.3007	13.6348	16.451	13.535	19.9779	17.0209	21.4219	14.4311	12.5125	8.86714
IPC (Inositolphosphoryl-ceramide)	556.621	424.205	660.467	166.748	193.715	157.537	470.458	397.044	514.642	197.637	174.12	121.027
M(IP)2C (mannosyl-di- (inositolphosphoryl)ceramide)	183.365	219.048	253.36	185.053	190.262	159.947	176.197	223.362	222.509	157.694	118.731	92.9013
MIPC (mannosyl-inositolphosphorylceramide)	78.5967	85.8457	89.7017	55.5689	64.0391	49.4182	102.241	98.2779	113.331	68.5107	51.751	36.9264
ST (Sterols)
ST total (pmol)	1189.45	1301.77	1393.99	713.486	842.906	684.133	1455.1	1488.7	1737.11	786.558	655.274	458.995
Ergosterol	1189.45	1301.77	1393.99	713.486	842.906	684.133	1455.1	1488.7	1737.11	786.558	655.274	458.995
STO (Storage)
STE (Steryl ester)
STE total (pmol)	118.029	143.344	148.676	399.58	498.215	361.729	160.143	170.393	206.368	537.01	731.215	296.241
EE (Ergosteryl ester)	118.029	143.344	148.676	399.58	498.215	361.729	160.143	170.393	206.368	537.01	731.215	296.241
GL (Glycerolipide)
GL total (pmol)	810.059	887.959	944.503	2320.22	2593.85	2197.27	944.375	987.453	1173.97	2741.54	2385.76	1654.34
TAG (triacylglycerol)	810.059	887.959	944.503	2320.22	2593.85	2197.27	944.375	987.453	1173.97	2741.54	2385.76	1654.34

## Sheet: Statistical analysis
Multiple unpaired t-tests; False Discovery Rate using the two-stage step-up method of Benjamini, Krieger and Yekutieli (Q=5%)
Log phase	Discovery?	P value	Mean of WT (log phase)	Mean of Lec1 OE (log phase)	Difference	SE of difference	t ratio	df	q value
CDP-DAG	Yes	0.000826	0.0281	0.0385	-0.01039	0.001149	9.049	4	0.017353
CL	No	0.676855	0.29	0.2828	0.007168	0.01597	0.4487	4	0.710697
Cer	No	0.890169	0.152	0.1533	-0.001257	0.008547	0.1471	4	0.890169
DAG	No	0.249406	5.826	5.929	-0.1031	0.07654	1.346	4	0.349168
IPC	No	0.100087	4.875	3.622	1.253	0.5878	2.131	4	0.182441
M(IP)2C	No	0.104252	1.938	1.634	0.3039	0.1451	2.095	4	0.182441
MIPC	No	0.06007	0.7553	0.8241	-0.06879	0.02646	2.6	4	0.170182
PA	No	0.60357	12.74	13.1	-0.3619	0.643	0.5629	4	0.667103
PC	No	0.077935	13.05	12.44	0.6106	0.2591	2.357	4	0.173113
PE	No	0.300724	8.047	8.427	-0.3799	0.3199	1.188	4	0.3947
PG	No	0.060261	0.0744	0.05377	0.02064	0.007948	2.597	4	0.170182
PI	No	0.147009	23.43	23.94	-0.5143	0.2864	1.795	4	0.232194
PS	No	0.082435	1.836	2.07	-0.2337	0.1014	2.306	4	0.173113
Erg	No	0.012725	11.54	12.27	-0.7285	0.1697	4.292	4	0.066808
LPA	No	0.010073	0.2509	0.2193	0.03156	0.00687	4.594	4	0.066808
LPC	No	0.032305	3.122	2.603	0.519	0.1612	3.219	4	0.135682
LPE	No	0.405228	1.393	1.299	0.09431	0.1015	0.9295	4	0.500576
LPI	No	0.547357	1.564	1.523	0.04091	0.06232	0.6565	4	0.638583
LPS	No	0.154796	0.02592	0.03747	-0.01156	0.006599	1.751	4	0.232194
EE	No	0.009934	1.215	1.403	-0.1883	0.04081	4.613	4	0.066808
TAG	No	0.064831	7.849	8.128	-0.279	0.1104	2.528	4	0.170182
Stationary phase	Discovery?	P value	Mean of WT (log phase)	Mean of Lec1 OE (log phase)	Difference	SE of difference	t ratio	df	q value
CDP-DAG	No	0.165205	0.02534	0.0365	-0.01115	0.006578	1.696	4	0.346931
CL	No	0.743273	0.9604	0.9437	0.01674	0.04769	0.351	4	0.867152
Cer	No	0.040808	0.1848	0.1659	0.01889	0.006342	2.978	4	0.193969
DAG	No	0.623531	3.933	3.843	0.09043	0.1703	0.531	4	0.770244
IPC	No	0.129333	2.193	2.281	-0.08769	0.046	1.906	4	0.33914
M(IP)2C	No	0.005836	2.27	1.71	0.56	0.1044	5.363	4	0.061283
MIPC	No	0.848694	0.7144	0.7213	-0.006904	0.03393	0.2035	4	0.938031
PA	No	0.144663	6.529	5.93	0.5988	0.3309	1.809	4	0.33914
PC	No	0.941028	16.73	16.75	-0.02512	0.319	0.07873	4	0.95527
PE	No	0.413255	5.911	5.553	0.3581	0.3926	0.9122	4	0.578557
PG	No	0.95527	0.09356	0.09527	-0.001714	0.02872	0.05968	4	0.95527
PI	No	0.047877	10.18	9.683	0.4931	0.1749	2.819	4	0.193969
PS	No	0.401403	1.44	1.614	-0.1744	0.1859	0.9379	4	0.578557
Erg	No	0.046096	9.486	8.77	0.7164	0.2508	2.856	4	0.193969
LPA	Yes	0.002259	0.2261	0.1779	0.04819	0.006939	6.944	4	0.047434
LPC	No	0.05542	2.589	2.268	0.3206	0.1198	2.677	4	0.193969
LPE	No	0.531286	0.319	0.2963	0.02269	0.03315	0.6845	4	0.697313
LPI	No	0.234795	0.7315	0.6907	0.04082	0.02921	1.397	4	0.379284
LPS	No	0.229123	0.02263	0.01437	0.008259	0.005824	1.418	4	0.379284
EE	No	0.207278	5.311	7.098	-1.787	1.189	1.503	4	0.379284
TAG	No	0.145346	30.16	31.36	-1.199	0.664	1.805	4	0.33914
