# Supplementary material for: Systematic analysis of membrane contact sites in Saccharomyces cerevisiae uncovers modulators of cellular lipid distribution
Source: eLife. 2022 Nov 10;11:e74602. doi: 10.7554/eLife.74602 (PMC9648973; doi:10.7554/eLife.74602)
Supplement: Supplementary file 5. [file elife-74602-supp5.xlsx]

## Sheet: Strains
Table S5 - Yeast strains used in this study
Number	Name	Genotype	Source / Reference	Comments
MS701	BY4741	his3∆1 leu2∆0 met15∆0 ura3∆0	Brachmann et al. 1998
MS2880	Split venus reporter peroxisome-mitochondria contact	his3∆1 leu2∆0 met15∆0 ura3∆0 PEX25-VN::KAN TOM70-VC::HIS	Kind gift of Nadav Shai, Schuldiner lab
MS2882	Split venus reporter lipid droplet-plasma membrane contact	his3∆1 leu2∆0 met15∆0 ura3∆0 OSW5-VN::KAN INA1-VC::HIS	Shai et al. 2018
MS2885	Split venus reporter endoplasmics reticulum-lipid droplet contact	his3∆1 leu2∆0 met15∆0 ura3∆0 PHO88-VN::KAN OSW5-VC::HIS	Shai et al. 2018
MS3343	Split venus reporter peroxisome-vacuole contact	his3∆1 leu2∆0 met15∆0 ura3∆0 PEX25-VN::KAN ZRC1-VC::HIS	This study
MS3345	Split venus reporter vacuole-endoplasmic reticulum contact	his3∆1 leu2∆0 met15∆0 ura3∆0 ZRC1-VC::HIS PHO88-VN::KAN	This study
MS4314	Split venus reporter Golgi-peroxisome contact	his3∆1 leu2∆0 met15∆0 ura3∆0 CET1pr-VN-STE13::KAN PEX25-VC::HYGRO	This study
MS4864	∆ypr097w	his3∆1 leu2∆0 met15∆0 ura3∆0 ∆ypr097w::NAT	This study
MS4865	TDH3pr-YPR097W	his3∆1 leu2∆0 met15∆0 ura3∆0 NAT::TDH3pr-YPR097W	This study
MS4867	ADH1pr-yeGFP-YPR097W	his3∆1 leu2∆0 met15∆0 ura3∆0 NAT::ADH1pr-yeGFP-YPR097W	This study
MS4893	YPR097W-yeGFP	his3∆1 leu2∆0 met15∆0 ura3∆0 YPR097w-yeGFP::HIS	This study
MS4895	ADH1pr-yeGFP-YPR097W FAA4-mCherry	his3∆1 leu2∆0 met15∆0 ura3∆0 NAT::ADH1pr-yeGFP-YPR097W Faa4-mCherry::HIS	This study
MS4898	YPR097Wpr-GFP-YPR097W FAA4-mCherry	his3∆1 leu2∆0 met15∆0 ura3∆0 lys+ can1∆::GAL1pr-SceI::STE2pr-SpHIS5 lyp1∆::STE3pr-LEU2 ; YPR097Wpr-sfGFP-YPR097W; FAA4-mCherry::NAT	This study
MS5129	TEF2pr-mCherry-YPR097W	his3∆1 leu2∆0 met15∆0 ura3∆0 TEF2pr-mCherry-YPR097W::URA	This study
MS5225	YPR097Wpr-GFP-YPR097W	his3∆1 leu2∆0 met15∆0 ura3∆0 lys+ can1∆::GAL1pr-SceI::STE2pr-SpHIS5 lyp1∆::STE3pr-LEU2 YPR097Wpr-sfGFP- YPR097W	Yofe et al. 2016
MS5267	ADH1pr-YPR097W-GFP	his3∆1 leu2∆0 met15∆0 ura3∆0 YPR097W-yeGFP::HIS NAT::ADH1pr-YPR097W	This study
MS5459	mCherry-D4H	his3∆1 leu2∆0 met15∆0 ura3∆0 ∆HO::URA_mCherry-D4H	This study
MS5460	Δypr097w mCherry-D4H	his3∆1 leu2∆0 met15∆0 ura3∆0 ∆ypr097w::NAT ∆HO::URA_mCherry-D4H	This study
MS5461	TDH3pr-YPR097W mCherry-D4H	his3∆1 leu2∆0 met15∆0 ura3∆0 NAT::TDH3-YPR097W ∆HO::URA_mCherry-D4H	This study
MS5537	ADH1pr-GFP-YPR097W Δscs2 Δscs22 SEC63-mCherry	his3∆1 leu2∆0 met15∆0 ura3∆0 NAT::ADH1pr-yeGFP-YPR097W Δscs2::HIS Δscs22::LEU Sec63-mCherry::KAN	This study
SSY041	YPR097w-Envy	his3∆1 leu2∆0 met15∆0 ura3∆0 YPR097w-Envy::spHIS5	This study	Built in BY4741 background
SSY228	YPR097w-Envy ∆fld1	his3∆1 leu2∆0 met15∆0 ura3∆0 YPR097w-Envy::spHIS5 fld1::KAN	This study	Built in BY4741 background
SSY327	YPR097W-DHFR[1,2]	his3∆1 leu2∆0 met15∆0 ura3∆0 YPR097W-DHFR[1,2]::NAT	This study	Contains 20aa linker as described by Chretien et al. (2018)
MS5060	TEF2pr-GFP-STE13 PEX3-mCherry	his3∆1 leu2∆0 met15∆0 ura3∆0 TEF2pr-GFP-STE13::NAT PEX3-mCherry::HIS	This study
MS4918	CET1pr-VN-STE13 PEX25-VC SEC7-mCherry	his3∆1 leu2∆0 met15∆0 ura3∆0 CET1pr-VN-STE13::G418 PEX25-VC::Hygro SEC7-mCherry::NAT	This study
TLY701	YPR097w-sfGFP	his3∆1 leu2∆0 met15∆0 ura3∆0 YPR097w-sfGFP::URA	This study
TLY702	YPR097w(45A)-sfGFP	his3∆1 leu2∆0 met15∆0 ura3∆0 YPR097w-(45A)-sfGFP::URA	This study
TLY703	YPR097w(45S)-sfGFP	his3∆1 leu2∆0 met15∆0 ura3∆0 YPR097w-(45S)-sfGFP::URA	This study
TLY704	YPR097w(19A)-sfGFP	his3∆1 leu2∆0 met15∆0 ura3∆0 YPR097w-(19A)-sfGFP::URA	This study
TLY705	YPR097w(19S)-sfGFP	his3∆1 leu2∆0 met15∆0 ura3∆0 YPR097w-(19S)-sfGFP::URA	This study
TLY706	YPR097w(26A)-sfGFP	his3∆1 leu2∆0 met15∆0 ura3∆0 YPR097w-(26A)-sfGFP::URA	This study
TLY707	BY4742 YPR097w-(19S)-sfGFP	his3∆1 leu2∆0 lys2∆0 ura3∆0 YPR097w-(19S)-sfGFP::URA	This study
TLY708	YPR097w-3stops∆C	his3∆1 leu2∆0 met15∆0 ura3∆0 YPR097w-3stops∆C::URA	This study
TLY709	BY4742 YPR097w-3stops∆C	his3∆1 leu2∆0 lys2∆0 ura3∆0 YPR097w-3stops∆C::URA	This study
TLY710	BY4743 YPR097w-sfGFP/YPR097-3stops∆C	his3∆1/his3∆1 leu2∆0/leu2∆0 lys2∆0/LYS2 MET15/met15∆0 ura3∆0/ura3∆0 YPR097w-sfGFP::URA/YPR097w-3stops∆C::URA	This study	Diploid
TLY711	BY4743 YPR097w-3stops∆C/YPR097w-3stops∆C	his3∆1/his3∆1 leu2∆0/leu2∆0 lys2∆0/LYS2 MET15/met15∆0 ura3∆0/ura3∆0 YPR097w-3stops∆C::URA/YPR097w-3stops∆C::URA	This study	Diploid
TLY712	BY4743 YPR097w-(19S)-sfGFP/YPR097w-(19S)-sfGFP	his3∆1/his3∆1 leu2∆0/leu2∆0 lys2∆0/LYS2 MET15/met15∆0 ura3∆0/ura3∆0 YPR097w-(19S)-sfGFP::URA/YPR097w-(19S)-sfGFP::URA	This study	Diploid
Library genotype
SWAT	TEF2pr-mCherry punctate library	his3∆1 leu2∆0 met15∆0 ura3∆0 lys+ can1∆::GAL1pr-SceI::STE2pr-SpHIS5 lyp1∆::STE3pr-LEU2 NAT::TEF2pr-mCherry-XXX (or NAT::TEF2pr-MTS-mCherry-XXX, or NAT::TEF2pr-SPkar2-mCherry-XXX)	Yofe et al. 2016 (original full library)
DHFR	MAT𝛂 C-terminal DHFR[3]::Hph prey library	his3∆1 leu2∆0 met15∆0 ura3∆0 YFG1-DHFR[3]::Hph	Tarassov et al. 2008 (original full library)
References
Brachmann CB, Davies A, Cost GJ, Caputo E, Li J, Hieter P, Boeke JD. 1998. Designer deletion strains derived from Saccharomyces cerevisiae S288C: A useful set of strains and plasmids for PCR-mediated gene disruption and other applications. Yeast 14:115–132. doi:10.1002/(SICI)1097-0061(19980130)14:2<115::AID-YEA204>3.0.CO;2-2
Chrétien AÈ, Gagnon-Arsenault I, Dubé AK, Barbeau X, Després PC, Lamothe C, Dion-Côté AM, Lagüe P, Landry CR. 2018. Extended linkers improve the detection of protein-protein interactions (PPIs) by dihydrofolate reductase protein-fragment complementation assay (DHFR PCA) in living cells. Molecular & Cellular Proteomics. 17(2):373-83. doi:10.1074/mcp.TIR117.000385
Shai N, Yifrach E, van Roermund CWT, Cohen N, Bibi C, Ijlst L, Cavellini L, Meurisse J, Schuster R, Zada L, Mari MC, Reggiori FM, Hughes AL, Escobar-Henriques M, Cohen MM, Waterham HR, Wanders RJA, Schuldiner M, Zalckvar E. 2018. Systematic mapping of contact sites reveals tethers and a function for the peroxisome-mitochondria contact. Nature Communications 9:1761. doi:10.1038/s41467-018-03957-8
Tarassov K, Messier V, Landry CR, Radinovic S, Serna Molina MM, Shames I, Malitskaya Y, Vogel J, Bussey H, Michnick SW. 2008. An in vivo map of the yeast protein interactome. Science. 320(5882):1465-70. doi: 10.1126/science.1153878
Yofe I, Weill U, Meurer M, Chuartzman S, Zalckvar E, Goldman O, Ben-Dor S, Schütze C, Wiedemann N, Knop M, Khmelinskii A, Schuldiner M. 2016. One library to make them all: streamlining the creation of yeast libraries via a SWAp-Tag strategy. Nature methods 13:371–8. doi:10.1038/nmeth.3795
