# Supplementary material for: Systematic analysis of membrane contact sites in Saccharomyces cerevisiae uncovers modulators of cellular lipid distribution
Source: eLife. 2022 Nov 10;11:e74602. doi: 10.7554/eLife.74602 (PMC9648973; doi:10.7554/eLife.74602)
Supplement: Supplementary file 6. [file elife-74602-supp6.xlsx]

## Sheet: Plasmids
Table S6 - Plasmids Used In this Study
Number	Name	Use	Bacterial resistance	Yeast selection	Reference
pMS17	pCgLEU2	Genomic manipulation (deletion)	AMP	LEU	Kitada et al., 1995
pMS18	pCgHIS3	Genomic manipulation (deletion)	AMP	HIS	Kitada et al., 1995
pMS49	pFA6a-nat-MX6	Genomic manipulation (deletion)	AMP	NAT	Longtine et al., 1998
pMS78	pFA6a-mCherry-HIS3MX6	Genomic manipulation (C-terminal tagging with mCherry)	AMP	HIS	Longtine et al., 1998
pMS107	Tef2-mCherry-URA	Genomic manipulation (replace native promoter with TEF2 and N-terminal tagging with mCherry)	AMP	URA	Kind gift from David Breslow
pMS233	pBS34-mCherry-Kan	Genomic manipulation (C-terminal tagging with mCherry)	AMP	KAN	Kind gift from Naama Barkai
pMS246	pYM-N9 natNT2-ADH1-yeGFP	Genomic manipulation (replace native promoter with ADH1 promoter and N-terminal tagging with GFP)	AMP	NAT	Janke et al., 2004
pMS272	pYM44 yeGFP-His3	Genomic manipulation (C-terminal tagging with GFP)	AMP	HIS	Janke et al., 2004
pMS351	pYM-N15 natNT2-TDH3	Genomic manipulation (replace native promoter with TDH3)	AMP	NAT	Janke et al., 2004
pMS387	pYM-N7 ADH promoter- NAT	Genomic manipulation (replace native promoter with ADH1)	AMP	NAT	Janke et al., 2004
pMS445	pFA6a-VN-kanMX6	Genomic manipulation (C-terminal tagging with split venus N terminal fragment)	AMP	KAN	Sung and Huh, 2007
pMS446	pFA6a-VC-His3MX6	Genomic manipulation (C-terminal tagging with split venus C terminal fragment)	AMP	HIS	Sung and Huh, 2007
pMS457	pFA6a-kanMX6-PCET1-VN	Genomic manipulation (replace native promoter with CET1 and N-terminal tagging with split venus N terminal fragment)	AMP	KAN	Sung and Huh, 2007
pMS686	pFA6a-VC-Hygro	Genomic manipulation (C-terminal tagging with split venus C terminal fragment)	AMP	HYGRO	Kind gift of Maria Bohnert, Schuldiner lab
pMS710	pRs315-PGK-CFP-HDEL-LEU2	Expression plasmid (ER marker)	AMP	LEU	Kind gift from Joel Goodman
pMS889	pRS41H	Empty CEN vector expressing the HYGRO marker	AMP	HYGRO	Taxis and Knop, 2006
pMS1060	pRS41H_YPR-UTR_yeGFP-YPR097w	Expression plasmid with YPR097w and endogenous small promoter; N-terminus GFP tag	AMP	HYGRO	This study
pMS1065	pRS41H_YPR-UTR_yeGFP-YPR097w(S451E)	Expression plasmid with YPR097w and endogenous small promoter; N-terminus GFP tag. Mutation at phosphorylation site in FFAT motif - phosphomimetic S451E	AMP	HYGRO	This study
pMS1066	pRS41H_YPR-UTR_yeGFP-YPR097w(S451D)	Expression plasmid with YPR097w and endogenous small promoter; N-terminus GFP tag. Mutation at phosphorylation site in FFAT motif - phosphomimetic S451D	AMP	HYGRO	This study
pMS1067	pRS41H_YPR-UTR_yeGFP-YPR097w(S451A)	Expression plasmid with YPR097w and endogenous small promoter; N-terminus GFP tag. Mutation at phosphorylation site in FFAT motif - phosphomimetic S451A	AMP	HYGRO	This study
pMS1093	pDA179-mCherry-D4H	Genomic manipulation (expression of ergosterol-binding protein with mCherry fluorophore)	AMP	URA	Kind gift from Sophie Martin
pMD416	pRS413-YPR097W-UTRpr_YPR097w-GFPEnvy	Expression plasmid with YPR097w and endogenous small promoter; C-terminus GFPENVY tag	AMP	HIS	This study
pMD428	pRS413-YPR097W-UTRpr_YPR097w(1-243)-GFPEnvy	Expression plasmid with YPR097(1-243) and endogenous small promoter; C-terminus GFPENVY tag	AMP	HIS	This study
pMD429	pRS413-YPR097W-UTRpr_YPR097w(1-771)-GFPEnvy	Expression plasmid with YPR097w(1-771) and endogenous small promoter; C-terminus GFPENVY tag	AMP	HIS	This study
pMD430	pRS413-YPR097W-UTRpr_YPR097w(1-979)-GFPEnvy	Expression plasmid with YPR097w(1-979) and endogenous small promoter; C-terminus GFPENVY tag	AMP	HIS	This study
pMD437	pRS413-YPR097W-UTRpr_YPR097w(1-1019)-GFPEnvy	Expression plasmid with YPR097w(1-1019) and endogenous small promoter; C-terminus GFPENVY tag	AMP	HIS	This study
pMD438	pRS413-YPR097W-UTRpr_YPR097w(1-1043)-GFPEnvy	Expression plasmid with YPR097w(1-1043) and endogenous small promoter; C-terminus GFPENVY tag	AMP	HIS	This study
pMD435	pRS413-YPR097W-UTRpr_YPR097w(266-1073)-GFPEnvy	Expression plasmid with YPR097w(266-1073) and endogenous small promoter; C-terminus GFPENVY tag	AMP	HIS	This study
pMD445	pRS413-YPR097W-UTRpr_YPR097w(504-1073)-GFPEnvy	Expression plasmid with YPR097w(504-1073) and endogenous small promoter; C-terminus GFPENVY tag	AMP	HIS	This study
pMD446	pRS413-YPR097W-UTRpr_YPR097w(562-1073)-GFPEnvy	Expression plasmid with YPR097w(562-1073) and endogenous small promoter; C-terminus GFPENVY tag	AMP	HIS	This study
pMD439	pRS413-YPR097W-UTRpr_YPR097w(924-1073)-GFPEnvy	Expression plasmid with YPR097w(924-1073) and endogenous small promoter; C-terminus GFPENVY tag	AMP	HIS	This study
pMD436	pRS413-YPR097W-UTRpr_YPR097w(1038-1073)-GFPEnvy	Expression plasmid with YPR097w(1038-1073) and endogenous small promoter; C-terminus GFPENVY tag	AMP	HIS	This study
pMD440	pUTR-YPR097w-LEU2	Expression plasmid with YPR097w and endogenous small promoter	AMP	LEU	This study
pRS416	pRS416	Empty CEN vector expressing the URA3 marker	AMP	URA	Sikorski and Hieter, 1989
pAG25-4xL-DHFR[1,2]::NAT	pAG25-4xL-DHFR[1,2]::NAT	C-terminal DHFR[1,2]::NAT tagging cassette with 20aa linker	AMP	NAT	Chretien et al. 2008
	pRS416-pGPD-mCherry-Lact-C2	Expression plasmid (PS marker)			Fairn et al., 2011
pTL701	pDA179 YPR097W-UTRpr_YPR097w-sfGFP:URA3:YPR097W-UTR3'	Genomic manipulation (insertion of sfGFP at 3' end of YPR097w )	AMP	URA	This study
pTL702	pTL701 with 19A mutations (from residue 42 to 274)	Genomic manipulation (mutation of 19 residues in YPR097w to alanine & insertion of sfGFP at 3' end )	AMP	URA	This study
pTL703	pTL701 with 19S mutations (from residue 42 to 274)	Genomic manipulation (mutation of 19 residues in YPR097w to serine & insertion of sfGFP at 3' end )	AMP	URA	This study
pTL704	pTL701 with 26A mutations (from residue 553 to 1024)	Genomic manipulation (mutation of 26 residues in YPR097w to alanine & insertion of sfGFP at 3' end )	AMP	URA	This study
pTL705	pTL701 with 26S mutations (from residue 553 to 1024)	Genomic manipulation (mutation of 26 residues in YPR097w to serine & insertion of sfGFP at 3' end )	AMP	URA	This study
pTL706	pTL701 with 45A mutations (from residue 42 to 1024)	Genomic manipulation (mutation of 45 residues in YPR097w to alanine & insertion of sfGFP at 3' end )	AMP	URA	This study
pTL707	pTL701 with 45S mutations (from residue 42 to 1024)	Genomic manipulation (mutation of 45 residues in YPR097w to serine & insertion of sfGFP at 3' end )	AMP	URA	This study
pTL708	pDA179 YPR097W-3stops∆C	Genomic manipulation (YPR097w null, with 3 nonsense mutations at 22/128/282, and deletion of 691-1073)	AMP	URA	This study
References
Chrétien AÈ, Gagnon-Arsenault I, Dubé AK, Barbeau X, Després PC, Lamothe C, Dion-Côté AM, Lagüe P, Landry CR. 2018. Extended Linkers Improve the Detection of Protein-protein Interactions (PPIs) by Dihydrofolate Reductase Protein-fragment Complementation Assay (DHFR PCA) in Living Cells. Mol Cell Proteomics. 17(2): 373–383.
Fairn GD, Hermansson M, Somerharju P, Grinstein S. 2011. Phosphatidylserine is polarized and required for proper Cdc42 localization and for development of cell polarity. Nature cell biology. 13(12):1424-30.
Hentges P, Van Driessche B, Tafforeau L, Vandenhaute J, Carr AM. 2005. Three novel antibiotic marker cassettes for gene disruption and marker switching in Schizosaccharomyces pombe. Yeast. 22(13):1013-9.
Janke C, Magiera MM, Rathfelder N, Taxis C, Reber S, Maekawa H, Moreno‐Borchart A, Doenges G, Schwob E, Schiebel E, Knop M. 2004. A versatile toolbox for PCR‐based tagging of yeast genes: new fluorescent proteins, more markers and promoter substitution cassettes. Yeast 21(11):947-62.
Kitada K, Yamaguchi E, Arisawa M. 1995. Cloning of the Candida glabrata TRP1 and HIS3 genes, and construction of their disruptant strains by sequential integrative transformation. Gene. 165(2):203-206.
Longtine MS, Mckenzie III A, Demarini DJ, Shah NG, Wach A, Brachat A, Philippsen P, Pringle JR. 1998. Additional modules for versatile and economical PCR‐based gene deletion and modification in Saccharomyces cerevisiae. Yeast 14(10):953-61.
Sikorski RS, Hieter P. 1989. A system of shuttle vectors and yeast host strains designed for efficient manipulation of DNA in Saccharomyces cerevisiae. Genetics. 122(1):19-27.
Sung MK, Huh WK. 2007. Bimolecular fluorescence complementation analysis system for in vivo detection of protein–protein interaction in Saccharomyces cerevisiae. Yeast. 24(9):767-75.
Taxis C, Knop M. 2006. System of centromeric, episomal, and integrative vectors based on drug resistance markers for Saccharomyces cerevisiae. Biotechniques. 40(1):73-8.
