# Supplementary material for: Systematic analysis of membrane contact sites in Saccharomyces cerevisiae uncovers modulators of cellular lipid distribution
Source: eLife. 2022 Nov 10;11:e74602. doi: 10.7554/eLife.74602 (PMC9648973; doi:10.7554/eLife.74602)
Supplement: Supplementary file 7. [file elife-74602-supp7.xlsx]

## Sheet: Primers
Table S7 - Primers used in this study
Name	Sequence (5'-3')	Strain	Plasmid
ZRC1 C tag Split VC F	TGTAGATGACGCTGTAAACTGCAATACTTCCAATTGCCTGggtcgacggatccccgggtt	MS3343/3345	MS446
ZRC1 C tag Split VC R	ATAAATTCACCGACGGCTTCAGCCCTTTATATCTTTATTAtcgatgaattcgagctcgtt	MS3343/3345	MS446
PEX25 C tag Split VN/VC F	TTGGATAACAACAAAGAGGTCACTTTGCTCTTCAAAAGATggtcgacggatccccgggtt	MS3343/4314	MS445/686
PEX25 C tag Split VN/VC R	ATATGTACATATCTATATGTATACATATTTTTATATATCAtcgatgaattcgagctcgtt	MS3343/4314	MS445/686
PHO88 C tag Split VN F	AGAAGCTGAAAGAGCCGGTAACGCTGGTGTTAAGGCTGAAGGTCGACGGATCCCCGGGTT	MS3345	MS445
PHO88 C tag Split VN R	AAAACTAGGAAAAAAAAATACTTCGCTTTTGATCGAATCATCGATGAATTCGAGCTCGTT	MS3345	MS445
STE13 N tag Split VN F	AGGGTGTTATTCGTGTAAAAAATATAGAAAGCCCCTAATGgaattcgagctcgtttaaac	MS4314	MS457
STE13 N tag Split VN R	AATGACTATTCTTCCTTTTATGCGAATGAGTTGAAGCAGAagtaccaccagaaccctcgatgttgtggcggatc	MS4314	MS457
YPR097W KO pFA6 F	TAATTGTACTAAAGAATCAAAAATAGACAGTCTTCAAATGcggatccccgggttaattaa	MS4864/5460	MS49
YPR097W KO pFA6 R	ACGAATAAAAACGAATAAAGGAGATACTAGAAAGGGCCTAgaattcgagctcgtttaaac	MS4864/5460	MS49
YPR097W N' tag pYM F	TAATTGTACTAAAGAATCAAAAATAGACAGTCTTCAAATGcgtacgctgcaggtcgac	MS4865/4867/4895/5461/5537	MS246/351
YPR097W N' tag pYM R	GTTCTTCCGTTGGATTTAAAGCAGGAGTGTCTTGAGTAATcatcgatgaattctctgtcg	MS4865/4867/4895/5461/5537	MS246/351
YPR097W C' tag pYM F	GGAATTAAAAAATTATTTAGAAGCTCAAATTGCTAAAAAGcgtacgctgcaggtcgac	MS4893/5267	MS272
YPR097W C' tag pYM R	ACGAATAAAAACGAATAAAGGAGATACTAGAAAGGGCCTAatcgatgaattcgagctcg	MS4893/5267	MS272
FAA4 C' tag pFA6 F	TGTCAAGCCAGATGTGGAAAGAGTTTATAAAGAAAACACTcggatccccgggttaattaa	MS4895	MS78
FAA4 C' tag pFA6 R	GAAGGGCAGGGGGGAAAGTAAAAAACTATGTCTTCCTTTAgaattcgagctcgtttaaac	MS4895	MS78
YPR097W N' tag pFA6 Cherry F	TAATTGTACTAAAGAATCAAAAATAGACAGTCTTCAAATGcggatccccgggttaattaa	MS5129	MS107
YPR097W N' tag pFA6 Cherry R	GTTCTTCCGTTGGATTTAAAGCAGGAGTGTCTTGAGTAATcttgtacagctcgtccatgc	MS5129	MS107
YPR097W N' tag pYM F	TAATTGTACTAAAGAATCAAAAATAGACAGTCTTCAAATGcgtacgctgcaggtcgac	MS5267	MS387
YPR097W N' tag pYM R	GTTCTTCCGTTGGATTTAAAGCAGGAGTGTCTTGAGTAATcatcgatgaattctctgtcg	MS5267	MS387
HO KO D4H F	CCTCATAAGCAGCAATCAATTCTATCTATACTTTAAAATGtacgaagttattagcttgcc	MS5459/5460/5461	MS1093
HO KO D4H R	TTTATTACATACAACTTTTTAAACTAATATACACATTTTAattaaccctcactaaaggga	MS5459/5460/5461	MS1093
SCS2 KO pCg F	AGCAGAAGGGTATTCTACAATCTCCGCGAACCTAAGTATGcacaggaaacagctatgacc	MS5537	MS18
SCS2 KO pCg R	ATATATTTAGAATACAGCTATATCCTCAATCTCCCTATTAgttgtaaaacgacggccagt	MS5537	MS18
SCS22 KO pCg F	GACAGATAATATAAGCACTAGTTCAGACGAGTAAACAATGcacaggaaacagctatgacc	MS5537	MS17
SCS22 KO pCg R	CATTCTTCCTCACTTTTAGTGATAAACTTTTGTAAACTCAgttgtaaaacgacggccagt	MS5537	MS17
Sec63 C tag F	CGATACGGATACAGAAGCTGAAGATGATGAATCACCAGAACGGATCCCCGGGTTAATTAA	MS5537	MS233
Sec63 C tag R	AAGAGCTAAAATGAAAAACTATACTAATCACTTATATCTAGAATTCGAGCTCGTTTAAAC	MS5537	MS233
YPR097W WT CHK F	AACGATCAGTTTGCTTTGAG	MS4864/5460
YPR097W WT CHK R	CGGAGTTAAAGAGCAACAAG	MS4864/4865/4867/4895/5129/5267/5460/5461/5537
S4 pYM Reverse Comp F	CGACAGAGAATTCATCGATG	MS4865/4867/4895/5461/5537
YPR097W C' tag CHK F	GATTGGTGCGAGAAAAATC	MS4893/5267
S3 pYM Reverse Comp R	GTCGACCTGCAGCGTACG	MS4893/5267
FAA4 C' tag CHK F	CCTTACGTCCAAAACATCTG	MS4895
F2 pFA6 Ver Comp Rev R	TTAATTAACCCGGGGATCCG	MS4895/5537
mCherry CHK F	ACGGCGAGTTCATCTACAAG	MS5129
ADH1p F	TTTCCTTCCTTCATTCACGC	MS5267
HO UpStream CHK F	ACTACCGCTGGGCGTTATTA	MS5459/5460/5461
URA3 CHK R	AATTCAACGCGTCTGTGAGG	MS5459/5460/5461
SCS2 WT CHK F	ACCAAACCATTGCATTTAAG	MS5537
SCS2 WT CHK R	CTGGTTCAACAGTTTCCTTG	MS5537
SCS22 WT CHK F	GAATAGTGCCAGAAAAGCTG	MS5537
SCS22 WT CHK R	ACGATCAAGAATTTGTCTCG	MS5537
SEC63 C' tag CHK F	TTTCCCTACAAAGAGACGTG	MS5537
1060_ GFP_F	AATTGTACTAAAGAATCAAAAATAGACAGTCTTCAAATGTCTAAAGGTGAAGAATTATTCACTGG		MS1060
1060_GFP_R	CCGTTGGATTTAAAGCAGGAGTGTCTTGAGTAATCATTTTGTACAATTCA TCCATACCATGGG		MS1060
YPR_seq2F	CTTGGCGTGCCTTCAACTAAGAGC		MS1065/1066/1067
1065_S451E_NsiI_R	GAATCGGATGCATCTTTATATTCATCAAAATCCTCTTCTTCACCTTCACCTTCTTCC		MS1065
1066_S451D_NsiI_R	GAATCGGATGCATCTTTATATTCATCAAAATCATCTTCTTCACCTTCACCTTCTTCC		MS1066
1067_S451A_NsiI_R	GAATCGGATGCATCTTTATATTCATCAAAATCTGCTTCTTCACCTTCACCTTCTTCC		MS1067
pRS-YPR097w pr F_x0000_	CTCACTATAGGGCGAATTGGGTACCGGGCCCCCCCTCGAGAAGACAGATAAATGTACGTTAACCATTTGAC_x0000_		pMD416
Envy-YPR097w NotI R_x0000_	CTTTAGACATGTTAATTAAACCAGCACCGTCACC GCGGCCGCC CTTTTTAGCAATTTGAGCTTCTAAATAATTTTTTAATTCCTG_x0000_		pMD416
YPR097w_1-243 F_x0000_	CTACTCCAACTTCGAGTCCCAAAAGCCATGCTATAAAATCAGGCGGCCGCGGTGACGGTGCTGGTTTAATTAACATGTCTAA_x0000_		pMD428
YPR097w 1-243 R_x0000_	TTAGACATGTTAATTAAACCAGCACCGTCACCGCGGCCGCCTGATTTTATAGCATGGCTTTTGGGACTCGAAGTTGGAGTAG_x0000_		pMD428
YPR097w 1-771 F_x0000_	TTCATCATGGAAACTGCAAAAAGAAGACACGGATGCCGGCGGCCGCGGTGACGGTGCTGGTTTAATTAACATGTCTAAAG_x0000_		pMD429
YPR097w 1-771 R_x0000_	CTTTAGACATGTTAATTAAACCAGCACCGTCACCGCGGCCGCCGGCATCCGTGTCTTCTTTTTGCAGTTTCCATGATGAA_x0000_		pMD429
YPR097w 1-799 F_x0000_	TAGATTTGAAGGTTAAACAAGGTACTAAACAAAATAACGGCGGCCGCGGTGACGGTGCTGGTTTAATTAACATGTCTAAAGG_x0000_		pMD430
YPR097w 1-799 R_x0000__x0000_	CCTTTAGACATGTTAATTAAACCAGCACCGTCACCGCGGCCGCCGTTATTTTGTTTAGTACCTTGTTTAACCTTCAAATCTA_x0000_		pMD430
YPR UTR for Trunc F_x0000_	CTCACTATAGGGCGAATTGGGTACCGGGCCCCCCCTCGAGAAGACAGATAAATGTACGTTAACCATTTGAC_x0000_		pMD435/439/436
YPR Met266 trunc R_x0000_	CCAAGGGATAATTTCGAAAATAAAGATGCTGAGGATTCGGGCATTTGAAGACTGTCTATTTTTGATTCTTTAGTAC_x0000_		pMD435
YPR 924 trunc R_x0000_	CATCTCTACAAATTAACTTATTGAAGTCGATCCTTTCACTCATTTGAAGACTGTCTATTTTTGATTCTTTAGTACAATTATC_x0000_		pMD439
YPR 1038 trunc R_x0000_	TCAATTTCACTTTCATCAACAACAAGATTCAATAAATCTTTCATTTGAAGACTGTCTATTTTTGATTCTTTAGTACAATTATC_x0000_		pMD436
YPR 1043 envy trunc F_x0000__x0000_	GAATGAAGTTGAATTAGAAAAGCAATACAAAGATTTATTGAATCTTGGCGGCCGCGGTGACGGTGCTGG_x0000_		pMD438
YPR C-trunc envy R_x0000_	CAATTCCTCGCCTTTAGACATGTTAATTAAACCAGCACCGTCACCGCGGC_x0000__x0000_		pMD437/438
YPR 1019 envy trunc F_x0000_	GGATCTTTTGGACTTGGAGATGGTGATTTGGTGGATTTGGATCTCGATACAGGCGGCCGCGGTGACGGTGCTGG_x0000_		pMD437
YPR097w Primext F_x0000_	CAGTGGTTGAAGATAATTGTACTAAAGAATCAAAAATAGACAGTCTTCAAATG		pMD445/446
YPR097w 504-END R_x0000_	GTCATCTGCTATTTTCGGATTTATGTCCTTAATATCTAAATTCATTTGAAGACTGTCTATTTTTGATTCTTTAG		pMD445
YPR097w 562-END R_x0000_	CGTATTGTCCTTGATTTCTACTAGTAGACTCATCAAGTATTTCATTTGAAGACTGTCTATTTTTGATTCTTTAG		pMD446
YPR097w DHFR F	GAATTAAAAAATTATTTAGAAGCTCAAATTGCTAAAAAGGGCGGTGGCGGATCAGGAGGC	SSY327
YPR097w DHFR R	GAATAAAAACGAATAAAGGAGATACTAGAAAGGGCCTATTCGACACTGGATGGCGGCGTTAG	SSY327
YPR097w C-term Chk F	CACGCTGCTGGCATACTTCA	SSY327
YPR097w UTR Chk R	GAAGTTCGCAATCGGAATT	SSY327
DHFR[1,2] ConR	TCTTCTCAGGAATGGAGAACCA	SSY327
YPR097w_3UTR_F	AATACGACTCACTATAGGGCGAATTGGAGCTCGCCCTTTCTAGTATCTCCTTTATTC		pTL699
YPR097w_3UTR_R	CACTAAAGGGAACAAAAGCTGGGTACCGCAAGATCATTTTTTCGTCATTC		pTL699
YPR097w_5UTR_Chk_F	GGACGAGATGGCCTTGGG	TLY701-8
YPR097w_5UTR_Chk_R	CGCTAAAATGGCCTTTGCC	TLY701-8
